# Supplementary material
Source: Research Square preprint supplement (doi:10.21203/rs.3.rs-9707896/v1)
Supplement: Supplementary file 1 [file 707945be5326c054d4898824.xlsx]

## Sheet: Sheet1
Province	ID	Year	Fiscal decentralization	Land-finance model	Marketization	Transfer payment	Social security	Transportation	Agricultural mechanization	Unemployment rate	Higher education	Basic education	Per capital disposable income (RMB)	Per capital disposable income of rural households (RMB)	Per capital disposable income of urban households (RMB)	total population (10000 persons)	urbanization	Total population living in urban areas (10000 persons)	Total population living in rural areas (10000 persons)	Wage of employed persons in agriculture, forestry, animal husbandry and fishery sector (RMB)	Wage of employed persons in mining sector (RMB)	Wage of employed persons in manufacturing sector (RMB)	Wage of employed persons in production and supply of wlectricity, heat, gas and water sector (RMB)	Wage of employed persons in construction sector (RMB)	Wage of employed persons in wholesale and retail trades sector (RMB)	Wage of employed persons in transport, storage and post sector (RMB)	Wage of employed persons in hotels and catering services sector (RMB)	Wage of employed persons in information transmission, software and information technology sector (RMB)	Wage of employed persons in financial intermediation sector (RMB)	Wage of employed persons in real estate sector (RMB)	Wage of employed persons in leasiong and business services sector (RMB)	Wage of employed persons in scientific research and technical services sector (RMB)	Wage of employed persons in management of water conservancy, environment and public sector (RMB)	Wage of employed persons in services to households, repair and other services sector (RMB)	Wage of employed persons in education sector (RMB)	Wage of employed persons in health and social service sector (RMB)	Wage of employed persons in culture, sports and entertainment sector (RMB)	Wage of employed persons in public Management, social security and social organization sector (RMB)	Employed persons in agriculture, forestry, animal husbandry and fishery sector (person)	Employed persons in mining sector (RMB)	Employed persons in manufacturing sector (person)	Employed persons in production and supply of wlectricity, heat, gas and water sector (person)	Employed persons in construction sector (person)	Employed persons in wholesale and retail trades sector (person)	Employed persons in transport, storage and post sector (person)	Employed persons in hotels and catering services sector (person)	Employed persons in information transmission, software and information technology sector (person)	Employed persons in financial intermediation sector (person)	Employed persons in real estate sector (person)
Beijing	1	2003	9.5789	0.292131	0.544875	962	0.308036	8602.98	1.35462	0.014	0.050824	0.0684534	12342.1	5601.6	13882.6	1456	0.813976	1185.15	270.851	15034	18858	20059	37112	16730	23088	19977	16530	53010	61713	26064	25742	34898	22357	17433	28565	34173	35006	30279	29114	24602	1022112	37764	650722	376117	306787	212208	177571	140187	189309
Beijing	1	2004	8.8951	0.270346	0.666471	1070	0.308104	8708.33	1.3052	0.013	0.051574	0.0679469	15204.9	6170.33	17116.5	1493	0.825367	1232.27	260.728	14679	20392	22338	41854	20606	27264	24628	17965	57412	80785	27675	26438	41255	25609	16735	32625	39678	45130	38038	29773	21608	1050836	62822	412505	422104	360906	253761	180548	154392	228464
Beijing	1	2005	11.3127	0.131465	0.684726	1300	0.338101	8747.62	1.34048	0.021	0.051365	0.0714009	15964.8	7346.3	17653	1538	0.8362	1286.08	251.924	16025	23774	24958	49776	23300	32109	27655	19926	71544	92764	29811	31699	45661	26575	18159	36447	42925	43617	47277	28330	22183	1023655	57654	410807	387754	370551	245917	194035	158010	233468
Beijing	1	2006	11.8835	0.051219	0.716562	1450	0.3821	12204.2	1.31386	0.02	0.051866	0.0793365	18143.8	8275.5	19977.5	1581	0.8433	1333.26	247.743	19147	29887	29619	55727	26538	38446	33687	21698	83394	88408	31180	42522	50853	28427	19428	40856	46495	47028	45682	26650	20969	996621	59329	342963	364807	415019	244109	213604	184587	243384
Beijing	1	2007	12.7295	0.106677	0.722833	1530	0.411329	12353.6	1.18721	0.018	0.050827	0.0833942	20043.6	9439.6	21988.7	1633	0.845	1379.88	253.115	22154	40213	33964	60679	31668	47971	38426	24321	77463	97320	36921	46290	62230	32058	23521	46503	52698	56980	52668	27113	20376	1024950	67024	328074	383644	458886	249356	291958	208440	263378
Beijing	1	2008	11.6661	0.215123	0.738724	1580	0.428063	12107.1	0.998426	0.018	0.046302	0.0905673	22601.4	10661.9	24724.9	1771	0.849	1503.58	267.421	26114	60057	39076	72195	37950	57768	45285	28379	96963	135192	42923	58327	71895	37207	24522	52952	60199	65056	57460	25983	45468	963114	66196	327597	436418	476774	259835	334102	226825	288297
Beijing	1	2009	11.779	0.175903	0.754845	1990	0.445	12354.2	0.973118	0.014	0.047312	0.0973771	24478	11668.6	26738.5	1860	0.85	1581	279	27020	57031	41595	77875	41981	57948	46087	28759	100794	143187	44256	56647	77632	37183	25006	55420	63081	67881	53529	32282	50284	994566	66111	341064	501649	500662	282761	362109	253837	301468
Beijing	1	2010	12.3614	0.306558	0.766181	2500	0.586065	12567.9	1.00199	0.014	0.045364	0.0988736	26853.1	13262.3	29072.9	1961.9	0.8596	1686.45	275.451	29889	68514	48298	85178	46421	64150	51342	31978	105560	164643	50814	63794	88018	41376	27625	65150	70182	76415	55680	32285	45448	1005543	67987	393501	553851	510042	279558	417332	272388	315401
Beijing	1	2011	14.1398	0.123258	0.78144	2530	0.625582	12706.5	0.952016	0.014	0.04409	0.104151	30395.9	14735.7	32903	2018.6	0.862	1740.03	278.567	34110	74247	56742	83059	52455	70711	59540	37830	116755	172621	57579	83007	97658	47630	34498	74161	82308	92617	66038	23632	67212	1077745	90182	425344	635709	574088	292292	490865	328689	351304
Beijing	1	2012	14.8923	0.063469	0.791085	2750	0.668439	12792.9	0.844296	0.013	0.043976	0.106576	33709.8	16475.7	36468.8	2069.3	0.862	1783.74	285.563	39334	78381	64235	91768	61579	78945	65986	42016	130154	184612	64295	92736	106604	52647	38838	83566	97480	105785	70280	25446	68778	1079701	89378	427383	686440	578348	319643	526268	375626	370621
Beijing	1	2013	14.8748	0.176381	0.807083	2510	0.70522	12900.6	0.71688	0.012	0.042084	0.111096	37309.3	18337.5	40321	2114.8	0.863	1825.07	289.728	48352	82623	72915	99743	68501	86715	72006	45280	136599	206110	72828	99511	113206	57563	43754	87820	109940	112707	73563	31346	67584	1034888	87189	439059	688143	592268	309947	582393	391442	405836
Beijing	1	2014	13.9612	0.159403	0.805477	2460	0.733826	13005.4	0.666682	0.013	0.041365	0.118876	44482.6	18867.3	48531.8	2151.6	0.8635	1857.91	293.693	49478	90402	80418	112136	77359	91976	78183	48870	148828	225482	79280	106540	124123	64725	45776	99337	125273	121094	76226	32331	61051	1000347	82010	456031	722818	602262	302501	611106	431574	410147
Beijing	1	2015	14.7633	0.146545	0.819529	2440	0.74264	13026.8	0.634433	0.014	0.041465	0.247444	48500	20568.7	52859.2	2170.5	0.865	1877.48	293.017	50797	88360	88934	129350	82251	94542	81695	51955	159486	248320	85247	109031	132339	72666	48613	111417	139176	130134	91030	38949	52859	921913	82274	453319	770540	600266	297559	680070	471636	421574
Beijing	1	2016	15.6327	0.084685	0.822978	3410	0.811045	13110.7	0.492236	0.0141	0.041878	0.262723	52554.9	22309.5	57275.3	2173	0.865	1879.64	293.355	51941	91017	97600	134474	89464	98863	90682	54814	170531	239085	92832	119151	139990	76948	52025	120573	147903	139087	101999	36867	45330	868847	90941	459436	783688	582306	294119	692226	514163	438857
Beijing	1	2017	15.5353	0.130613	0.830475	4240	0.837334	13229.8	0.455562	0.0143	0.042383	0.268574	57253.9	24240.5	62406.3	2170.7	0.865	1877.66	293.044	55218	101975	106835	148142	99718	107731	97567	56325	183183	253637	97369	123966	150611	87538	55509	143215	169191	150810	124864	34116	41200	823796	90362	466160	767973	576935	311052	774400	544498	442784
Beijing	1	2018	15.6397	0.087214	0.8357	4640	0.879666	13247.6	0.431927	0.014	0.042711	0.294125	62387.5	26490.3	67989.9	2154	0.865	1863.21	290.79	59015	123959	121299	160386	114631	123713	107828	58156	205834	266921	101346	127507	170139	94369	57182	161029	187390	173632	140310	26639	35957	744135	97386	478122	736426	601978	312119	840300	546870	472509
Beijing	1	2019	14.3318	0.068399	0.845054	3850	0.906854	13313.1	0.425528	0.013	0.043184	0.30961	67829.2	28928.4	73848.5	2153.6	0.866	1865.02	288.582	93835	134956	138312	176707	127711	150238	123277	60870	234121	256979	110044	148567	196767	107790	81465	181240	208481	205405	159193	3585	31784	653864	95549	451159	596265	589525	304980	859131	644776	474197
Tianjin	2	2003	5.8604	0.160839	0.495516	942	0.280218	8998.23	2.2803	0.038	0.036597	0.0658745	8813.07	4566	10312.9	1011	0.739019	747.148	263.852	13257	23605	16179	26085	19609	15606	23748	12430	33785	26295	21253	13514	24545	17325	14492	19226	20426	19838	21363	9747	69738	771367	35481	99424	118660	134642	35093	15382	52016	19043
Tianjin	2	2004	5.5095	0.1638	0.515423	1170	0.291113	9304.42	2.3299	0.038	0.039063	0.0660079	10429.2	5019.53	12279.7	1024	0.745106	762.989	261.011	15450	28193	18431	36691	22412	18992	27305	14058	38257	31454	21545	16717	33134	19173	15467	22582	23958	23067	24358	8666	76896	767918	30745	92620	116907	133305	33255	19114	50710	25911
Tianjin	2	2005	7.4245	0.171375	0.646726	1530	0.29559	9589.38	2.35722	0.037	0.040268	0.0654158	10881.7	5579.9	12638.6	1043	0.7511	783.397	259.603	15954	29571	21183	48417	26777	20603	31836	15861	40569	46874	26727	17898	38973	21113	18648	25268	27435	25892	28544	8149	73114	777223	33612	91209	117381	117669	29964	24253	51154	23225
Tianjin	2	2006	8.006	0.150541	0.683328	1670	0.305302	10014.2	2.3127	0.036	0.04186	0.0698212	12328.1	6227.9	14283.1	1075	0.7573	814.098	260.902	17975	34097	24354	53764	30613	22677	34260	15424	40591	49810	24184	15810	41473	22215	14775	28752	28959	28349	30294	7317	74871	784782	34740	89315	110420	115790	34280	23009	51515	22255
Tianjin	2	2007	8.382	0.181013	0.720271	1790	0.309238	10204.4	2.29004	0.036	0.040359	0.0734764	14143	7010.1	16357.4	1115	0.7631	850.856	264.144	23040	41361	29341	63291	34729	26541	39554	17789	49220	60294	30193	20017	49896	26115	15428	34707	35224	37794	40286	7416	77035	776771	34456	105451	127653	120138	35521	23863	55428	25049
Tianjin	2	2008	8.5012	0.11794	0.741004	1960	0.320176	10671.7	2.22799	0.036	0.038265	0.078542	16801.3	7910.8	19422.5	1176	0.7723	908.225	267.775	28373	52659	34095	72031	41101	30968	45725	20385	54490	69862	37002	22948	60819	31899	21305	44226	43841	43146	52603	7128	70155	727081	35513	108474	135336	124723	37118	25317	61730	31113
Tianjin	2	2009	9.1663	0.123995	0.774652	2280	0.326912	12668.1	2.20311	0.036	0.044782	0.0799396	18606.1	8687.6	21402	1228.16	0.7801	958.088	270.072	31834	57508	36495	71632	44374	32671	48453	21067	59022	74068	40945	26377	67825	36742	20992	56700	49175	49221	57443	7394	92698	728962	33358	106732	118557	122863	40855	24751	66839	31173
Tianjin	2	2010	9.9713	0.13954	0.793073	2620	0.393138	13125.7	2.21219	0.036	0.042331	0.0800365	21385.1	10074.9	24292.6	1299.29	0.7955	1033.59	265.705	40221	59897	42482	82607	53686	44710	55912	22742	73276	89166	47385	28880	80485	44067	23529	66285	60149	54182	67714	7138	89574	752956	32754	102114	123866	124988	48321	22414	69531	36104
Tianjin	2	2011	11.7502	0.096479	0.796429	3100	0.401379	13418.6	2.21043	0.036	0.040603	0.0817423	24074	12321.2	26920.9	1354.58	0.805	1090.44	264.143	46948	74009	49023	86265	43161	48772	64805	25290	74804	97006	120379	34266	91848	48688	26054	70240	67192	59627	71673	6033	104064	1126598	42114	305591	147451	114261	67342	20801	77246	41552
Tianjin	2	2012	11.9418	0.031053	0.800512	2970	0.410148	13620.4	2.17903	0.036	0.03892	0.0851933	26748	14025.5	29626.4	1413.15	0.8155	1152.42	260.726	52939	77244	56786	93283	49156	51282	75420	32183	87458	104335	65766	52667	102653	56593	25518	75395	79513	64602	73850	5494	69158	1202451	43718	310989	174726	140762	69102	32678	78217	55270
Tianjin	2	2013	12.2937	0.038015	0.805371	2920	0.418554	13909.7	2.09243	0.036	0.037359	0.0890068	29333.8	15841	32293.6	1472.21	0.8201	1207.36	264.851	55191	82111	63093	101131	54095	56137	82315	33048	102922	118448	67872	63436	102610	62405	30517	80673	86807	67310	76626	5346	76133	1223296	44907	310366	171697	143455	65674	35718	80907	91472
Tianjin	2	2014	12.1705	0.048214	0.839048	2900	0.42952	14256.6	2.05369	0.035	0.03626	0.094124	28936.6	17014.2	31506	1516.81	0.8227	1247.88	268.93	62672	98238	64864	107275	59019	61764	84736	36138	116902	118263	75052	72255	113548	70314	34200	90983	96200	77689	84998	5045	66381	1189999	44601	312716	172696	143421	59567	38477	89117	66674
Tianjin	2	2015	12.1011	0.027066	0.868617	3040	0.443647	14646	2.03656	0.035	0.035554	0.0976196	31389.7	18481.6	34101.3	1546.95	0.8264	1278.4	268.551	68883	105647	71931	116003	64141	66710	89389	39538	134331	112059	76842	75266	123312	77459	39631	97847	105452	87264	95834	5303	64959	1107759	45238	295429	178455	150084	51796	43541	121349	73436
Tianjin	2	2016	12.4741	0.080949	0.882643	3460	0.495198	14835.4	1.76272	0.035	0.035211	0.100022	34201.9	20075.6	37109.6	1562	0.8293	1295.37	266.633	68864	94379	73550	125996	67943	75098	91615	43403	137440	117489	84337	83380	128067	82499	41777	115539	115367	111368	110749	8475	43989	994163	43475	281843	182105	146712	50668	48475	160073	79579
Tianjin	2	2017	10.32	0.071431	0.893946	3790	0.521195	14630.1	1.74825	0.035	0.036609	0.10088	37115.5	21753.7	40277.5	1557	0.8293	1291.22	265.78	74975	101665	79191	133633	70649	76632	96663	46391	151778	113813	89207	75179	137969	95341	44928	127961	128833	116655	128855	6226	65986	782405	40786	281197	153182	145358	49280	53464	191651	81795
Tianjin	2	2018	9.0606	0.141905	0.850914	3850	0.541218	14386.7	1.32382	0.035	0.035897	0.10386	39621.3	23065.2	42976.3	1560	0.8315	1297.14	262.86	74307	124914	87229	147966	75579	80849	97976	40974	128696	128870	86963	76138	153209	93127	44986	138011	138100	131631	124602	5309	60011	689562	40350	266291	192004	132342	55546	64241	170514	103910
Tianjin	2	2019	9.3297	0.172732	0.909334	3520	0.5507	14276.1	1.39465	0.035	0.035855	0.104666	42597.7	24804.1	46118.9	1561.83	0.8348	1303.82	258.014	64859	140055	93132	156392	90037	87672	103289	37875	144510	138234	89958	74780	172063	96918	60854	139432	148016	165288	129927	2620	58440	673285	41725	250550	199640	149341	63306	65728	198017	107976
Hebei	3	2003	1.8929	0.114627	0.410343	473	0.098316	3483.8	1.70807	0.039	0.012262	0.0536637	4293.66	2853.4	7239.1	6769	0.3284	2222.94	4546.06	4858	14057	10139	17582	9098	6824	12777	7900	23494	15237	10832	9225	16699	10021	14647	11100	11681	12012	11954	90863	281011	1267156	167531	331328	331828	270880	47659	38318	177850	24426
Hebei	3	2004	1.7919	0.106182	0.45504	587	0.100367	3739.9	1.84475	0.04	0.012777	0.0521679	5006.54	3171.06	8381.42	6809	0.352275	2398.64	4410.36	5366	17934	11897	19994	10462	7654	14289	8514	23482	17877	12022	10426	18918	10871	17386	12653	13435	13399	13272	86376	278676	1215442	171407	336335	286150	256342	50449	46615	176780	29137
Hebei	3	2005	2.4361	0.101949	0.498791	142	0.103334	4043.37	1.98817	0.039	0.012553	0.052764	5601.85	3481.6	9107.1	6851	0.3769	2582.14	4268.86	5988	21913	13087	22974	11815	8523	16183	9324	27176	21750	14127	11962	22403	12011	18753	14513	15266	14591	14776	85056	275921	1203315	174403	339374	270288	255651	50559	46612	181202	29160
Hebei	3	2006	2.626	0.096396	0.529647	884	0.108371	7659.99	2.07134	0.038	0.012757	0.0543773	6301.48	3801.8	10304.6	6898	0.3844	2651.59	4246.41	6622	25719	14985	26282	13249	9539	17510	10398	26628	22699	15593	12474	25895	12929	22506	16060	16829	15290	15908	82405	276510	1213562	181156	358075	252680	257107	50138	52728	190608	28707
Hebei	3	2007	2.8367	0.14955	0.559223	1120	0.114592	7845.76	2.20192	0.038	0.012675	0.0576459	7270.73	4293.4	11690.5	6943	0.4025	2794.56	4148.44	7677	30703	17195	32358	15112	10724	21953	11433	28605	27390	18304	14131	29277	14698	23838	20214	19920	17689	20147	78925	266949	1222293	184323	338382	236891	250928	48853	55957	196160	29264
Hebei	3	2008	2.9329	0.157408	0.59869	1360	0.123415	7965.05	2.34586	0.04	0.015024	0.0597247	8418.01	4795.5	13441.1	6988.82	0.419	2928.32	4060.5	9618	37249	21037	36434	18210	13465	25666	13780	32113	32649	21868	17300	36825	18069	29992	25592	23770	21340	25035	74899	280926	1163827	195040	345598	231690	256907	47748	55823	221543	32133
Hebei	3	2009	3.2159	0.172353	0.608635	1850	0.13072	8105.22	2.45943	0.039	0.015495	0.0625048	9264.2	5149.7	14718.3	7034.4	0.43	3024.79	4009.61	11330	42784	23870	39846	20066	16738	29787	15441	36830	36989	24945	18750	42809	20093	34617	29605	27678	24762	28395	70711	270216	1169822	198460	339425	221463	254790	45261	60454	234191	32804
Hebei	3	2010	3.4425	0.257929	0.550602	1950	0.290861	8222.91	2.54263	0.039	0.015291	0.0650929	10543.9	5958	16263.4	7193.6	0.445	3201.15	3992.45	12423	49514	27894	45478	23159	19780	33141	17314	38840	45176	27894	21159	49179	21663	34932	33588	30645	26208	29923	66360	277623	1196714	199376	365283	225492	251018	45294	62510	242448	41637
Hebei	3	2011	4.0887	0.178839	0.691981	2490	0.471997	8362.55	2.62747	0.038	0.015469	0.06771	12214.4	7119.7	18292.2	7240.51	0.456	3301.67	3938.84	12878	57900	32695	51664	27425	24449	38548	21791	46842	53190	30640	23881	59318	23982	40374	36128	33150	30311	31284	57072	284170	1.30577e+06	202074	506197	234736	243789	52683	58589	238344	48988
Hebei	3	2012	4.4198	0.128024	0.710577	2880	0.612033	8686.47	2.72219	0.037	0.015506	0.0704393	13913.6	8081.4	20543.4	7287.51	0.468	3410.55	3876.96	13669	62061	36613	58708	31241	28151	45696	25645	50628	60304	35670	26686	58892	27314	41946	38701	37427	33453	33498	55239	287978	1453747	212466	814008	263272	243019	67824	65019	246544	68395
Hebei	3	2013	4.3527	0.098898	0.758035	2860	0.620352	9296.32	2.83544	0.037	0.016092	0.0928807	15587.7	9101.9	22580.3	7332.61	0.4812	3528.45	3804.16	13859	61544	40169	63938	34670	32091	46599	27464	69718	65547	38716	37884	61114	27926	28024	41021	39382	36423	35150	52407	282686	1503358	196189	906173	288563	275895	69333	86275	256396	91472
Hebei	3	2014	4.2189	0.086927	0.764403	3110	0.631969	9547.15	2.92485	0.036	0.015981	0.0938321	17070.2	10186.1	24141.3	7383.75	0.4933	3642.4	3741.35	15559	59363	43950	69985	37027	35398	52425	28971	83469	73130	39631	38724	63937	30674	31614	44646	43843	39789	38656	45579	272604	1477010	192078	890488	282444	289603	62678	85587	276627	105257
Hebei	3	2015	4.3647	0.059785	0.768521	3370	0.641192	9832.34	3.07241	0.036	0.015892	0.0922359	18802.2	11050.5	26152.2	7424.92	0.5133	3811.21	3613.71	19685	54725	47678	75489	39182	37909	57090	32836	93983	74795	42697	40070	69744	36264	33368	57273	51967	45994	48923	41712	246381	1408507	187123	843639	271404	291791	58072	88465	299102	109780
Hebei	3	2016	4.2963	0.062549	0.770612	3610	0.649143	10038.9	2.12274	0.0368	0.016064	0.0925575	20626.6	11919.4	28249.4	7470	0.5332	3983	3487	21876	55184	50970	77162	42662	40256	59527	34357	109196	75708	46867	39232	74020	40292	35634	63967	58566	51507	56101	38868	227719	1.36324e+06	187943	818486	268764	286719	54220	84213	321685	121285
Hebei	3	2017	4.353	0.07443	0.770912	3860	0.666253	10212.7	2.24077	0.0368	0.016091	0.0930773	22599.5	12880.9	30547.8	7519.52	0.5501	4136.49	3383.03	23327	60268	58479	84590	51771	46280	67700	38465	84317	77845	57196	45988	81947	42366	36813	70456	64190	58934	61994	34586	198094	1.02554e+06	178587	382765	177737	242689	33612	75299	346430	63482
Hebei	3	2018	4.6127	0.074937	0.784519	4240	0.674656	10295.8	2.34078	0.033	0.016146	0.0985093	24722.3	14030.9	32977.2	7556	0.5643	4263.85	3292.15	23402	75134	65363	91575	55152	50568	75091	42478	86861	77491	59580	51738	93052	43298	39223	77715	71854	66123	66433	25427	180508	983734	178383	481235	189728	245802	41049	83758	361434	83213
Hebei	3	2019	4.5353	0.085406	0.8	3290	0.682117	10494.6	2.43381	0.031	0.01607	0.100779	27107.2	15373.1	35737.7	7591.97	0.5762	4374.49	3217.48	27537	82243	68754	100405	60547	56341	87130	46577	94052	86168	62631	52085	90917	44546	41923	79379	74784	71743	68850	26534	164847	950671	187187	432055	205701	274703	44919	101197	370462	104200
Shanxi	4	2003	2.4881	0.077711	0.373111	634	0.109964	4038.52	0.957371	0.03	0.013579	0.0566558	4145.38	2299.2	7005	3314	0.392321	1300.15	2013.85	7736	12871	8944	12468	9169	6178	13894	6250	17953	15103	9472	8353	13109	7969	6714	11648	10915	10826	11239	41080	569349	760979	114585	208716	252993	218380	36941	26649	117168	13616
Shanxi	4	2004	2.3542	0.06391	0.365173	840	0.112956	4210.68	1.10464	0.031	0.016792	0.0571373	4963.94	2589.6	8428.81	3335	0.40662	1356.08	1978.92	8655	17220	10612	14415	10466	7220	16203	7162	21953	17937	10349	10156	15755	9436	6785	13375	12142	12386	12784	39826	637339	740516	116139	200401	235636	215985	35581	35237	115117	13594
Shanxi	4	2005	3.4056	0.080475	0.370563	954	0.114286	7116.25	1.17855	0.03	0.017586	0.0588483	5427.07	2890.7	8913.9	3355	0.4211	1412.79	1942.21	10406	22403	12820	18677	12420	8319	18935	9396	20705	20965	10925	10796	17337	10772	11368	15149	13866	15247	14741	36152	662856	721656	100909	207800	210110	199722	40015	40962	120673	13416
Shanxi	4	2006	4.284	0.039479	0.422361	1190	0.144267	7225.21	1.22959	0.032	0.016593	0.0604444	6125.71	3180.9	10027.7	3375	0.4301	1451.59	1923.41	11806	26925	14764	21918	14349	9513	20950	8797	21220	22080	11999	12087	19008	11973	13950	17478	15482	17130	16495	35418	682438	730041	102813	201127	191708	215791	35237	38891	121073	13554
Shanxi	4	2007	4.3945	0.085354	0.461088	1530	0.149337	7669.16	1.28537	0.032	0.017389	0.0617878	7143.76	3665.7	11565	3393	0.4403	1493.94	1899.06	13841	30893	16988	27844	16669	12054	25195	10515	27756	27532	13622	14078	23433	13350	13413	20412	17969	18741	19799	35228	700119	757936	105856	203139	185864	227119	39811	43842	128110	15087
Shanxi	4	2008	4.5896	0.089861	0.486832	1820	0.158158	7982.92	1.34074	0.033	0.017885	0.0629225	8166.98	4097.2	13119.1	3410.64	0.4511	1538.54	1872.1	16566	37851	20268	33920	19744	13835	29422	11934	26204	31352	15919	15918	27614	14378	15395	24061	20590	21277	24100	34965	716699	703284	105810	198258	178634	220513	41054	45620	138977	14688
Shanxi	4	2009	5.008	0.072003	0.489687	2390	0.164587	8146.51	1.43427	0.039	0.018381	0.0638538	8729.27	4244.1	13996.6	3427.36	0.4599	1576.24	1851.12	17957	42197	21806	37103	21912	16073	31851	13455	30912	35447	15938	17599	30334	15831	18678	27573	22302	23631	25275	25834	750272	697921	99074	225487	178844	212726	42127	42873	139896	26841
Shanxi	4	2010	5.3681	0.081305	0.549301	2600	0.235247	8422.52	1.51295	0.036	0.018186	0.0651015	9979.23	4736.3	15647.7	3574.11	0.4805	1717.36	1856.75	20570	52252	25350	43023	25936	18890	37888	15064	33916	47037	17847	19819	33847	16657	20623	30620	24049	24927	27751	32007	796138	717355	99414	225162	175876	203545	42315	41225	137879	25818
Shanxi	4	2011	6.0855	0.068906	0.571731	3060	0.448532	8624.95	1.61879	0.035	0.018368	0.0658497	11822.6	5601.4	18123.9	3593.28	0.4968	1785.14	1808.14	23573	64539	30182	50878	30399	23613	44355	17239	35697	55125	21937	24091	37549	19454	22575	35039	28405	29377	30012	32430	857000	701940	103351	251356	180713	218726	48883	49342	150372	20608
Shanxi	4	2012	6.5549	0.060348	0.607354	3600	0.590114	8814.52	1.7365	0.033	0.018555	0.0679392	13561.2	6356.6	20411.7	3610.83	0.5126	1850.91	1759.92	25293	71541	34941	57327	36538	30325	49792	29378	38562	62678	29753	26892	42554	21259	22565	38425	32386	33307	32672	28246	902565	702927	111272	387767	191635	223140	69215	52745	157731	26119
Shanxi	4	2013	6.374	0.078228	0.682132	3580	0.607802	8920.92	1.84863	0.031	0.019285	0.070607	15196.3	7153.5	22455.6	3629.8	0.5256	1907.82	1721.98	29661	68633	36683	63435	36719	32802	54751	22924	49299	67729	32837	31191	50793	22506	27476	41695	35993	36348	37173	21983	1030136	731369	114783	384486	212002	236392	55567	60181	156064	32293
Shanxi	4	2014	5.8325	0.034707	0.692534	3560	0.611136	8985.03	1.94943	0.034	0.019463	0.0736059	17017.8	8809.4	24069.4	3647.96	0.5379	1962.24	1685.72	34230	65904	39868	68142	40504	37693	60187	24082	56094	74778	37991	34270	51919	24342	30467	45722	39653	40133	40502	20227	985224	691336	118489	355429	190499	245916	50174	54986	156207	35868
Shanxi	4	2015	5.6012	0.049119	0.704797	3820	0.615291	9018.55	2.03407	0.035	0.02156	0.0780471	18464.4	9453.9	25827.7	3664.12	0.5503	2016.37	1647.75	41729	58198	41093	72867	42494	37986	64505	26710	60160	75620	40538	36611	58390	28074	36933	58974	48349	47387	49859	18181	953335	654168	116835	333401	174652	241216	42145	55397	168227	36116
Shanxi	4	2016	5.1414	0.075961	0.724136	4350	0.627322	9089.32	1.08165	0.035	0.021727	0.0840263	19789.9	10082.5	27352.3	3682	0.5621	2069.65	1612.35	45871	55921	42314	73827	46632	38854	68837	28630	64686	75683	42950	37776	60446	29411	36307	62548	51145	49041	54484	17389	910853	637631	125355	294152	170781	234470	39338	49690	178822	34821
Shanxi	4	2017	5.013	0.048686	0.722354	4590	0.635575	9139.79	0.871287	0.034	0.02161	0.088844	21306.1	10787.5	29131.8	3702	0.5734	2122.73	1579.27	51930	65334	48800	77582	50384	43710	76471	31030	77870	80556	47814	42939	67918	30961	38547	67798	56466	53992	59443	16464	893162	639914	129051	291688	148286	234515	36855	48649	185789	37591
Shanxi	4	2018	5.218	0.034507	0.813519	4840	0.650054	9169.93	0.931957	0.033	0.022324	0.0940571	23014.3	11750	31034.8	3718	0.5841	2171.68	1546.32	52156	73380	53209	81956	54673	50456	87933	33394	83095	84811	53859	46401	78056	33560	45259	72783	64300	57050	63096	13567	883731	603351	130217	297125	157164	214169	34849	48734	208065	36494
Shanxi	4	2019	5.2432	0.103409	0.809972	4560	0.670233	9231.16	1.00611	0.027	0.02199	0.0971928	25026.8	12902.4	33262.4	3729	0.5955	2220.62	1508.38	45934	81324	57348	87122	60309	59115	93627	35024	84761	80289	53620	49040	79001	35325	47450	70640	71111	58952	63262	9769	815141	563525	158309	289929	136106	210564	35494	52343	299985	54959
Inner Monglia	5	2003	3.6339	0.107577	0.475772	1130	0.126153	626.669	1.2421	0.045	0.011316	0.0534872	4423.87	2267.7	7012.9	2386	0.45439	1084.17	1301.83	6829	9760	10050	17942	8297	7867	13604	7516	17367	14060	10858	12511	14060	10235	7257	13383	13353	13664	13886	323278	168516	449714	88954	130495	84064	164931	26095	25116	75733	14585
Inner Monglia	5	2004	3.4501	0.083148	0.485869	1630	0.133305	642.232	1.37941	0.0459	0.012954	0.0519313	5330.7	2606.37	8488.13	2393	0.463183	1108.4	1284.6	7672	12627	11438	23852	9677	9609	15917	9462	20568	17228	12438	13595	15889	10848	8347	15578	15361	16282	16316	306232	170084	437067	90951	125274	80546	165755	26568	27100	76507	16354
Inner Monglia	5	2005	5.004	0.120246	0.502141	1710	0.141074	1052.11	1.51484	0.043	0.013733	0.0509057	5890.71	2988.9	9136.8	2403	0.472	1134.22	1268.78	8587	16184	14497	30661	11574	11596	19124	14215	24579	20812	13397	16763	19109	13062	10239	18049	17633	19359	18440	300880	174526	440048	91479	130248	74459	158951	26257	24840	80678	13962
Inner Monglia	5	2006	5.3519	0.154009	0.528767	2030	0.147826	1088.44	1.66567	0.0413	0.014907	0.0513959	6754.53	3341.9	10358	2415	0.4864	1174.66	1240.34	10148	21582	15678	32959	13290	13631	22570	12004	25962	23521	15145	17398	23721	14624	19671	21289	20414	20776	20336	292069	171301	423852	93947	143900	73196	150514	26193	30924	83364	13895
Inner Monglia	5	2007	6.359	0.142354	0.548631	2720	0.152738	1171.68	1.82433	0.04	0.014821	0.0532455	8178.09	3953.1	12377.8	2429	0.5015	1218.14	1210.86	11574	27317	19127	36701	15438	15051	26108	13384	26459	28643	17735	19395	28080	18272	22495	25397	24092	23702	24354	290960	173416	417716	93913	155651	72453	159154	26294	35597	85582	14784
Inner Monglia	5	2008	6.7914	0.138286	0.581586	3230	0.159348	1245.04	2.35435	0.041	0.015955	0.0566363	9711.58	4656.2	14432.6	2444.33	0.5171	1263.96	1180.37	13189	32123	22352	40921	17679	18470	31163	16108	29325	35824	20480	22445	31047	20209	27723	30434	28880	27861	29791	277455	172933	393337	97311	134085	68274	158522	24551	37490	90234	15067
Inner Monglia	5	2009	7.7886	0.142857	0.599772	4070	0.167194	1274.35	2.52459	0.0405	0.016679	0.0599238	10764.5	4937.8	15849.2	2458.22	0.534	1312.69	1145.53	15017	37156	25603	44207	23219	21699	34578	18227	32557	40945	23424	26737	35184	24784	30494	37305	33610	32545	34825	267714	178762	377575	100738	136943	65751	162429	22777	39079	99186	14467
Inner Monglia	5	2010	8.6095	0.132927	0.616724	4850	0.242458	1335.54	2.75788	0.039	0.017798	0.0632651	12283.2	5529.6	17698.2	2472.18	0.555	1372.06	1100.12	18292	42248	30024	48860	24946	24342	39991	21335	37530	45588	26475	31840	40047	27729	39550	43397	38375	37805	40338	266890	184798	372494	101427	135521	67495	162826	23644	39103	101227	15442
Inner Monglia	5	2011	10.5705	0.087402	0.648811	6450	0.304629	1360.9	2.94734	0.038	0.018939	0.0634357	14435.9	6641.6	20407.6	2481.71	0.5662	1405.14	1076.57	22939	51159	36330	52587	28612	28651	47775	25385	40857	55530	33144	37799	45750	31597	43476	50992	44996	44326	47346	261925	205471	400111	110773	167148	75949	164026	26825	41958	104429	20054
Inner Monglia	5	2012	11.1683	0.064819	0.671525	6830	0.493243	1384.3	3.11782	0.0373	0.019278	0.0644219	16583.5	7611.3	23150.3	2489.85	0.5774	1437.64	1052.21	26573	59315	41503	59148	33070	37396	53487	30529	45675	63880	39512	41541	48062	36403	32844	56242	51009	49701	51547	249880	214738	426678	119724	182466	79761	169479	28903	44060	107915	18434
Inner Monglia	5	2013	10.8737	0.069842	0.732341	7210	0.511209	1416.02	3.32699	0.0366	0.019619	0.0669306	18518.3	8595.7	25496.7	2497.61	0.5871	1466.35	1031.26	29501	69278	45338	64325	37575	40609	57041	31958	54434	69426	39964	44301	56780	38722	36346	61981	56148	52312	55697	240787	215410	475162	133555	254938	113577	216843	45914	58542	110766	48378
Inner Monglia	5	2014	10.3328	0.045158	0.763942	7590	0.513771	1455.34	3.58175	0.0359	0.019962	0.0694361	20910.3	9976.3	28349.6	2504.81	0.5951	1490.61	1014.2	32463	68787	48582	69403	41489	42902	62134	34050	61123	73866	40512	44270	60716	39460	38733	63758	58738	54827	56832	238322	203776	462809	139913	229116	105005	213081	42596	50222	113302	50271
Inner Monglia	5	2015	10.1694	0.026088	0.760369	8360	0.522891	1482.45	3.8169	0.037	0.021107	0.0736615	22726.3	10775.9	30594.1	2511.04	0.603	1514.16	996.883	35597	69067	50655	73717	41132	45942	64232	36285	65420	76093	42023	45702	62973	41682	40348	71528	62665	60979	62272	235519	179088	466873	142492	215754	96096	206365	40691	50240	115712	53951
Inner Monglia	5	2016	10.0242	0.01587	0.759123	9520	0.552063	1657.32	3.40589	0.0365	0.021032	0.0775578	24682.8	11609	32974.9	2520	0.6119	1541.99	978.012	37569	72654	53670	78757	42968	48831	67389	37499	67444	78570	43850	45155	65192	41715	38082	77184	68009	65311	67867	228845	165778	438517	145493	189409	89121	227777	36938	48486	117685	54800
Inner Monglia	5	2017	9.2546	0.025371	0.750516	9890	0.568486	1685.74	3.62722	0.0363	0.020957	0.0818031	26902.1	12584.3	35670	2529	0.6202	1568.49	960.514	40422	85135	60655	83080	49456	52288	74613	39620	74162	81065	45374	48914	71086	44472	38380	81643	72473	69346	72167	219661	141488	363066	136272	164265	86590	210957	36365	48245	117488	56294
Inner Monglia	5	2018	9.0031	0.029777	0.737938	10300	0.585399	1712.94	3.87722	0.0358	0.020916	0.0861827	29167.9	13802.6	38304.7	2534	0.6271	1589.07	944.929	43644	107498	69879	94454	51833	61651	82016	44045	84163	88289	46733	53124	80623	45647	46717	85643	76424	71777	74210	182322	135570	325414	139932	134117	83015	200954	31020	48823	145312	50355
Inner Monglia	5	2019	8.6221	0.053995	0.774173	10200	0.603097	1742.09	4.15634	0.037	0.02087	0.0910033	31442	15282.8	40782.5	2539.56	0.6337	1609.32	930.241	54445	120107	75457	101391	54811	66035	91513	44381	91272	88020	50721	57182	88303	52386	45347	88682	80379	78895	76524	86179	144562	307896	146253	129394	82533	199034	28506	46988	206547	56656
Liaoning	6	2003	4.0836	0.206708	0.578197	831	0.254252	3433.52	0.851244	0.065	0.01639	0.054226	5387.74	2934.4	7240.6	4210	0.569723	2398.54	1811.46	4990	13756	12206	18559	9660	10466	14688	10123	35486	20171	13394	11915	17600	10623	9804	13704	14073	15327	14650	267643	307408	1511188	170382	308744	196994	336682	61038	48470	187659	61981
Liaoning	6	2004	3.882	0.197599	0.605723	996	0.261086	3592.53	0.910601	0.065	0.016599	0.0519353	6430.03	3307.14	8706.46	4217	0.578386	2439.05	1777.95	5637	16596	14099	21256	11235	12436	16579	11235	36976	24198	14659	13111	19441	11538	11461	15787	15584	16437	16570	289175	311089	1504831	170610	308854	181910	332141	63409	50911	182710	63232
Liaoning	6	2005	5.0661	0.231521	0.620679	1260	0.282777	3668.33	1.10023	0.056	0.017768	0.051339	6870.21	3690.2	9107.6	4221	0.587	2477.73	1743.27	6162	19655	16241	24025	12743	14213	19521	12360	38283	28542	15343	15167	23775	12697	13274	18583	18097	19771	20053	287828	304953	1503547	169270	283012	168857	330240	61168	51156	182306	61825
Liaoning	6	2006	5.1065	0.201683	0.625201	1450	0.292391	6661.48	1.139	0.051	0.018029	0.0517727	7794.5	4090.4	10369.6	4271	0.5899	2519.46	1751.54	6619	23900	18515	26112	15194	16691	22219	13683	39360	28549	16635	12918	26377	13672	15524	20297	20355	22095	21414	289231	301785	1472688	166276	294844	160892	338440	59478	51012	186951	64330
Liaoning	6	2007	5.4646	0.211238	0.684713	1700	0.302396	6723.85	1.10745	0.043	0.018148	0.0554169	9229.38	4773.4	12300.4	4298	0.592	2544.42	1753.58	7354	27349	21572	31145	17118	19242	24998	14222	41454	34247	18814	14504	31480	15352	15919	26039	23512	24959	27519	299052	299930	1.45719e+06	170342	276492	142337	338364	64231	55969	196076	59824
Liaoning	6	2008	5.5759	0.185128	0.603774	2020	0.325886	6932.42	1.18514	0.039	0.019235	0.0587625	10870.6	5576.5	14392.7	4315	0.6005	2591.16	1723.84	7517	36040	25669	34361	20891	22694	28745	16624	49237	39968	22408	17420	37816	18975	18338	31762	27657	29565	31561	312985	335633	1469581	169502	284473	154789	337793	65386	61269	206469	65443
Liaoning	6	2009	6.0564	0.155808	0.627402	2530	0.335729	6930.57	1.24506	0.039	0.024649	0.0606543	11874.4	5958	15761.4	4341	0.6035	2619.79	1721.21	8832	35463	28218	36322	24399	25715	32639	18331	53818	45038	25727	21352	42903	23254	21408	38221	32341	34781	33998	276091	354627	1460104	162517	294679	171450	317787	67091	60775	201945	74586
Liaoning	6	2010	6.6982	0.195724	0.667345	2740	0.375703	6959.9	1.35635	0.036	0.0256	0.0624564	13617.6	6907.9	17712.6	4375	0.621	2716.88	1658.12	10040	41238	32126	42658	27535	28616	38451	21613	56013	53676	28147	24598	48030	24753	25101	41656	36638	36478	36941	279344	351886	1.44823e+06	165861	311940	169184	302229	63793	70266	206506	88233
Liaoning	6	2011	7.9979	0.167363	0.704061	3420	0.531394	7129.95	1.52314	0.037	0.025553	0.0645003	16091.6	8296.5	20466.8	4383	0.6405	2807.31	1575.69	11478	49014	36417	46134	30332	31952	43728	26046	60766	60859	32183	28859	54741	26725	28378	44795	40713	40272	39177	265356	330724	1.67572e+06	170988	478874	220302	329403	73019	84659	224191	115356
Liaoning	6	2012	8.8097	0.13672	0.713611	3870	0.605013	7174.71	1.77631	0.036	0.025518	0.0679318	18469	9383.7	23222.7	4389	0.6565	2881.38	1507.62	12050	54082	39507	51600	34379	35462	51268	30494	66914	69453	36022	30353	55447	27866	32718	47968	44874	43515	41363	251729	325541	1683199	164475	609206	210939	328067	72453	90064	225181	123697
Liaoning	6	2013	8.8429	0.144946	0.747096	3870	0.632415	7544.35	1.89327	0.034	0.026196	0.0709066	20527.1	10522.7	25578.2	4390	0.6645	2917.16	1472.84	13058	56411	45416	55207	38992	40569	55620	33121	72837	73851	44905	34439	59624	29565	34562	50032	48430	46818	42162	233243	340321	1794581	164508	1120518	277169	376584	80807	127133	232089	140409
Liaoning	6	2014	7.7262	0.114103	0.756767	4100	0.637941	7911.58	1.88702	0.034	0.026418	0.0749663	23186.9	11191.5	29081.7	4391	0.6705	2944.17	1446.83	12976	58246	49585	59557	40115	43444	59951	37156	78751	77949	46517	37387	62443	29722	34864	51281	50054	46833	43248	231340	312939	1669224	158588	1023163	267409	375739	73650	129648	244410	145229
Liaoning	6	2015	6.1009	0.103675	0.741658	4340	0.642296	8181.08	2.08519	0.034	0.02647	0.0788516	24899.7	12056.9	31125.7	4382.4	0.6735	2951.55	1430.85	14360	56332	51623	65747	42319	45681	65044	37435	83665	83537	49813	41209	66150	32406	36726	61114	56455	49918	50389	224708	287466	1506278	145850	836715	257685	361120	67539	132887	260117	132944
Liaoning	6	2016	5.716	0.054775	0.735803	4800	0.648675	8203.43	1.62795	0.038	0.026496	0.0809994	26351.6	12880.7	32876.1	4378	0.6737	2949.46	1428.54	15497	55363	56546	69357	43585	47382	66657	38871	88995	80323	53808	43422	70180	34416	39022	66890	62230	52202	55348	226549	247401	1.31733e+06	146877	646126	226351	351628	62184	125846	270029	119708
Liaoning	6	2017	5.6518	0.046655	0.757858	5260	0.683452	8342.84	1.67373	0.038	0.026322	0.0815504	28086.1	13746.8	34993.4	4369	0.6749	2948.64	1420.36	17027	63317	61816	69704	46908	50767	71405	43026	91990	85433	56945	47523	74469	36594	41686	73080	68716	55137	59802	214709	236861	1177764	139638	502194	204377	355545	58277	129036	283071	103637
Liaoning	6	2018	5.7153	0.101789	0.786231	6190	0.696398	8551.54	1.61306	0.039	0.026382	0.0851379	30105.2	14656.3	37341.9	4359	0.681	2968.48	1390.52	17745	71361	69256	75515	55093	56331	77054	47145	99280	87377	62574	49663	86988	42023	51329	76151	71596	65567	64605	194652	216343	1121030	163492	377755	202133	329713	56057	128051	284729	104816
Liaoning	6	2019	5.5844	0.115699	0.8	5290	0.708666	8487.32	1.69612	0.042	0.026426	0.0870727	32229.2	16108.3	39777.2	4351.7	0.6811	2963.94	1387.76	17327	79183	73247	78854	59362	61051	85944	40960	106814	90944	63703	51148	98090	42631	45855	83173	79344	68134	69647	171776	196287	1103992	157557	323985	188089	329225	50737	136899	335277	106964
Jilin	7	2003	3.3375	0.121324	0.565082	1070	0.157914	2348.29	0.937134	0.043	0.014793	0.0548114	4831.38	2530.4	7005.2	2704	0.514209	1390.42	1313.58	5503	11859	11129	15206	8716	6935	10909	8357	21777	15559	11596	11824	14140	8758	12335	12950	11771	11542	12274	209069	149916	739370	81342	165404	146905	256349	28142	26061	95569	28285
Jilin	7	2004	3.1722	0.129092	0.599898	1290	0.162054	2521.61	1.01452	0.042	0.015504	0.0493804	5716.21	2999.62	8226.78	2709	0.519707	1407.89	1301.11	5788	15777	13103	16779	9488	7241	11445	8622	24806	17493	12518	12829	14980	9685	11454	14323	12958	12253	13440	209734	148719	664020	80163	155411	152044	245268	31861	27500	92867	29135
Jilin	7	2005	4.1709	0.114488	0.644635	1550	0.167873	2684.53	1.1407	0.042	0.0162	0.0496343	6114.05	3264	8690.6	2716	0.5252	1426.44	1289.56	6397	19139	14503	19581	10608	10123	15498	10109	25690	20381	13212	16679	18252	9900	11396	15684	14109	14300	15456	203166	134597	603770	79998	135004	95845	178745	30747	30921	92692	28373
Jilin	7	2006	4.1301	0.142541	0.659291	1690	0.176364	4506.08	1.22752	0.042	0.016526	0.0506593	6890.28	3641.1	9775.1	2723	0.5297	1442.37	1280.63	7866	22018	16643	21489	11801	12877	17180	11466	25792	21709	14626	16750	19956	10964	14479	17875	15412	15710	17281	188010	168240	597256	81612	144516	93712	178280	29320	33063	89450	32609
Jilin	7	2007	4.519	0.189774	0.678367	2270	0.183778	4559.5	1.31224	0.039	0.016117	0.0529551	7962.58	4191.3	11285.5	2730	0.5316	1451.27	1278.73	9402	24294	21004	25604	14177	15135	20111	12726	29933	27335	16795	20118	26013	12972	12995	23363	19908	19468	22594	179649	176460	580098	79932	137659	87322	159437	29301	33574	91148	34731
Jilin	7	2008	4.9088	0.120321	0.685407	2780	0.194499	4647.76	1.40698	0.04	0.020116	0.0562071	9134.59	4932.7	12829.5	2734.21	0.5321	1454.87	1279.34	12039	29163	24036	28807	16017	17642	23845	14920	29854	30675	18539	22500	30112	14585	13479	26372	22555	21842	24427	166065	176101	569681	80836	137452	84454	157337	29396	36413	93082	33685
Jilin	7	2009	5.4145	0.121924	0.696874	3470	0.202332	4718.78	1.56472	0.04	0.020076	0.0589607	9926.28	5265.9	14006.3	2739.55	0.5332	1460.73	1278.82	13636	31757	26119	29419	19408	20018	26539	14881	30803	36473	21227	23041	33927	15926	16190	29305	25948	25159	27164	162252	182677	590414	80878	129397	82292	153194	31386	50929	98575	33516
Jilin	7	2010	5.8844	0.15297	0.697812	4000	0.249836	4825.88	1.6741	0.038	0.020389	0.0586649	11131.8	6237.4	15411.5	2746.6	0.5335	1465.31	1281.29	15220	33584	31153	33044	21165	22999	30422	17594	33772	43174	23153	23918	38732	18375	17511	31548	28476	26684	29247	166900	155909	607685	81981	134348	89413	145051	30288	52094	102438	35819
Jilin	7	2011	6.7606	0.221541	0.707202	4730	0.373753	4896.16	1.83808	0.037	0.020732	0.0575501	13003	7510	17796.6	2749.41	0.534	1468.18	1281.23	19467	35981	35704	35601	26578	27082	38722	21901	38956	54512	27748	31161	46102	20112	27373	36211	33065	30467	31765	162662	147843	649457	89537	133745	93824	142939	31427	57888	105249	52924
Jilin	7	2012	7.2722	0.210531	0.715649	5450	0.433937	4973.75	2.00615	0.037	0.020724	0.0583788	14832.7	8598.2	20208	2750.4	0.537	1476.96	1273.44	21126	40363	40216	41850	31185	31326	45290	25042	44257	59995	33489	36187	49835	21804	31513	40918	41304	34017	36945	157076	166393	648257	88996	176383	95296	159175	30147	47340	109330	51316
Jilin	7	2013	7.2883	0.150967	0.736534	5450	0.471889	5027.64	2.16652	0.037	0.021081	0.0607232	16479.3	9621.2	22274.6	2751.28	0.542	1491.19	1260.09	23249	49884	46613	53553	35730	34569	48587	27189	49288	66938	38598	33392	49805	24552	28343	44988	44311	37367	38028	136648	153963	884034	140322	338694	128701	171587	32884	67365	110171	57257
Jilin	7	2014	6.934	0.135585	0.758016	5810	0.483763	5124.92	2.34692	0.034	0.021073	0.0682356	17597.2	10780.1	23217.8	2752.38	0.5481	1508.58	1243.8	25610	53814	52057	59153	37119	37522	54654	30091	56439	71894	39308	36692	53062	27992	32385	47658	46127	40313	40366	133150	142788	866905	134514	331902	125417	164287	30126	65783	114768	63078
Jilin	7	2015	6.9533	0.134912	0.775105	6170	0.492605	5193.49	2.56246	0.035	0.021065	0.0708605	18834.4	11326.2	24900.9	2753.32	0.5531	1522.86	1230.46	29744	51885	54452	66192	40803	40854	58488	32178	63448	75102	44444	40714	59844	31578	31535	58835	53409	50810	48061	128394	140798	842307	129966	292636	113612	165889	29519	65502	118287	60067
Jilin	7	2016	7.1022	0.111068	0.786276	6950	0.502744	5468.73	2.58032	0.035	0.021954	0.0723932	20186.8	12122.9	26530.4	2733	0.5597	1529.66	1203.34	33042	51883	58250	70925	44968	43419	62053	34173	64923	81958	44670	45219	62900	33912	32797	65436	63307	55335	54321	124934	130708	818555	123472	273170	116447	160708	28363	64105	120865	67708
Jilin	7	2017	6.9007	0.127108	0.791099	7730	0.545786	5544.08	2.79219	0.035	0.022819	0.0723423	21656.5	12950.4	28318.7	2717	0.5665	1539.18	1177.82	36826	56079	65067	75680	46222	47867	67910	38370	72064	87154	45979	46975	66857	37110	36572	71526	67048	57349	62216	114313	122392	709399	118834	236805	114147	162482	27868	62903	121523	69040
Jilin	7	2018	6.413	0.155668	0.820389	7770	0.572004	5624.28	3.01501	0.035	0.022929	0.0880698	23196.8	13748.2	30171.9	2704	0.5753	1555.61	1148.39	38397	66172	75058	86102	48961	52331	75599	40422	82963	92873	48165	51909	75661	41988	42265	75836	73939	63352	68069	97037	94305	568936	101901	185207	112427	148656	23435	58228	134325	60579
Jilin	7	2019	6.2475	0.104262	0.83	7800	0.588762	5691.57	3.25611	0.031	0.023042	0.0757355	25053.5	14936	32299.2	2690.73	0.5827	1567.89	1122.84	41750	71210	82545	89574	54213	56243	77879	42157	82785	88059	52865	53882	82234	40285	40297	82399	78940	65789	71691	70077	86412	508180	103665	149271	104203	163199	23217	56054	174926	60516
Heilongjiang	8	2003	2.9995	0.102848	0.475423	813	0.187235	1376.81	0.997905	0.042	0.014417	0.0719369	4698.84	2508.9	6678.9	3815	0.525165	2003.5	1811.5	5403	13466	10063	15702	10641	8400	12784	8528	26318	18407	11142	9069	14084	9898	6330	13808	13066	13977	14097	896888	386961	1136586	156309	405633	314098	325849	47579	39833	116501	44189
Heilongjiang	8	2004	2.8546	0.094738	0.54746	1150	0.193372	1412.71	1.08377	0.045	0.015457	0.0671637	5539.05	3005.18	7803.41	3817	0.528083	2015.69	1801.31	5839	15084	11240	18140	12151	9577	13831	10170	28554	20473	12693	10100	19336	10738	11754	16151	15169	15868	15491	894423	427977	1086961	154960	379913	279133	311849	38527	43531	113243	44575
Heilongjiang	8	2005	3.7904	0.109041	0.594774	1360	0.201289	1418.12	1.24694	0.044	0.01623	0.0623508	5903.49	3221.3	8272.5	3820	0.531	2028.42	1791.58	6444	18422	13129	20347	13458	11912	16385	11589	31427	24066	14113	12661	20862	10651	13062	17304	16568	16599	17880	889003	451055	1025364	153690	362170	215531	278569	37716	41206	114617	42773
Heilongjiang	8	2006	4.0972	0.067016	0.583065	1600	0.209521	2945.77	1.44603	0.043	0.017002	0.0613263	6564.4	3552.4	9182.3	3823	0.535	2045.31	1777.69	7093	21120	14998	21004	15926	14222	18936	13665	32034	24362	14214	13304	21992	10996	13653	19389	18262	17629	19289	905260	487905	994242	152375	361343	225545	276077	38681	44089	115411	49193
Heilongjiang	8	2007	4.3342	0.10646	0.599294	2120	0.216224	2979.05	1.57999	0.043	0.017782	0.0614793	7427.21	4132.3	10245.3	3824	0.539	2061.14	1762.86	8383	24144	17528	24826	17059	15681	21222	14724	33781	28110	16166	15700	25658	13046	15613	24674	22336	22033	23428	956910	488384	987024	149560	351855	213436	273327	36920	51211	116241	51189
Heilongjiang	8	2008	4.638	0.132524	0.606252	2610	0.224259	3189.13	1.76932	0.042	0.0183	0.0648592	8581.64	4855.6	11581.3	3825.04	0.554	2119.07	1705.97	10017	27869	21093	28481	19067	19052	24833	17790	35752	33742	17980	17961	34096	14295	21807	27495	25782	25543	27619	944111	439966	843675	145959	301221	193119	260091	31890	55013	121792	43625
Heilongjiang	8	2009	5.0694	0.108769	0.595572	3140	0.240538	3202.33	1.99774	0.043	0.020387	0.0656206	9291.16	5206.8	12566	3826.01	0.555	2123.44	1702.57	11079	33417	23894	32767	20610	21693	28074	19778	37803	37056	20254	21157	42405	16502	25848	31400	29432	28140	30699	928932	428056	786306	147709	299135	183445	261497	32713	53257	134821	42734
Heilongjiang	8	2010	5.5234	0.104112	0.624019	3650	0.282651	3212.37	2.1982	0.043	0.020609	0.0669592	10466.4	6210.7	13856.5	3833.35	0.5566	2133.64	1699.71	12916	39793	26764	36613	22904	25702	31501	20804	40416	42537	21881	28238	39938	18663	29803	34630	32095	29827	31568	929199	422324	667652	143476	270259	177025	251840	36667	55829	141723	49179
Heilongjiang	8	2011	6.6028	0.224341	0.646267	4960	0.328951	3289.47	2.45702	0.041	0.020344	0.0675944	12170.3	7590.7	15696.2	3834.01	0.565	2166.22	1667.79	15069	44726	31197	40677	26155	28649	37930	23462	45331	49143	26558	32841	47545	20115	35488	37095	36158	32918	34016	939292	434887	656688	146002	305816	163855	256259	37843	61206	146744	56163
Heilongjiang	8	2012	6.9744	0.098853	0.662561	5220	0.461889	3362.85	2.75521	0.042	0.020605	0.0684708	13813.6	8603.8	17759.8	3834.04	0.569	2181.57	1652.47	20830	49530	36787	46604	32089	33028	44616	30504	50042	55849	31379	36599	57107	23666	42918	39994	39712	36117	36472	932627	413269	633458	157331	356205	159010	256089	45601	61105	160117	58534
Heilongjiang	8	2013	6.9216	0.064607	0.711783	5480	0.489671	3387.02	2.96789	0.044	0.02086	0.0685577	15352.8	9634.1	19597	3835.02	0.574	2201.3	1633.72	23824	56637	39691	54211	36776	38401	50797	36746	55854	57390	36885	39156	60631	27025	49101	43527	43211	39644	39325	798991	384127	649885	182837	372165	197209	280785	48516	71042	159235	60459
Heilongjiang	8	2014	6.5473	0.050276	0.733978	5740	0.4988	3434.76	3.20322	0.045	0.020871	0.0721828	17504.8	10453.2	22609	3833	0.5801	2223.52	1609.48	25816	56472	43254	58085	37389	41602	56406	39387	59055	58112	40002	39918	62073	28993	52333	49503	47659	43083	43143	710984	359280	613082	180958	338497	187443	277461	45246	76385	169005	60346
Heilongjiang	8	2015	6.4852	0.04435	0.728342	6560	0.510481	3451.01	3.46576	0.045	0.02125	0.0746535	18802.4	11095.2	24202.6	3811.7	0.588	2241.28	1570.42	28592	54707	45422	62714	37948	44615	58601	42095	64070	65140	44447	44945	66168	32980	50275	62673	55776	50931	53007	655137	318638	573524	180621	311202	182075	274955	41511	73769	187020	59870
Heilongjiang	8	2016	6.1542	0.031487	0.742846	7370	0.521637	3477.84	3.63505	0.0422	0.035536	0.0763516	20063.4	11831.9	25736.4	3799	0.592	2249.01	1549.99	28782	59875	49775	64919	39922	48576	62977	44807	62707	64737	45376	48066	68514	35519	55411	68288	62122	55056	59837	667985	279101	519865	176015	284420	186170	271327	40433	72891	213468	61337
Heilongjiang	8	2017	6.2997	0.038895	0.751595	7920	0.539869	3509.28	3.77958	0.0421	0.021379	0.0772074	21444.8	12664.8	27446	3788.7	0.594	2250.49	1538.21	30638	68926	55497	68215	42200	50907	68747	48778	65370	66790	46693	56493	73978	36282	58569	72656	66627	58391	63684	677202	255592	456676	168343	247003	177763	270041	36859	81555	226548	62550
Heilongjiang	8	2018	5.869	0.058748	0.756167	8220	0.584495	3533.11	4.04032	0.0399	0.021468	0.076705	23051.6	13803.7	29191.3	3773	0.601	2267.57	1505.43	30926	79255	62891	72319	48414	52525	74935	50404	64022	66942	48982	67108	82607	38571	60090	77787	71719	62263	69260	656214	268514	386097	136521	214861	156808	250300	32438	79656	217173	64203
Heilongjiang	8	2019	5.7413	0.084472	0.812584	8000	0.608216	3566.81	3.59534	0.035	0.021593	0.078241	24703.3	14982.1	30944.6	3751.3	0.609	2284.54	1466.76	31754	90004	69173	80297	52767	60286	83090	40192	71471	69860	51173	70901	94140	41454	65339	84227	73454	63598	71516	407217	234219	301119	144566	174291	111888	257628	14195	88156	234283	57983
Shanghai	9	2003	10.9543	0.16112	0.731593	1130	0.405223	10292.1	0.573643	0.049	0.032276	0.0581463	13951.3	6653.9	14867.5	1766	0.888456	1569.01	196.987	15450	44197	25477	32330	24591	25038	25903	21168	62821	42544	32802	22990	30928	24850	18542	26601	28531	32090	30748	16686		1270417	56388	141015	266985	348139	85191	42267	148430	83268
Shanghai	9	2004	10.0386	0.133246	0.76374	1470	0.420111	12388.9	0.518698	0.045	0.032153	0.057393	17240.2	7066.33	18501.7	1835	0.889684	1632.57	202.43	17094	51226	27456	34926	29211	28288	29398	24411	58874	46269	33570	26215	36232	27720	19947	29111	31219	35287	33420	17018	601	1202269	55914	129767	256877	343244	85294	39546	134634	84676
Shanghai	9	2005	13.6454	0.07704	0.780526	1850	0.439158	12873	0.46557	0.044	0.031746	0.0591791	17510.7	8247.8	18645	1890	0.8909	1683.8	206.199	19390	68590	29835	40965	35034	32385	34354	26939	69572	54390	42309	30589	43200	31124	20338	32489	35511	40574	36765	14753	563	1186823	54464	132682	244275	328091	77532	42369	158334	81995
Shanghai	9	2006	12.7091	0.055495	0.793989	1880	0.454022	16495.2	0.437071	0.044	0.03055	0.06636	19365.1	9138.7	20667.9	1964	0.887	1742.07	221.932	22271	69929	34206	49670	37379	30174	34915	24255	74360	66016	33461	32351	47822	29508	20762	37819	41849	43701	41018	12994		1177079	53539	128585	219972	321882	76773	44296	171376	78557
Shanghai	9	2007	13.4381	0.013143	0.8	1890	0.451744	24536.5	0.420182	0.042	0.02907	0.0783886	22099.7	10144.6	23622.7	2064	0.887	1830.77	233.232	26646	58727	37975	62211	46188	38402	43776	27582	83317	92914	37436	39673	61501	33721	24712	45833	51297	51651	48285	13401	697	1420853	54115	126550	228460	331253	82389	51840	193211	95501
Shanghai	9	2008	12.3193	0.050413	0.814099	1960	0.452061	18249.2	0.389292	0.042	0.028496	0.0893094	24938.2	11440.3	26674.9	2140.64	0.886	1896.61	244.033	29615	61381	42311	72262	55114	49606	47143	28323	91097	116636	45459	43996	75642	40055	17975	56221	62764	55888	58721	12148	837	1.43037e+06	55062	110804	241116	340486	98469	56254	206546	106638
Shanghai	9	2009	12.4411	0.028545	0.793476	2220	0.452929	18525.4	0.392901	0.043	0.02986	0.0951577	26973.3	12482.9	28837.8	2210.28	0.886	1958.31	251.972	38093	59946	46672	83958	62308	52553	49847	29564	101367	134581	45903	53146	76108	41240	30875	61763	66826	62422	65919	13261	897	1407073	55589	110132	254025	356329	108191	65150	217125	114816
Shanghai	9	2010	12.1497	0.082341	0.79875	2430	0.468328	19006.3	0.422713	0.044	0.028663	0.0988751	29927.1	13978	31838.1	2302.66	0.893	2056.28	246.385	39575	62356	52163	93049	69051	61509	58405	32815	115524	155763	48306	60905	83338	44376	35226	69738	73470	68533	73073	15361	866	1413166	54099	113395	264288	363014	116677	67134	236320	111507
Shanghai	9	2011	13.5279	0.065049	0.812567	2600	0.623525	19181	0.422011	0.035	0.028115	0.114011	34071.6	16053.8	36230.5	2347.46	0.893	2096.28	251.178	45858	95958	61491	101211	59603	82882	65455	38462	120196	170086	62340	76802	120307	48431	43413	82315	92619	81409	89882	14023	535	1868255	61079	367537	475247	410319	167080	82032	277838	154854
Shanghai	9	2012	13.0928	0.034827	0.810682	2520	0.629172	19906.3	0.442471	0.031	0.028146	0.105181	37793.1	17803.7	40188.3	2380.43	0.893	2125.72	254.706	50484	103785	65032	113596	51894	91658	71062	40916	127888	174682	69810	82287	129633	52200	43525	85662	103905	83701	90622	12254	542	2187271	58306	488552	598371	379549	201344	85528	294556	152019
Shanghai	9	2013	12.9354	0.063602	0.816927	2570	0.625179	20052.4	0.449884	0.04	0.028156	0.105867	41328.7	19595	43851.4	2415.15	0.896	2163.97	251.176	55329	113338	71305	125279	65134	100692	77999	45169	153989	181909	67231	129430	141766	59119	54276	89333	107891	90056	91983	13418	526	2117904	52418	371768	668956	491586	210544	216511	300312	240280
Shanghai	9	2014	12.5863	0.079425	0.864147	2560	0.633101	20547.6	0.466959	0.041	0.028033	0.107873	45965.8	21191.6	48841.4	2425.68	0.896	2173.41	252.271	57514	114879	79795	143613	73620	107673	88929	49418	170174	195718	72185	135268	152258	63973	59289	96165	113142	96303	95569	23664	594	2060958	45872	372836	780104	513694	243925	247810	330296	255863
Shanghai	9	2015	14.4112	0.031578	0.881467	2690	0.651397	20944.4	0.397338	0.04	0.02774	0.109987	49272.1	23205.2	52961.9	2415.27	0.876	2115.78	299.493	62828	122414	86536	153467	80941	117396	98996	52999	183365	208658	82274	145659	158906	73137	62576	100865	117092	117099	100767	24828	615	1929316	42756	351496	782158	514541	240034	254422	337397	262148
Shanghai	9	2016	14.9554	0.055318	0.886234	2850	0.663926	21098.4	0.416638	0.041	0.026446	0.112167	53799	25520.4	57691.7	2420	0.879	2127.18	292.82	67322	142716	96813	163212	88034	127489	108905	56933	200657	226500	91814	151937	163297	78432	66280	106941	125181	129644	107325	24796	523	1810460	43719	329297	783592	510827	242978	267844	355147	253806
Shanghai	9	2017	15.0692	0.054723	0.888116	3230	0.672912	21146	0.409665	0.039	0.026468	0.112649	58318.9	27825	62595.7	2418	0.877	2120.59	297.414	69903	144454	105733	174252	96580	139627	116763	60153	212063	247568	98474	156621	176383	86441	67013	111090	138074	145257	118964	27646	545	1720932	41367	312508	800561	511430	255494	307312	341780	267351
Shanghai	9	2018	15.3294	0.03184	0.9	3510	0.681559	20706.3	0.415211	0.035	0.026403	0.116308	63552.2	30374.7	68033.6	2424	0.881	2135.54	288.456	71879	129162	115888	182129	110117	153932	125216	57848	232522	257723	103812	163418	191018	92165	74539	114749	150648	165573	129492	30995	662	1.61723e+06	39946	304748	844687	505838	304811	355812	333912	265978
Shanghai	9	2019	13.789	0.032836	0.9	2390	0.68641	20706.3	0.419652	0.036	0.026358	0.116688	68886.1	33195.2	73615.3	2428.14	0.883	2144.05	284.092	60642	271188	125664	204287	114798	157242	134369	60022	237405	258161	109697	161663	184920	95860	71832	136449	178711	161284	150631	76301	1186	1434850	34752	323785	989864	504331	299079	417680	378824	301223
Jiangsu	10	2003	2.7943	0.241704	0.807754	322	0.152213	6390.35	0.766121	0.041	0.012604	0.0601877	6599.48	4239.3	9262.5	7458	0.469856	3504.18	3953.82	7399	14530	13512	25000	13167	11452	17031	11869	32533	24173	16897	15931	23744	14964	16735	16549	18729	19550	21498	181408	165596	2254737	127061	263755	379023	344743	78914	57177	215092	66979
Jiangsu	10	2004	2.6378	0.228373	0.835825	465	0.161387	7627.88	0.791585	0.038	0.014888	0.0603568	7913.66	4753.85	11236.7	7523	0.487412	3666.8	3856.2	8030	18059	15146	29653	14697	14027	19781	13595	36754	29256	19033	17101	28124	16933	18866	18850	21884	23348	25400	164816	149777	2315379	138365	243377	316571	332725	84248	60196	229354	63350
Jiangsu	10	2005	3.7754	0.194324	0.852366	527	0.177333	8064.23	0.828214	0.036	0.015156	0.061098	8805.2	5276.3	12318.6	7588	0.5011	3802.35	3785.65	9064	21637	16937	34679	16118	16557	22280	15181	41445	35363	24664	19320	32640	18956	22411	21807	24884	28137	31328	154554	149100	2515686	140527	269962	288869	329808	86140	64625	222283	57886
Jiangsu	10	2006	4.0031	0.187514	0.864554	62	0.191981	12375.4	0.890291	0.034	0.015543	0.0615455	10105.9	5813.2	14084.3	7656	0.519	3973.46	3682.54	10181	26385	19647	39066	18260	19163	24811	16577	40801	36760	27991	21928	36220	20234	20691	25352	28718	31667	34765	146328	146998	2908478	130166	372339	273008	327445	87702	67894	229014	58774
Jiangsu	10	2007	4.4262	0.196908	0.871095	699	0.207471	13034.3	0.938599	0.032	0.015667	0.0639263	11783.6	6561	16378	7723	0.532	4108.64	3614.36	12030	29877	22510	45922	19928	21920	27887	18409	44754	44417	31207	24076	42391	23549	23387	30488	32792	36773	39758	139008	135306	3102738	133245	382241	265704	324183	91484	70404	235140	60532
Jiangsu	10	2008	4.6866	0.17035	0.878169	824	0.225655	13735.9	1.02351	0.033	0.015459	0.066002	13504.9	7356.5	18679.5	7762.48	0.543	4215.03	3547.45	14728	33111	25688	53702	23154	25458	30227	20557	45010	52051	34455	25442	48834	26865	25993	35205	37404	40249	48257	121573	135854	3073609	126598	383523	272603	319672	98820	72688	250466	59640
Jiangsu	10	2009	5.1215	0.095226	0.884401	1130	0.241106	14015.9	1.09886	0.032	0.01562	0.0693503	14980.3	8003.5	20551.7	7810.27	0.556	4342.51	3467.76	17904	40115	27765	59577	26549	28985	34015	21488	48004	60164	38012	27413	53849	28323	28502	42158	41479	44856	54711	105061	136706	3082048	128501	460405	277179	306981	104732	73279	266215	64900
Jiangsu	10	2010	5.8668	0.130781	0.896319	1260	0.300724	14649.8	1.26925	0.032	0.015757	0.0723869	17494.1	9118.2	22944.3	7869.34	0.6058	4767.25	3102.09	20736	41573	32209	66131	29679	31451	38584	24029	58902	71115	43305	29776	60437	30940	34349	49340	46337	48360	58861	99310	125681	3.35465e+06	129007	523463	290309	312346	106410	86533	269023	73098
Jiangsu	10	2011	6.9122	0.118657	0.893839	1520	0.542437	14838.9	1.36441	0.032	0.015952	0.0754468	20421.6	10805	26340.7	7898.8	0.619	4889.36	3009.44	23319	47936	37720	74137	33549	37256	44266	27236	72919	86520	48591	33643	70982	35896	41160	54499	53117	52576	64229	93509	128508	3536940	132141	651904	320915	313515	117271	99224	289413	79312
Jiangsu	10	2012	7.1653	0.117045	0.894432	1640	0.602868	15021.2	1.43825	0.031	0.019318	0.0804362	23211.2	12202	29677	7919.98	0.63	4989.59	2930.39	26300	50963	42641	80246	37619	40887	49167	30586	80340	92156	53489	38421	76548	40233	45981	59912	61735	58582	70908	86041	128306	3596736	128678	695026	334759	306102	119385	107862	293585	82260
Jiangsu	10	2013	7.2166	0.141677	0.895318	1640	0.625494	15213.8	1.54617	0.03	0.0165	0.0876656	25740.4	13597.8	32538	7939.49	0.6411	5090.01	2849.48	29334	58932	53980	96912	49693	52495	56782	31574	94616	105289	56357	48648	77708	44635	45774	66056	68571	63059	73532	66017	136190	5554442	181362	4205275	613948	484064	191980	304579	307892	211881
Jiangsu	10	2014	7.0094	0.131435	0.895536	1630	0.633136	15352.9	1.67912	0.03	0.016834	0.0933471	27601.2	14958.4	34346.3	7960.06	0.6521	5190.76	2769.3	32347	60621	58409	104454	51856	56749	61473	34786	102341	111934	61740	52353	81571	49111	49159	70130	73779	71787	76028	63023	117656	6123192	181179	4501977	593568	497774	197569	290372	333209	221396
Jiangsu	10	2015	7.1779	0.061972	0.900397	1760	0.641764	15478.1	1.80698	0.03	0.017176	0.097546	30170.6	16256.7	37173.5	7976.3	0.6652	5305.83	2670.47	33957	60418	62731	113893	55598	63185	66981	42391	117249	119198	66686	54677	91213	54062	54116	78115	81693	77468	82372	58330	106039	5951956	173926	4173319	586032	492318	173429	282597	350513	226451
Jiangsu	10	2016	6.8403	0.09429	0.896931	2000	0.649694	15331.8	1.90023	0.03	0.017627	0.0999475	32873.8	17605.6	40151.6	7999	0.6772	5416.92	2582.08	37953	62330	66994	116629	58172	67127	71773	45013	130501	122648	72680	60258	100375	60723	57905	88282	92202	84242	96402	56166	85487	5674230	145111	3967734	561091	496425	168972	273185	380797	222448
Jiangsu	10	2017	6.7137	0.16764	0.902824	2240	0.669137	15445.9	1.98992	0.03	0.017685	0.100382	35979.3	19158	43621.8	8029.3	0.6876	5520.95	2508.35	39463	74833	72235	123450	62668	72843	77476	47395	143002	126541	75084	62893	112285	66997	63066	101430	104414	91968	111840	50713	73175	5432118	147947	4.06977e+06	538513	481339	165628	279156	403481	230320
Jiangsu	10	2018	6.646	0.170036	0.91185	2240	0.68948	15588.4	2.06085	0.03	0.020743	0.0974714	39190.7	20845.1	47200	8051	0.6961	5604.3	2446.7	43470	88012	79022	136619	64663	81009	86323	49527	144766	136975	81329	61768	123839	70150	66169	113637	116589	107119	126578	38572	64954	4975454	141915	4340438	555806	460396	180358	320043	394001	253675
Jiangsu	10	2019	6.5838	0.161471	0.911057	1980	0.713048	15588.4	2.15535	0.03	0.020694	0.0945444	42715	22675.4	51056.1	8070	0.7061	5698.23	2371.77	51095	94090	86366	142745	69783	88790	98468	51977	147409	162687	83674	71335	128141	78242	64189	124443	128624	108370	140128	27116	40259	4537372	142893	2700651	604790	483382	191693	324252	388932	290991
Zhejiang	11	2003	4.008	0.315708	0.732093	474	0.164958	4528.73	0.897179	0.042	0.013177	0.0619499	9532.39	5389	13179.5	4857	0.531852	2583.21	2273.79	16367	13994	14267	34733	15982	20288	22718	13516	44263	31578	22692	20137	28627	18908	19269	25677	29366	27060	29785	26974	17159	1114933	90239	518550	206594	197247	88419	48027	183401	50269
Zhejiang	11	2004	3.7637	0.312945	0.749334	650	0.180305	4601.47	0.906676	0.041	0.013807	0.0619361	11370.6	5944.06	15881.6	4925	0.546063	2689.36	2235.64	20916	15646	14722	41370	16915	22968	26191	14788	47690	41996	24985	21403	33258	21657	22074	31835	35360	33878	36543	24374	16719	1.5425e+06	94688	696200	197308	194399	91746	49173	186856	55479
Zhejiang	11	2005	4.9357	0.255169	0.768771	621	0.192807	4764.71	0.961713	0.037	0.013424	0.063205	12056.9	6660	16293.8	4991	0.5602	2795.96	2195.04	24041	18756	16446	46311	18837	26150	29218	15973	54870	50972	29200	22939	37031	24368	23834	36644	39757	37564	44413	18331	18101	2033937	100658	825433	192372	193389	98288	49316	191036	61736
Zhejiang	11	2006	5.1099	0.24837	0.804453	670	0.20761	9344.12	1.03929	0.035	0.013407	0.0655707	13510.4	7334.8	18265.1	5072	0.565	2865.68	2206.32	24760	21318	18507	62318	20415	27070	31652	17331	52141	53667	29144	23308	39682	24377	24288	38638	41483	39896	45876	16778	16816	2455019	109788	1012690	202938	198409	107838	63304	202510	70038
Zhejiang	11	2007	5.3781	0.231023	0.835322	757	0.226402	9785.49	1.05695	0.033	0.014937	0.0681219	15305.7	8265.2	20573.8	5155	0.572	2948.66	2206.34	28182	23066	20970	59108	22791	29730	36138	19962	59844	65882	32540	27306	44602	27383	30225	44495	46595	44028	51925	15801	14963	2847324	110273	1057705	210014	205085	114090	72385	224000	83160
Zhejiang	11	2008	5.4421	0.1922	0.856228	883	0.266096	10162	1.06015	0.035	0.014772	0.0707479	17015.9	9257.9	22726.7	5212.4	0.576	3002.34	2210.06	30338	26469	23816	64424	25056	33442	39596	21301	64703	77773	37291	28778	50491	28861	30798	48815	50830	47433	55527	15751	15876	3192328	121723	1217263	246828	220742	143125	88726	254760	93059
Zhejiang	11	2009	5.7393	0.267099	0.854302	1190	0.289527	10484.5	1.0734	0.033	0.014785	0.0707423	18462.7	10007.3	24610.8	5275.5	0.579	3054.51	2220.99	32969	26292	25429	68464	26580	35705	43041	22456	71664	84714	39558	29627	53648	30583	29586	58993	56499	49956	59339	14865	16593	3330811	124685	1558483	280892	239385	149333	100300	279838	103919
Zhejiang	11	2010	6.1409	0.273077	0.863566	1340	0.365922	10801.7	1.16104	0.032	0.014688	0.0708298	21196.6	11302.6	27359	5446.51	0.6162	3356.14	2090.37	34088	28330	29671	77180	28595	39901	48359	24679	77125	98135	42290	32450	56621	32462	35127	63693	62508	56313	64667	14444	17399	3.51699e+06	125864	1801993	310371	252133	156029	111581	294164	136451
Zhejiang	11	2011	6.9111	0.249417	0.882722	1670	0.500146	10958.4	1.19492	0.031	0.019037	0.0704771	24222.4	13070.7	30970.7	5463	0.623	3403.45	2059.55	37570	35070	35363	82886	31590	45488	54242	29056	83493	112458	48153	39205	64799	36731	39230	66361	70101	61695	69421	14911	15575	3767476	138782	2367182	378794	274113	181447	125558	318802	152819
Zhejiang	11	2012	7.0553	0.158936	0.881095	1790	0.641884	11132.4	1.23511	0.03	0.019171	0.0736536	27190.9	14551.9	34550.3	5477	0.632	3461.46	2015.54	41718	45015	40464	85668	36901	50256	57737	32827	96741	117291	52212	47391	67761	41192	42613	70174	78385	66915	73676	8183	13956	3724790	132999	2940726	392572	293640	163226	140702	363777	174563
Zhejiang	11	2013	6.7353	0.209577	0.893869	1800	0.678647	11316.3	1.24841	0.0301	0.01928	0.0773833	30022.8	16106	37851	5498	0.64	3518.72	1979.28	47000	46043	45895	93793	43251	54908	64156	35829	106946	124711	56607	52596	82352	46195	44727	74700	86220	73090	80118	7534	9722	3.57949e+06	135425	3032323	401941	313698	147032	153530	363239	179474
Zhejiang	11	2014	6.4821	0.189618	0.899648	1800	0.706264	11408.5	1.25943	0.0296	0.019608	0.0829449	33008.6	19373.3	40392.7	5508	0.6487	3573.04	1934.96	50469	49626	51295	103547	46149	60533	70156	40210	114908	130337	61529	57268	90368	50161	46508	80038	95067	78311	85414	5613	8562	3505533	134227	3294524	417255	326864	138387	164351	379631	197468
Zhejiang	11	2015	7.2986	0.106767	0.903233	1990	0.684275	11570.1	1.26303	0.029	0.019498	0.0858321	35988.9	21125	43714.5	5539	0.658	3644.66	1894.34	53661	49149	55370	107952	48279	64327	75002	42540	126266	130734	66336	63241	98452	55026	48471	90882	104369	87177	93306	4743	6999	3305956	109841	3.23417e+06	421016	319560	134950	170607	423045	200523
Zhejiang	11	2016	6.94	0.154356	0.919289	1790	0.66907	11671.9	1.26145	0.0287	0.01932	0.0887873	39194.7	22866.1	47237.2	5590	0.67	3745.3	1844.7	61992	48428	60390	122323	50350	71347	83408	45713	145657	130813	71088	65365	99537	61104	58157	102888	117116	97257	108789	4262	6039	3159131	119614	3101168	376337	315270	134500	186104	463846	208787
Zhejiang	11	2017	6.8639	0.265935	0.920635	1940	0.691727	11774.6	1.15731	0.0273	0.019091	0.0900081	42843.1	24955.8	51260.7	5657	0.68	3846.76	1810.24	65914	57590	65173	127722	51879	77636	87811	47339	165532	132411	74546	69885	120521	66032	63285	114415	131742	109932	124495	4633	4707	3150247	123410	2883413	382562	317777	140195	230198	484530	216161
Zhejiang	11	2018	6.9703	0.313686	0.943777	2270	0.711382	11829.6	1.14282	0.026	0.018999	0.0914739	46781.7	27302.4	55574.3	5737	0.689	3952.79	1784.21	69217	72427	73055	135779	56265	87315	94562	51433	190839	142951	77868	73894	142811	73390	68146	123681	143804	114343	136641	4325	4194	2893362	122063	2799243	368224	301129	137956	218467	449714	224209
Zhejiang	11	2019	7.2304	0.208828	0.9	1680	0.723282	11942.5	1.10906	0.025	0.018632	0.0917482	51090.4	29875.8	60182.3	5850	0.7	4095	1755	79112	87460	80483	129352	61899	94838	96986	54896	223499	151017	84757	79585	154576	82758	69723	127038	154261	116297	148439	5171	4490	2867839	110641	2123613	396667	312307	145986	243579	475622	267975
Anhui	12	2003	1.6446	0.245978	0.629766	454	0.074152	4979.24	0.85051	0.041	0.011845	0.0455362	3632.83	2127.5	6778	6163	0.323692	1994.91	4168.09	5872	12699	9701	13563	8531	6163	9473	7302	19158	14475	11128	8483	13348	9328	7600	11436	11845	11167	12915	121655	295648	794706	86848	291515	226637	171202	35855	27363	118977	24893
Anhui	12	2004	1.5497	0.243039	0.656048	546	0.074486	5138.37	0.919418	0.042	0.013166	0.0434641	4362.8	2499.33	7993.55	6228	0.33917	2112.35	4115.65	6706	18680	11595	15647	9625	7748	11445	9001	20342	16636	11609	8465	15874	11093	11246	13597	13546	14058	15065	106024	304244	709124	90998	268545	199512	170641	33978	29427	118593	31173
Anhui	12	2005	2.0453	0.26356	0.688792	654	0.077092	5211.67	1.00923	0.044	0.013235	0.0437226	4710.54	2641	8470.7	6120	0.355	2172.6	3947.4	7812	24473	13651	18269	11425	9889	12999	10159	23751	20099	13964	14877	18432	12310	13981	15317	15608	14978	17020	94027	284654	683153	93056	276957	174750	161033	26654	31926	112238	31896
Anhui	12	2006	2.375	0.198361	0.708956	867	0.081051	10566.3	1.10325	0.042	0.013584	0.0431447	5492.64	2969.1	9771.1	6110	0.371	2266.81	3843.19	8685	29537	15736	21491	14245	11318	15065	11344	23113	22642	16990	15453	20970	12559	14919	17375	17301	17807	18282	81314	298571	690034	95552	313248	152332	150773	26437	36128	115846	30839
Anhui	12	2007	2.6027	0.242971	0.736951	1180	0.086682	10620.8	1.20923	0.041	0.014547	0.0440453	6620.3	3556.3	11473.6	6118	0.387	2367.67	3750.33	10857	36059	18937	26457	17760	13913	17768	12990	27068	27193	19046	16695	23848	15175	17463	22635	21491	20900	23453	81418	288320	703270	95278	327121	151027	152067	30849	35065	120098	30237
Anhui	12	2008	2.8488	0.228374	0.767602	1480	0.094281	10653.3	1.31687	0.039	0.015159	0.047299	7761.6	4202.5	12990.4	6135	0.405	2484.68	3650.32	12473	43838	22509	31002	20539	16965	22247	14321	28550	32652	22145	20884	28850	16771	20156	25400	25104	22793	28675	74597	292540	673032	98228	342104	137617	147974	30971	34686	130866	33345
Anhui	12	2009	3.2355	0.214292	0.764046	1960	0.102463	10678.9	1.43922	0.039	0.015495	0.0489135	8538.07	4504.3	14085.7	6131	0.421	2581.15	3549.85	13437	48404	24960	35680	24075	23112	25098	16857	31275	36891	23285	26130	32019	18423	19180	28230	27640	24416	30574	62454	303042	706086	94288	406961	134576	147374	37369	37374	145353	43543
Anhui	12	2010	3.741	0.234607	0.770005	2350	0.171051	10693.1	1.59358	0.037	0.016788	0.0524295	9802.54	5285.2	15788.2	5956.7	0.4301	2561.98	3394.72	16945	57314	29238	40467	28046	26935	29408	18188	36316	46561	27250	28122	36068	20949	23258	32445	31811	28435	33622	61393	321148	760144	95966	421286	139711	151386	36886	38045	146894	48812
Anhui	12	2011	4.5007	0.291688	0.771396	3020	0.487131	10704	1.71719	0.037	0.017426	0.0544037	11775.7	6232.2	18606.1	5968	0.448	2673.66	3294.34	19443	65805	36355	47113	35319	30234	36103	22511	41378	52780	32958	37525	43177	25330	27929	37721	38420	34353	37899	59674	340343	855255	97528	584263	155140	167013	39370	43665	160433	61461
Anhui	12	2012	4.9884	0.209099	0.787117	3510	0.690431	11822.3	1.84256	0.037	0.019706	0.0555279	13607.1	7160.5	21024.2	5988	0.465	2784.42	3203.58	22845	70568	42393	55599	39920	34988	42787	26406	47492	59416	39354	36804	51618	29700	35602	42258	44178	39138	43086	53814	346114	909353	98776	699418	159247	163223	43362	45481	168299	69098
Anhui	12	2013	4.9851	0.23618	0.826619	3650	0.683273	12438.3	1.95296	0.034	0.017579	0.0588337	15284.7	8097.9	23114.2	6029.8	0.4786	2885.86	3143.94	24302	70893	43980	72363	44710	39255	47235	28563	53755	65920	46737	41054	60816	32453	37074	46183	50908	42787	46164	49105	331031	1204329	119807	996751	225593	220051	57923	62069	172355	93760
Anhui	12	2014	4.7799	0.242713	0.832159	3780	0.684936	12482	2.05803	0.032	0.019399	0.0626304	17250.6	9916.4	24838.5	6082.9	0.4915	2989.75	3093.15	27185	69636	48259	77120	47632	41863	50271	29652	62501	72215	50362	40853	63084	35989	38091	48487	54468	44211	49012	45149	313318	1226224	108415	970835	234400	217155	59848	73792	176627	103962
Anhui	12	2015	4.805	0.163389	0.842272	4070	0.692444	13381.5	2.16403	0.031	0.017579	0.0672286	18958.8	10820.7	26935.8	6143.6	0.505	3102.52	3041.08	31084	61900	50945	81692	48895	45751	56659	33629	67922	77300	54252	47458	69129	40802	41690	59088	63695	52272	57083	43724	270442	1209481	103486	926497	236454	222641	59516	76545	191154	104170
Anhui	12	2016	4.6095	0.19812	0.845348	4200	0.697886	14143.7	2.3088	0.032	0.017592	0.0698584	20785.2	11720.5	29156	6196	0.5199	3221.3	2974.7	34264	57981	54614	89223	51399	49999	61038	34897	72390	76724	60543	47667	73035	46332	44353	64322	71104	55773	63744	42426	230563	1223624	104472	917769	231913	229305	59484	80122	222630	104582
Anhui	12	2017	4.759	0.341776	0.857018	4640	0.720448	14551.5	2.17001	0.029	0.017426	0.0718893	22858.2	12758.2	31640.3	6255	0.5349	3345.8	2909.2	36132	73210	59089	98235	52814	53081	65444	36966	77304	79039	61085	51665	83571	53681	48500	72792	83435	62014	74487	37994	202600	1197691	101956	932566	227220	242102	54129	81924	236855	111925
Anhui	12	2018	4.5578	0.305403	0.860175	4900	0.732053	15626	2.28373	0.028	0.017394	0.0731309	25151.2	13996	34393.1	6324	0.5469	3458.6	2865.4	41274	90747	66006	104472	60785	59766	72012	40071	84256	84882	68033	56024	93035	62816	45070	98697	96596	68973	87207	31171	190349	1395231	102702	1393958	230068	245180	63520	93312	240999	146706
Anhui	12	2019	4.6817	0.297882	0.874179	4560	0.741246	15626	2.36411	0.026	0.017594	0.0738648	27763.4	15416	37540	6365.9	0.5581	3552.81	2813.09	46917	101890	70475	113122	63074	62075	80896	45613	91580	89847	68129	62201	95977	50926	49472	97702	105423	72342	93753	31548	142775	1276915	104110	1110593	269985	237028	57873	92564	232291	176204
Fujian	13	2003	2.6185	0.22361	0.640129	400	0.103998	4523.99	0.506536	0.041	0.013992	0.0623314	6636.91	3733.9	9999.5	3502	0.463326	1622.57	1879.43	7781	10858	12217	20562	13779	13375	18181	10333	33158	26245	16582	14538	19913	12948	15009	15029	16589	16919	16567	77502	35773	1538910	80725	264008	123842	141942	41632	36745	94607	35472
Fujian	13	2004	2.4742	0.236657	0.668823	510	0.107124	4633.8	0.53319	0.04	0.015018	0.0608245	7932.19	4089.38	12117.9	3529	0.478643	1689.13	1839.87	8860	13577	13300	22842	14381	15094	20424	11455	37500	29948	17542	16393	21783	14067	15952	16698	19071	18719	18617	74943	39592	1.83231e+06	82334	272602	114261	150635	47365	36195	95640	43764
Fujian	13	2005	3.0348	0.271049	0.707087	506	0.115166	4805.11	0.533464	0.04	0.018555	0.0618812	8173.34	4450.4	12321.3	3557	0.473	1682.46	1874.54	9828	16664	14229	26695	16161	16491	22623	12570	40326	34993	18944	16986	24346	16433	15707	19111	21733	21018	21616	75103	42159	2001744	80793	305938	110468	149953	48557	34741	98821	51117
Fujian	13	2006	3.2938	0.318746	0.735342	642	0.127225	7136.03	0.553589	0.0393	0.018689	0.0635482	9115.68	4834.8	13753.3	3585	0.48	1720.8	1864.2	10717	18055	16297	29453	19494	18535	25189	14432	39147	37393	21860	19931	27159	17476	17669	21771	23374	24453	24308	69957	44536	2177208	81930	362624	114883	151496	48568	41457	99472	59513
Fujian	13	2007	3.5742	0.333274	0.762395	803	0.141982	7166.2	0.573678	0.039	0.020487	0.0671589	10355.8	5467.1	15505.4	3612	0.487	1759.04	1852.96	12500	20637	18391	35946	21205	22044	29451	16118	42125	46441	24695	20811	34677	21719	19565	26158	28331	27670	28503	69756	45884	2277162	80205	443282	118649	147863	56170	41386	99922	69181
Fujian	13	2008	3.7157	0.243186	0.777105	989	0.153127	7304.78	0.609937	0.0386	0.022808	0.0701536	12067	6196.1	17961.5	3639	0.499	1815.86	1823.14	14496	23797	20678	39701	24251	24676	32801	17501	46338	56965	30428	23244	36583	22680	22648	31361	32893	29704	34144	66667	48231	2237690	94560	450131	123383	159167	56266	38575	109572	72352
Fujian	13	2009	4.0628	0.309565	0.788389	1390	0.15982	7378.73	0.659491	0.039	0.023459	0.072784	13309.1	6680.2	19576.8	3666	0.514	1884.32	1781.68	15790	26014	22631	42466	26029	27927	35263	18681	52776	61181	31581	22736	37348	24092	27430	36952	36226	31419	39727	68444	51007	2264122	96043	519644	131197	161943	61131	40923	121587	87748
Fujian	13	2010	4.5809	0.35	0.796531	1620	0.24625	7503.3	0.761221	0.038	0.022746	0.0737542	15623.3	7426.9	21781.3	3693	0.571	2108.7	1584.3	18041	29328	26627	50529	30138	32850	39741	22268	59117	70532	36917	24511	41592	26824	33977	40550	40844	35654	42000	66839	47920	2412046	92339	624024	138617	166591	75834	46460	129221	90291
Fujian	13	2011	5.616	0.274319	0.829985	2200	0.399086	7611.05	0.802602	0.0369	0.022849	0.0738196	18149.4	8778.6	24907.4	3720	0.581	2161.32	1558.68	22021	33539	33341	57728	36770	37998	45761	26577	59763	84296	43969	32928	49201	31336	35808	46832	50672	41715	47138	60972	69121	2.82984e+06	95320	999451	201270	178677	87380	54282	135976	91057
Fujian	13	2012	6.1858	0.152788	0.840894	2370	0.587647	7803.87	0.849826	0.0363	0.022946	0.0753787	20747.6	9967.2	28055.2	3748	0.596	2233.81	1514.19	24516	36341	38725	66938	42743	44404	52750	30883	67917	94708	50397	38431	55947	35842	34320	52282	57525	47017	53850	48172	53174	2.92378e+06	94754	1216984	242500	186432	94038	53301	147544	101843
Fujian	13	2013	6.3388	0.200693	0.851003	2490	0.604134	8205.69	0.903049	0.0355	0.023052	0.0785651	23114.7	11184.2	30816.4	3774	0.6077	2293.46	1480.54	26205	38110	42820	71123	44202	45998	55821	33572	74101	101550	52646	49942	63208	37278	38689	56378	64544	53391	57022	45443	27679	2525538	88735	1461936	263668	243483	98117	69597	151274	126067
Fujian	13	2014	6.2012	0.167725	0.858321	2570	0.609905	8342.13	0.941198	0.0347	0.023121	0.0809458	23818.8	12650.2	30722.4	3806	0.618	2352.11	1453.89	28340	43793	46892	77293	50028	51458	61115	36200	78734	107826	57980	49695	64519	43231	44215	59844	72183	57796	60411	45228	25258	2452890	90840	1547528	269955	240407	99258	70972	164797	143210
Fujian	13	2015	6.4145	0.161523	0.874712	2870	0.615811	8622.01	0.963932	0.037	0.022923	0.0805732	25988.8	13792.7	33275.3	3839	0.626	2403.21	1435.79	32510	44100	50675	80987	50819	54866	65314	39599	84288	108537	62253	51927	76956	46144	46396	69226	80314	61039	68728	44826	25034	2354738	90304	1629349	283603	245012	97973	89967	178754	152905
Fujian	13	2016	6.1242	0.184634	0.875749	3100	0.6373	8801.07	0.899913	0.0386	0.022716	0.0794454	28364.8	14999.2	36014.3	3874	0.636	2463.86	1410.14	35577	44222	54439	88471	53557	57937	71181	39434	93774	108377	65110	56934	79317	51083	48040	75773	87997	67018	76926	43384	20674	2282819	90596	1685408	278203	234009	97672	91104	195733	156043
Fujian	13	2017	6.1851	0.212695	0.875155	3320	0.643263	8904.53	0.894912	0.0387	0.022756	0.0796107	31022.8	16334.8	39001.4	3911	0.648	2534.33	1376.67	40543	48460	59131	93073	56160	61504	77536	41429	98427	109757	69166	62848	91712	59204	49646	84471	96333	73532	89047	42353	19870	2131199	87224	1767182	287293	239153	99713	108489	208204	156379
Fujian	13	2018	5.7262	0.279184	0.893753	3550	0.659706	8977.82	0.911855	0.0371	0.022583	0.0806815	33815.5	17821.2	42121.3	3941	0.6582	2593.97	1347.03	43564	56078	64881	110659	61394	69863	86529	44828	107642	116574	74039	61426	103976	60379	59381	94333	110082	82559	100608	35783	13254	2136479	115061	1970155	295491	230380	110633	122669	200338	171106
Fujian	13	2019	5.495	0.20335	0.9	3020	0.677448	9050.7	0.929934	0.035	0.022653	0.0812608	36893	19568.4	45620.5	3973	0.665	2642.05	1330.95	51430	61314	71641	119694	64846	82363	90085	46387	124370	116732	81052	62639	118649	62162	66063	96557	119961	84160	106176	14847	13991	1707936	113779	1636852	247294	228697	91868	107821	251568	173543
Jiangxi	14	2003	2.1515	0.197404	0.627251	517	0.083674	3666.65	0.429258	0.036	0.012694	0.0540844	3929.98	2457.5	6901.4	4254	0.331349	1409.56	2844.44	5492	9421	9626	12707	9220	7782	14011	8313	16831	15390	9873	10783	12804	8736	8152	10986	12614	11888	11484	165955	98465	607054	93414	181401	136572	162946	21521	24903	86346	19919
Jiangxi	14	2004	2.0344	0.182463	0.655044	677	0.086788	3704.19	0.526455	0.036	0.015406	0.0545629	4570.44	2786.78	7876.7	4284	0.350429	1501.24	2782.76	6238	10987	10817	14270	10150	9319	15576	9077	18737	18289	10196	11073	14792	9678	9239	12213	13924	12544	12873	160759	88436	626956	93230	205436	113667	165672	21556	27213	89369	24126
Jiangxi	14	2005	2.7242	0.205953	0.672508	789	0.08987	3730.54	0.655761	0.035	0.015542	0.0548337	5160.5	3128.9	8619.7	4311	0.37	1595.07	2715.93	7151	13618	11921	17274	11152	10560	17885	9713	21025	21333	12733	11834	16738	11053	9460	14881	16451	15517	14561	148188	88268	640240	94797	223987	101967	160792	23849	29327	86838	23926
Jiangxi	14	2006	2.9404	0.146466	0.688772	991	0.06991	7678.8	0.80318	0.036	0.015211	0.0558144	5815.73	3459.5	9551.1	4339	0.3868	1678.33	2660.67	8208	15882	13661	19766	12615	12336	20568	10861	20428	22921	13918	13324	20372	12319	11569	16027	18242	19117	16025	147773	95556	679790	94713	219836	101351	160288	24807	31031	88245	26573
Jiangxi	14	2007	3.2309	0.119556	0.704782	1300	0.081623	7825.81	0.95302	0.034	0.01511	0.0579866	6992.69	4044.7	11451.7	4368	0.398	1738.46	2629.54	9670	17033	15423	24444	15079	14277	23650	12862	26967	26513	17365	15534	22705	14655	13149	19537	22757	21796	19550	147707	89227	702638	95174	253563	88751	163159	18808	30658	85343	24810
Jiangxi	14	2008	3.477	0.154371	0.726757	1700	0.125065	8014.79	1.14176	0.034	0.018636	0.0596411	8075.98	4697.2	12866.4	4400.1	0.4136	1819.88	2580.22	12478	20503	17573	27453	16584	18128	27684	13829	25242	29324	18285	15726	25533	15739	17444	22433	24982	23794	22047	137350	100909	701868	87328	252495	88640	163269	19046	29312	89035	20766
Jiangxi	14	2009	3.907	0.100334	0.721842	2190	0.13129	8204.25	1.33381	0.034	0.019178	0.0615118	8938.1	5075	14021.5	4432.16	0.4318	1913.81	2518.35	15049	24589	21508	30908	20518	20868	31921	15840	26118	33055	21531	16691	28934	16965	20053	26175	25165	27576	25824	126940	84838	680148	95753	274292	83340	156240	18004	36140	99777	20257
Jiangxi	14	2010	4.4382	0.107313	0.732363	2470	0.197188	8418.98	1.52433	0.033	0.019049	0.0633544	10059.1	5788.6	15481.1	4462.25	0.4406	1966.07	2496.18	16265	27978	25579	37312	25293	24868	38628	18268	32566	38926	25857	21725	30430	19757	22375	29980	31494	30555	29395	120860	89831	715888	94785	294090	78752	152611	16188	33218	105030	21075
Jiangxi	14	2011	5.4549	0.144436	0.740803	3340	0.451359	8780.36	1.72327	0.03	0.01916	0.0607316	11737.3	6891.6	17494.9	4488.44	0.457	2051.22	2437.22	19765	36496	31158	43449	29175	29148	46120	21290	37676	47112	33475	32529	37628	21789	29392	34940	37542	32519	34013	108456	89664	877764	102643	495304	130583	139630	33249	32151	108882	36015
Jiangxi	14	2012	5.9724	0.090672	0.743602	3770	0.542837	9017.67	1.94563	0.03	0.019538	0.0576523	13545.3	7829.4	19860.4	4503.93	0.4751	2139.82	2364.11	20580	39041	39023	46839	34105	32595	51912	22926	44438	53798	38431	37231	39356	28339	27611	41596	38962	43512	39622	116386	101209	1020243	105199	666329	166946	128752	42521	43445	106257	44548
Jiangxi	14	2013	6.2008	0.122994	0.783312	3760	0.558717	9105.81	0.871041	0.032	0.020344	0.0567592	15179.2	8781.5	21872.7	4522.15	0.4887	2209.97	2312.18	26459	41762	39351	51676	38753	39111	54417	26772	57867	70497	37376	37835	47738	40756	31840	45499	48823	44087	40732	55802	83298	1258497	131941	913309	155961	212442	46930	63475	112662	54294
Jiangxi	14	2014	6.0165	0.099902	0.791467	3960	0.568452	9312.28	0.936894	0.033	0.020915	0.0565903	17244.1	10116.6	24309.2	4542.16	0.5022	2281.07	2261.09	26877	42984	42976	56550	42002	42827	58120	30722	56721	71160	45093	40161	55957	41782	42678	48543	53384	44941	46893	51562	77688	1335144	142956	944074	176041	207779	40841	71548	121773	57252
Jiangxi	14	2015	6.0389	0.063755	0.795618	4380	0.581081	9378.74	1.02353	0.034	0.021246	0.0572106	19068.4	11139.1	26500.1	4565.63	0.5162	2356.78	2208.85	32076	41120	46020	62064	46146	45992	62546	33402	60353	76035	49714	41535	66749	37900	44908	55995	61728	53649	54577	49010	72117	1382370	141223	919151	181054	211666	44210	67028	125759	63593
Jiangxi	14	2016	5.7831	0.053329	0.815286	4570	0.610061	9695.15	1.02245	0.034	0.021341	0.0581521	20918.1	12137.7	28673.3	4592	0.531	2438.35	2153.65	35473	42902	49564	62157	50108	47104	66594	35880	71535	83974	53632	45854	74844	42849	51631	63924	70701	61272	64568	44573	57787	1.41754e+06	93092	903979	173184	202987	42621	55967	130064	67068
Jiangxi	14	2017	5.7922	0.076644	0.826047	4980	0.62209	9717.67	1.10084	0.033	0.021636	0.0576301	23045.9	13241.8	31198.1	4622	0.546	2523.61	2098.39	37769	49041	53417	70226	52990	50814	70558	37123	73333	84304	56954	49468	80120	46782	51848	70448	78366	64370	75324	42538	45907	1309710	92428	876903	178055	205494	42415	62728	132636	71111
Jiangxi	14	2018	5.7393	0.096504	0.936611	5380	0.631863	12522.8	1.16525	0.034	0.021945	0.0579293	25305.1	14459.9	33819.4	4648	0.5602	2603.81	2044.19	42158	55651	60717	77678	57340	57043	79238	41736	82800	91038	58792	56288	89931	47150	48994	76544	87882	72367	80900	37538	31404	1064654	90128	869585	151613	189897	33111	55363	143764	79940
Jiangxi	14	2019	5.8874	0.081452	0.862693	4930	0.639888	12522.8	1.24395	0.029	0.022074	0.0573061	27710.7	15796.3	36545.9	4666.13	0.5742	2679.29	1986.84	47217	60070	64009	85041	60087	62094	87032	44047	88865	95100	65562	61645	97846	43321	50235	80709	96226	80511	86107	21353	30402	1075153	94250	834108	159695	183204	35608	54661	202209	94151
Shandong	15	2003	2.2076	0.151199	0.718037	318	0.124487	4958.78	1.58197	0.036	0.009315	0.0541973	5368.19	3150.5	8399.9	9125	0.422466	3855	5270	8617	17802	10000	17681	10028	8006	16124	9249	24660	19924	14269	12805	17264	11685	11633	13342	15106	16325	13723	93708	607939	2720306	205455	387290	431156	307797	91790	58472	254284	52254
Shandong	15	2004	2.0895	0.152558	0.737759	403	0.132756	5056.44	1.69094	0.034	0.010566	0.0540866	6421	3507.43	10187.1	9180	0.436184	4004.17	5175.83	9812	21077	11376	19297	11751	9051	18777	10898	29349	23222	15818	13164	19724	12827	13238	15201	17043	18227	15418	88415	607422	2818189	209928	437354	389713	307018	87604	55829	250816	53482
Shandong	15	2005	2.7684	0.147806	0.785137	497	0.140834	5210.14	1.80855	0.033	0.011246	0.0549786	6996.93	3930.5	10744.8	9248	0.45	4161.6	5086.4	12748	24157	13019	22090	13069	11768	21488	12023	34609	28213	16214	15425	23235	15214	24511	18549	20608	21906	19347	65142	615758	3366946	202320	682219	397962	294570	117980	57984	246104	85452
Shandong	15	2006	3.0814	0.137661	0.801773	623	0.146955	13323.2	1.90432	0.033	0.011709	0.0579045	7975.12	4368.3	12192.2	9309	0.461	4291.45	5017.55	14519	27105	15633	25251	15400	13489	24826	13807	35191	28207	19225	17085	26764	15278	25080	21772	22690	24853	21150	57062	622056	3451372	198499	692063	361762	295376	112983	54302	248396	81513
Shandong	15	2007	3.2447	0.133521	0.811985	726	0.155557	13799.5	1.9884	0.032	0.01185	0.0613826	9323.42	4985.3	14264.7	9367	0.4675	4379.07	4987.93	16960	30805	18477	29553	18183	15813	27998	15069	38577	35303	22182	19661	31695	18347	27313	27289	26235	30657	25522	56007	603963	3463227	198712	710453	356633	309240	111555	53893	264288	86225
Shandong	15	2008	3.2582	0.113858	0.819447	892	0.16628	14349	2.09742	0.037	0.012105	0.0666754	10717.5	5641.4	16305.4	9417.23	0.476	4482.6	4934.63	19387	36133	21340	33497	20395	18254	31235	17646	37981	40297	24426	24085	36770	21114	31777	31032	30504	36088	29722	52225	620742	3401231	198750	657091	365769	307275	115263	57695	293492	84107
Shandong	15	2009	3.5053	0.083765	0.827031	1160	0.17539	14739.5	2.26408	0.034	0.013516	0.0715025	11768.5	6118.8	17811	9470.3	0.4832	4576.05	4894.25	21884	40564	23930	37911	23222	21272	34477	19568	44403	46480	27254	26130	40964	22995	29853	34391	33982	37964	32496	51682	630909	3372251	205132	704565	404239	332476	116516	62031	328027	93545
Shandong	15	2010	3.982	0.132775	0.83043	1360	0.280792	14945.3	2.41131	0.034	0.013872	0.073044	13429.2	6990.3	19945.8	9587.87	0.497	4765.17	4822.7	24143	46560	27773	42025	25807	23845	39435	21810	50315	53148	29793	28987	45803	25387	32461	38621	38044	41008	35726	50501	667808	3463537	203573	802723	382277	346895	110249	65508	332428	113859
Shandong	15	2011	4.5978	0.141922	0.834859	1760	0.572226	15161.8	2.5593	0.034	0.014423	0.0725138	15704.2	8342.1	22791.8	9637.27	0.5095	4910.19	4727.08	28329	53767	32069	45874	31101	28807	46016	25926	52186	61416	32966	35000	52518	28827	45264	41988	43101	43492	39284	47830	734199	3722442	208032	1219431	482089	356610	136045	83677	346174	133691
Shandong	15	2012	4.9794	0.099424	0.834452	1960	0.667474	15902.9	2.69582	0.033	0.014146	0.0700181	17997.2	9446.5	25755.2	9684.87	0.5243	5077.78	4607.09	31290	57906	36833	52617	33667	32868	50097	29528	60459	72345	38545	39480	53319	31602	45588	46176	47768	48702	42914	27503	788229	3.94977e+06	210364	1368363	489339	373826	152025	91302	327436	158165
Shandong	15	2013	5.0212	0.108131	0.850618	1750	0.69579	16436	2.83005	0.032	0.014383	0.0697994	20103.7	10619.9	28264.1	9733.39	0.5375	5231.7	4501.69	39617	62390	41202	58181	40118	39219	55174	37068	74249	80835	44393	46169	56233	37195	38233	51658	54919	56870	48062	17962	746032	4371586	238516	1886478	672577	506405	192581	175437	347552	236862
Shandong	15	2014	4.7504	0.094519	0.858544	2040	0.705874	16873.5	2.97471	0.033	0.014505	0.0710083	21420.8	11882.3	29221.9	9789.43	0.5501	5385.17	4404.26	40558	63722	45519	63726	44675	41884	60303	37615	77282	89331	49742	51488	63176	39488	40300	58138	60460	62056	53430	16527	711535	4257505	237192	1775076	628241	497497	155794	169694	388285	255766
Shandong	15	2015	4.8159	0.078872	0.865383	2230	0.712063	17129.2	3.15428	0.034	0.014522	0.0740358	23542.8	12930.4	31545.3	9847.16	0.5701	5613.87	4233.29	51003	61718	48519	70580	47881	44386	66189	39723	81249	90869	52575	56970	70959	42743	42675	73073	70385	71453	65158	16817	645096	4175431	234703	1636800	598943	483949	140370	174352	415604	260826
Shandong	15	2016	4.6603	0.076196	0.867797	2410	0.715291	17277	2.40366	0.035	0.014477	0.0778588	25792.3	13954.1	34012.1	9947	0.5902	5870.72	4076.28	56617	65309	52255	74333	52421	47572	70509	42496	84346	93405	57331	59852	78755	45799	44511	81165	78411	77462	74552	15625	573810	4032137	230937	1603341	570855	493858	142149	182471	454491	267530
Shandong	15	2017	4.5693	0.076217	0.8682	2600	0.718743	17593.6	2.57183	0.034	0.014492	0.0812431	28246.3	15117.5	36789.4	10005.8	0.6058	6061.53	3944.3	63564	72651	57339	88179	56011	51944	76723	44824	89063	94704	59816	62958	85976	48135	46560	87647	84745	81074	80835	13845	513391	3832194	260819	1.59947e+06	526874	476881	140614	188821	461369	260729
Shandong	15	2018	4.5268	0.124737	0.87227	3090	0.728038	18226.6	2.67462	0.034	0.014432	0.0840084	30522.8	16297	39549.4	10047	0.6118	6146.75	3900.25	65898	82014	63247	97873	59229	56654	79524	45968	98005	97896	65454	64289	93662	48950	47030	94149	88758	84445	85147	7136	402933	3.41863e+06	256284	1590959	498933	475862	123434	180143	464620	253243
Shandong	15	2019	4.4009	0.157637	0.882416	2480	0.737652	18226.6	2.75536	0.033	0.014498	0.0855006	32878.5	17775.5	42329.2	10070.2	0.6151	6194.19	3876.02	66884	96161	69354	107732	66282	63856	90940	48369	101077	95721	69520	72605	103794	46300	49649	98875	100037	87556	92833	12003	297468	2717305	279260	1504759	467200	446500	116374	173099	556364	259873
Henan	16	2003	1.3915	0.126443	0.232332	372	0.068196	4421.02	0.992892	0.031	0.007345	0.0458954	3528.27	2235.7	6926.1	9667	0.275579	2664.02	7002.98	6115	14339	9550	14570	9370	7169	12556	7917	19377	16595	11159	10321	14986	9942	9217	10774	11474	10818	11031	96324	487152	1599172	231431	617075	589237	329390	98017	53134	211082	45617
Henan	16	2004	1.3182	0.121554	0.294479	484	0.070876	4534.01	1.09139	0.034	0.008439	0.045037	4158.41	2553.15	8073.36	9717	0.290797	2825.67	6891.33	6841	17223	10794	18714	10321	8152	13959	9110	19021	17860	11324	11570	15967	10428	9323	12064	12529	12524	11815	90608	486222	1520735	219749	642232	532368	333419	94946	51231	211898	45908
Henan	16	2005	1.9439	0.133434	0.329859	640	0.076351	4760.84	1.2197	0.035	0.008849	0.0445884	4647.5	2870.6	8668	9380	0.3065	2874.97	6505.03	7833	21958	12666	19089	12450	9742	17290	10274	22227	21743	13464	13448	19690	11812	10644	14093	14259	13736	13653	95336	492319	1552407	216847	647974	481787	329044	109989	48391	209167	54584
Henan	16	2006	2.2095	0.118475	0.359567	799	0.081197	14152.8	1.31008	0.035	0.008944	0.0455898	5387.56	3261	9810.3	9392	0.3247	3049.58	6342.42	9405	26040	14853	21878	14282	11536	19399	11796	22995	24238	15451	15261	22524	13459	15159	17151	17094	17996	16135	88051	492862	1590850	219274	712438	460318	315045	106537	50569	207198	59262
Henan	16	2007	2.4886	0.100027	0.376779	1180	0.08597	14292	1.41865	0.034	0.008761	0.0460424	6470.2	3851.6	11477.1	9360	0.3434	3214.22	6145.78	11259	31168	17522	26230	16467	13703	22308	13684	26991	29878	18790	17119	25012	17306	15834	22767	21064	20401	21755	86895	504024	1571067	211526	777798	431061	309578	100403	45788	223224	69447
Henan	16	2008	2.5287	0.157411	0.424828	329	0.100601	14409.9	1.56328	0.034	0.008909	0.0495513	7616.52	4454.2	13231.1	9429	0.3603	3397.27	6031.73	13455	37649	20993	31321	19388	16945	26387	16460	27391	34618	21928	21418	28998	20365	16818	26512	25438	23075	25446	79420	503340	1536464	204282	806406	410099	294190	90713	39947	214906	69193
Henan	16	2009	2.8486	0.13706	0.514401	1790	0.107419	14509.8	1.66111	0.035	0.009381	0.0521372	8412.85	4807	14371.6	9487.05	0.377	3576.62	5910.43	15718	41029	23330	33310	21354	19509	28392	18390	32510	38019	26125	21383	33250	22265	21542	29747	28008	25973	26751	69663	533243	1547755	206703	873204	388816	287767	95304	52037	220203	85703
Henan	16	2010	3.1587	0.163286	0.525217	2130	0.243592	14676	1.76267	0.034	0.011376	0.0542777	9530.24	5523.7	15930.3	9405.47	0.385	3621.11	5784.36	17433	46887	25864	37196	24151	22403	31748	20201	35042	41871	28913	24560	36436	24648	23650	33090	31177	28511	28474	71223	526480	1588235	210900	936620	381887	291456	99471	48658	225973	89734
Henan	16	2011	3.7358	0.096901	0.560054	2660	0.476586	14825.6	1.88474	0.034	0.012462	0.0550396	11306.4	6604	18194.8	9388.24	0.4057	3808.81	5579.43	20492	52619	30012	40672	28170	26913	37067	24604	38208	47749	34062	28474	39277	27486	25338	36082	35216	31249	30691	72511	636690	1938204	214574	1160597	427339	302415	105343	58671	238102	116381
Henan	16	2012	4.012	0.096024	0.579937	2980	0.636846	14949	2.00784	0.031	0.012758	0.0557026	13005.9	7524.9	20442.6	9406.2	0.4243	3991.05	5415.15	24226	55425	33803	44667	31682	31177	43478	27252	44518	57364	36852	30992	45988	29856	29170	39582	38814	35925	33696	58276	630007	2182526	224991	1255783	425923	308906	101005	63358	233242	131032
Henan	16	2013	4.1137	0.098004	0.634383	3190	0.653009	14959.9	2.10762	0.031	0.013491	0.0571262	14573.4	8475.3	22398	9413.35	0.438	4123.05	5290.3	25268	51158	33951	53634	33856	33759	44633	27895	47671	62835	37594	34965	47717	31679	27878	42099	43526	36555	36348	51860	625749	3126681	245582	1894751	526618	436185	118169	94622	241291	157641
Henan	16	2014	4.038	0.078682	0.667369	3390	0.665049	14961.5	2.21949	0.03	0.013671	0.0584339	16161.2	9966.1	23672.1	9436	0.452	4265.07	5170.93	28849	51239	37944	61076	38425	36690	49426	31010	52779	69223	41847	38679	53509	35771	30482	46419	49301	42426	38824	50902	563443	3371025	255263	1.89609e+06	532606	444852	112450	97236	239776	183979
Henan	16	2015	4.1	0.061666	0.694421	3690	0.671297	15005	2.32406	0.03	0.013608	0.0669549	17750.5	10852.9	25575.6	9480	0.4685	4441.38	5038.62	34941	48777	41338	65713	41283	39990	52099	33854	60671	74441	45429	41060	56866	37552	33857	50152	53308	47591	42587	25258	516407	3528840	253207	1.78829e+06	549146	452694	112724	104292	243547	211651
Henan	16	2016	4.0654	0.12572	0.716085	3880	0.707323	16014.4	2.00832	0.03	0.013533	0.0678858	19231.8	11696.7	27232.9	9532	0.485	4623.02	4908.98	36785	46833	43783	66658	44753	43592	55485	36591	62467	91212	48503	40417	59171	41903	36848	55087	61045	51908	50552	20827	451781	3.63257e+06	261791	1733718	561294	458357	109991	121649	299962	231375
Henan	16	2017	4.14	0.135681	0.737854	4180	0.722639	16036.2	2.107	0.028	0.014018	0.0703197	21165.5	12719.2	29557.9	9559.13	0.5016	4794.86	4764.27	40990	56661	46854	69799	48836	46683	61455	38932	72373	103314	53501	46979	68353	46699	39522	62807	74914	58161	59783	18260	402855	3532353	257234	1703341	513540	451730	103916	132086	296542	268183
Henan	16	2018	4.2141	0.116984	0.813837	4480	0.738053	16157.6	2.20006	0.03	0.014576	0.0729791	23161	13830.7	31874.2	9605	0.5171	4966.75	4638.25	44314	66394	52474	79134	53163	53682	71392	41804	79543	116047	58396	51501	83301	47609	45677	71053	77481	67815	68197	13526	342128	2333621	244761	1694384	367302	392692	79100	128302	281913	234795
Henan	16	2019	4.2517	0.10182	0.864562	4150	0.760435	16157.6	2.29622	0.032	0.014627	0.0755049	25293.4	15163.7	34201	9639.75	0.5321	5129.31	4510.44	47272	71822	56691	88544	54972	56584	75865	43111	79992	124240	60973	49706	89322	49073	46858	73598	81520	73108	73221	20638	296008	2220790	235358	1530621	368204	411917	77918	166283	295124	280112
Hubei	17	2003	1.8062	0.1698	0.570723	493	0.127001	4723.67	0.504881	0.043	0.013193	0.0526976	4569.03	2566.8	7322	5685	0.421061	2393.73	3291.27	5299	11556	10145	14247	9926	6923	11827	7134	16517	14539	10616	9943	14610	9131	8941	12098	12121	11697	12616	304805	112073	1491187	127255	301104	294830	317975	100974	37013	133150	44084
Hubei	17	2004	1.7159	0.174833	0.639345	649	0.137031	4823.72	0.541241	0.042	0.014918	0.0503894	5292.2	2890.01	8522.06	5698	0.426522	2430.32	3267.68	5566	12433	11108	15920	10649	7694	13931	8554	19451	17146	12232	10474	17153	10026	9958	13329	13460	13229	13909	326656	123268	1503141	123399	352027	274609	300686	94622	37589	129081	50283
Hubei	17	2005	2.3515	0.238062	0.623683	806	0.140806	4902.15	0.634349	0.043	0.014886	0.0497749	5555.85	3099.2	8785.9	5710	0.432	2466.72	3243.28	6243	14900	13669	19523	13275	9367	16718	9582	24150	19817	16296	13145	19890	11718	15239	15477	16026	15943	16950	306739	129837	1460195	130438	441496	275569	293331	65875	45303	131053	59424
Hubei	17	2006	2.8287	0.177766	0.702221	1120	0.149429	9778.97	0.707352	0.042	0.015106	0.0505375	6215.29	3419.4	9802.7	5693	0.438	2493.53	3199.47	6993	16163	14526	21272	13757	11978	19422	10032	29379	22161	16744	14032	24385	12254	15088	16754	17493	17597	19140	291618	130705	1.52198e+06	128510	517594	230361	276803	79003	58347	130112	57177
Hubei	17	2007	3.1117	0.213518	0.73175	1400	0.155589	9885.96	0.803656	0.042	0.01509	0.0523187	7314.82	3997.5	11485.8	5699	0.443	2524.66	3174.34	8559	20439	17726	26499	16712	14677	20645	11947	26357	28767	27189	16892	28952	13389	16049	21027	20357	21393	24512	208828	96356	1154326	122741	587605	182569	306666	46455	42809	147921	38851
Hubei	17	2008	3.3796	0.129916	0.721825	1750	0.161811	10132.7	0.893713	0.042	0.015234	0.0531108	8496.82	4656.4	13152.9	5711	0.452	2581.37	3129.63	10610	24727	22065	28872	18894	17158	22991	13484	29999	35661	21165	19248	32107	15706	18295	22437	22787	23082	26800	177224	100720	1124508	123635	617230	192328	322127	63152	41152	141385	46976
Hubei	17	2009	3.8286	0.106079	0.767373	2270	0.170559	10607.6	0.989782	0.042	0.020979	0.0550145	9328.11	5035.3	14367.5	5720	0.46	2631.2	3088.8	15777	28158	25183	32294	22485	20839	26874	16994	32431	43200	24520	23149	39246	18029	22387	28636	27507	27091	30392	157880	88073	1185083	119904	698228	201409	318290	66029	46199	158556	57341
Hubei	17	2010	4.2991	0.133779	0.783291	2620	0.183383	11092.6	1.17002	0.042	0.02095	0.057482	10914.7	5832.3	16058.4	5727.91	0.497	2846.77	2881.14	19541	31989	30689	39067	27661	25081	34668	20601	39222	49830	30760	26647	45518	21730	26086	34230	33751	32390	34198	138358	98602	1385297	118585	724781	214645	254154	76740	45379	161069	65850
Hubei	17	2011	5.4117	0.161053	0.795143	3300	0.192324	11444.2	1.28757	0.041	0.021188	0.0610886	12845.9	6897.9	18373.9	5758	0.5183	2984.37	2773.63	22045	35715	35824	46928	33600	29285	40364	23169	39229	58104	35569	30806	48816	24867	29296	35859	38436	35310	36364	93796	129826	1682169	178160	1.03139e+06	273513	255756	81947	56440	157610	81105
Hubei	17	2012	5.9876	0.140197	0.793439	3630	0.202232	11734.9	1.42978	0.038	0.021111	0.06598	14800.2	7851.7	20839.6	5779	0.535	3091.77	2687.23	23039	41417	39394	49626	37668	31447	49591	25661	44182	62301	41227	33454	51212	28085	30299	39270	42295	37397	39503	97064	119741	1605899	181825	970679	301322	243822	92495	56419	163344	99606
Hubei	17	2013	6.3106	0.151682	0.814171	3790	0.210019	12206.1	1.54704	0.035	0.021211	0.0705615	16519.9	8867	22906.4	5799	0.5451	3161.03	2637.97	24336	41853	42959	56047	44194	38099	49918	29452	56715	68047	42767	40533	61121	30664	31492	41068	48539	45201	39465	90963	89496	1908595	181323	1403952	417166	331914	121907	90969	173200	119695
Hubei	17	2014	6.3363	0.115402	0.814066	4130	0.21771	12745.2	1.66506	0.031	0.021149	0.0741339	18644.7	10849.1	24852.3	5816	0.5567	3237.77	2578.23	26962	48910	46966	72279	48331	41228	54620	33206	64563	76995	47049	43307	68102	34503	37433	50621	55133	51861	50738	92630	77842	1933310	166121	1441509	402905	344273	106062	105357	179869	123581
Hubei	17	2015	6.5032	0.073587	0.858338	4610	0.224814	13608.4	1.76961	0.026	0.021533	0.0765063	20489.4	11843.9	27051.5	5851.5	0.5685	3326.58	2524.92	29313	49231	49971	78034	51921	44691	60104	36190	72380	87293	51961	46244	74574	39690	39309	56114	62475	58510	55287	92051	70793	1.89421e+06	163051	1385035	393599	344077	99496	114659	194686	131236
Hubei	17	2016	5.9848	0.064797	0.869231	4760	0.230246	13995.6	1.69832	0.024	0.02192	0.0787276	22404.9	12725	29385.8	5885	0.581	3419.19	2465.81	31548	52788	54033	84106	54636	47355	64690	38323	86398	93701	55550	49220	81015	45147	43921	65298	69692	61018	66400	102999	64931	1860597	163792	1403585	397230	349680	93548	123274	209698	148977
Hubei	17	2017	6.0519	0.100782	0.875302	5080	0.644985	14496.2	1.80486	0.026	0.021688	0.0804588	24531.9	13812.1	31889.4	5902	0.593	3499.89	2402.11	35266	57643	58212	91195	56971	50961	72067	39720	88774	101551	58788	52106	93369	51270	45103	75350	79354	69129	77672	103399	55124	1.68395e+06	157154	1337790	390629	353677	93575	127373	215371	161531
Hubei	17	2018	5.8545	0.08869	0.876412	5410	0.656448	15547.6	1.88357	0.026	0.021633	0.080156	26722.3	14977.8	34454.6	5917	0.603	3567.95	2349.05	36099	73890	66094	98641	61658	58083	80963	42524	105918	98845	65731	58450	103272	57424	53445	85045	88178	79295	86118	97245	45221	1400839	150985	1245703	367713	348065	82964	135036	199345	163790
Hubei	17	2019	5.8607	0.110151	0.874981	4890	0.679889	15547.6	1.95357	0.024	0.021596	0.0785048	29329.3	16390.9	37601.4	5927	0.61	3615.47	2311.53	36612	82779	70883	103188	66459	64448	86428	48571	104540	102798	68818	59369	114627	62704	57156	91587	93189	83183	93390	89990	40208	1342883	146028	1196865	369327	309869	88370	180833	202045	177026
Hunan	18	2003	1.7018	0.15079	0.491776	465	0.095481	4024.22	0.606656	0.045	0.010956	0.0527192	4285.23	2532.9	7674.2	6663	0.340833	2270.97	4392.03	5291	9189	11312	15022	9328	10337	12565	9638	21361	18159	12959	13380	14853	9890	11274	13309	15122	15082	12818	181408	121555	799984	113836	312460	195381	255213	54663	47575	141064	32358
Hunan	18	2004	1.612	0.148112	0.578031	657	0.10327	4148.96	0.677099	0.044	0.012093	0.0523807	5094.67	2837.76	9190.21	6698	0.355282	2379.68	4318.32	6889	10838	12954	16442	10770	12047	14659	10162	26602	20507	13986	13632	16749	10907	14140	14529	17281	16299	14443	109473	113275	784526	114754	330607	185750	237798	59697	42696	146232	38784
Hunan	18	2005	2.4359	0.162364	0.674145	790	0.113603	4164.31	0.80039	0.043	0.014701	0.051819	5488.03	3117.7	9524	6326	0.37	2340.62	3985.38	6895	13698	14474	18302	12078	14627	17452	12477	29834	22881	15376	14344	17990	13052	14307	16625	19125	18438	16092	85457	108069	811036	105704	531338	138723	223855	70030	41678	136924	56083
Hunan	18	2006	2.6829	0.151533	0.695868	1020	0.118519	8113.69	0.878981	0.043	0.015137	0.0532517	6143.86	3389.6	10504.7	6342	0.3871	2454.99	3887.01	7923	15341	16762	20269	13192	16935	19379	14224	30502	22846	17415	15778	21407	13497	15374	18529	21846	21355	17810	85282	109533	816318	107420	584759	123580	219595	70171	43967	139720	61933
Hunan	18	2007	3.0027	0.157632	0.713539	1340	0.123364	8282.11	0.973583	0.043	0.015578	0.0561511	7297.67	3904.2	12293.5	6355	0.4045	2570.6	3784.4	10617	17346	19511	24528	16247	18771	21466	14594	31153	27529	21938	19487	26739	17006	18961	24191	26557	24767	22506	78246	112342	870261	105365	670743	126654	228012	72268	44915	149824	67258
Hunan	18	2008	3.2456	0.170606	0.729196	1720	0.129947	8714.26	1.08949	0.042	0.015674	0.0607365	8436.12	4512.5	13821.2	6380	0.4215	2689.17	3690.83	13322	21007	22188	29899	18566	22457	24484	15460	31775	31879	24337	20280	31400	19655	20629	27683	30647	26441	26071	91436	132099	911491	115208	669178	150026	223652	79119	51944	163597	77499
Hunan	18	2009	3.596	0.109065	0.744454	2190	0.137226	9037.06	1.19624	0.041	0.01561	0.065444	9304.73	4909	15084.3	6406	0.432	2767.39	3638.61	14519	22732	24716	31894	21079	24900	28722	17243	34616	38337	25034	22943	32558	20390	22865	28986	33461	30758	27790	51569	150109	987284	115935	716541	158584	217596	82786	49390	172812	82745
Hunan	18	2010	3.9786	0.117791	0.739426	2440	0.231458	10764.8	1.24866	0.042	0.015525	0.0665627	10360.6	5622	16565.7	6570.1	0.433	2844.85	3725.25	15435	24867	28691	36134	23674	27604	32921	19963	39592	44428	27550	25086	36381	22133	23740	31825	36476	32908	30156	52909	153521	1062435	121841	755701	162542	210287	90403	56700	186436	96974
Hunan	18	2011	4.898	0.125883	0.799199	3180	0.481336	10962.7	1.36305	0.042	0.01592	0.0666315	12104	6567.1	18844.1	6595.6	0.451	2974.62	3620.98	16878	31827	35652	39249	27890	33143	39267	23623	41330	56704	33394	27804	41841	22051	31027	35044	42073	38532	32611	53817	153472	1290418	143111	873375	173261	231570	90557	68597	203600	92819
Hunan	18	2012	5.2502	0.09328	0.806314	3620	0.627857	11050.6	1.46511	0.042	0.018226	0.0653443	13914.6	7440.2	21318.8	6638.93	0.4665	3097.06	3541.87	20624	36492	39788	43086	32676	35622	45477	25783	47314	65336	37834	33093	45204	24673	35554	38596	50067	43448	35015	24170	151897	1281843	156673	946016	187470	236033	95143	70520	207382	99429
Hunan	18	2013	5.2722	0.10799	0.827919	3740	0.658805	11114.1	1.56125	0.042	0.015993	0.0647619	15586.2	8372.1	23414	6690.6	0.4796	3208.81	3481.79	21744	37388	43356	51793	36989	38649	49583	29931	54344	77457	42022	35201	47101	27238	34523	41389	54704	48902	37143	22820	154984	1342319	166432	1073926	233409	245341	95422	73190	212003	111602
Hunan	18	2014	4.9758	0.085453	0.841133	3860	0.655639	11154.4	1.6599	0.041	0.018405	0.0647668	18196.3	10060.2	26570.2	6737.24	0.4928	3320.11	3417.13	23507	40044	47709	55815	40177	44427	53816	32304	58884	84674	45314	37915	49931	30265	39471	46424	60180	53924	41186	22389	125879	1306525	165349	1079229	206987	251949	84960	76234	223754	119510
Hunan	18	2015	4.9634	0.065622	0.854499	4280	0.654604	11184.4	1.76938	0.041	0.018281	0.0651714	20074.1	10992.5	28838.1	6783.03	0.5089	3451.88	3331.15	29354	42553	51265	60432	43049	45981	60105	34414	68020	92826	48892	44013	55910	35172	42499	53411	69475	62665	48004	23780	102625	1217533	173191	1062766	212626	244052	83430	72408	240419	123570
Hunan	18	2016	4.9816	0.057662	0.858597	4540	0.660671	11249.9	1.89165	0.042	0.01803	0.0651244	22139.4	11930.4	31283.9	6822	0.5275	3598.6	3223.4	33221	45059	54423	65241	45492	50545	65487	36919	76123	97704	53344	46985	62232	41319	45946	64965	77796	69158	56054	21088	81486	1092880	166248	1087414	202351	239892	74396	74037	253367	121540
Hunan	18	2017	5.0015	0.080937	0.869186	4810	0.670729	11318.4	2.00917	0.04	0.018075	0.0661294	24412.6	12935.8	33947.9	6860.15	0.5462	3747.01	3113.14	37936	47119	58552	69371	47439	54770	71387	39158	81785	99320	55748	49580	71425	47341	47600	73527	87879	76383	64263	25374	71491	1090427	157411	1102074	193409	234487	68249	69322	267211	126582
Hunan	18	2018	4.9213	0.137724	0.825899	5070	0.696826	11358.2	2.08906	0.036	0.015799	0.0680309	26756.3	14092.5	36698.3	6899	0.5602	3864.82	3034.18	43266	53786	64970	75143	52645	59850	80240	41009	96561	93694	63493	53070	84226	53583	60798	79209	95776	89668	72755	21663	53397	952652	148630	1068197	202375	218832	62689	67925	276451	124597
Hunan	18	2019	4.8515	0.12658	0.86742	4770	0.718579	11358.2	2.18666	0.027	0.018068	0.0690747	29383.4	15394.8	39841.9	6918.38	0.5722	3958.7	2959.68	51094	57568	70427	94307	56072	61756	85170	39842	95989	91162	69065	61921	87971	53697	66351	77474	98446	98085	76565	13519	49950	943008	151016	1050239	216982	259488	62874	81410	356776	140727
Guangdong	19	2003	3.8807	0.138242	0.679726	257	0.165372	1717.72	0.481829	0.029	0.008591	0.0582026	8931.43	4054.6	12380.4	8963	0.585749	5250.07	3712.93	8990	12961	15763	28574	14608	18296	25936	14778	42966	33426	22312	21306	32963	16257	17832	20449	25157	25901	25642	132348	40198	2837913	195846	546082	408542	437376	198513	117411	281826	144964
Guangdong	19	2004	3.6352	0.130398	0.711004	329	0.174405	1754.56	0.489133	0.027	0.010317	0.0573674	10679.4	4365.87	14953.4	9111	0.596319	5433.06	3677.94	9894	17617	17007	31503	15639	21279	29258	16265	45624	38317	23977	24644	37952	17850	19665	22660	28248	30105	29220	120254	38772	3.18146e+06	197276	550657	394731	450525	210300	126286	291168	174635
Guangdong	19	2005	4.5586	0.077135	0.736051	392	0.195356	1795.11	0.492935	0.026	0.011094	0.0577711	10806.7	4690.5	14769.9	9194	0.6068	5578.92	3615.08	10120	23841	18019	34042	17375	23954	32589	17423	48972	44171	25113	24463	40625	19296	19755	24571	30689	32926	33027	106417	32523	3599821	195534	585929	405613	473122	221535	140288	298905	208857
Guangdong	19	2006	4.5386	0.095148	0.753471	477	0.208888	2896.61	0.51953	0.026	0.011121	0.0584593	11969.4	5079.8	16015.6	9442	0.63	5948.46	3493.54	11113	26705	20349	37480	19491	26655	34656	18693	52641	53079	26380	27023	46668	20299	22512	26359	33188	35485	34975	102688	33405	3910713	202399	603628	398188	482778	230702	149034	304590	228523
Guangdong	19	2007	4.7893	0.132318	0.771429	642	0.230538	2950.33	0.518722	0.025	0.011284	0.0599918	13248.3	5624	17699.3	9660	0.6314	6099.32	3560.68	11857	31631	22547	44382	20867	28013	37774	19369	57805	66906	28959	30373	52330	23316	24172	31396	37788	38155	39796	98916	33970	4229840	194120	601338	404642	487730	239101	158217	323535	238582
Guangdong	19	2008	4.7795	0.080543	0.794362	799	0.247062	2967.67	0.577817	0.026	0.012635	0.060885	14849	6399.8	19732.9	9893.48	0.6337	6269.5	3623.98	12905	36224	25249	48868	22917	32093	42613	20944	61210	78781	32450	34755	58143	26081	26982	34306	42314	40962	44661	98922	34321	4164723	185354	595859	408375	492708	241281	162076	354830	240886
Guangdong	19	2009	4.8395	0.100362	0.79153	987	0.268152	3014.5	0.59067	0.026	0.012734	0.0616027	16206.3	6906.9	21574.7	10130.2	0.634	6422.54	3707.65	14469	41176	27578	54496	25509	34418	45631	22542	61118	84721	34240	38192	61896	28360	27343	38205	46609	44252	49837	91964	33348	4434591	185085	631542	407583	535351	237172	167264	374885	260846
Guangdong	19	2010	5.4435	0.087842	0.78007	1150	0.323037	10563.6	0.664097	0.025	0.012547	0.059857	18484.1	7890.3	23897.8	10440.9	0.6618	6909.81	3531.13	15270	47254	31277	58158	29019	38378	49623	24781	68204	90519	37590	41195	69434	31351	29956	42928	52308	47213	53350	88150	33930	4766581	187585	643889	426028	560969	252327	175707	411676	290336
Guangdong	19	2011	6.2041	0.086266	0.779469	1520	0.438658	3132.22	0.68624	0.025	0.012756	0.0622067	21026.4	9371.7	26897.5	10505	0.665	6985.83	3519.17	16790	53944	35772	64475	32872	44000	54890	28376	72847	97916	45109	47537	78743	35804	33954	48342	57684	53259	57500	82179	32113	5189655	198558	926834	555792	618479	289944	197352	460858	333786
Guangdong	19	2012	6.4023	0.086768	0.7931	1700	0.593666	3255	0.722918	0.025	0.013026	0.0627788	23809.7	10542.8	30226.7	10594	0.674	7140.36	3453.64	20315	56370	41712	72974	36540	48345	58895	31378	80595	101308	49644	51342	85565	41107	36844	53743	65942	56081	62700	72251	34437	5409380	200800	1075838	649729	617985	322825	185936	475908	348584
Guangdong	19	2013	6.3379	0.087788	0.798821	1690	0.613482	3308.61	0.747459	0.024	0.012965	0.0656647	26184	11669.3	33090	10644	0.6776	7212.37	3431.63	24884	71465	45829	89166	42074	51767	65980	35460	100186	117219	53601	60605	90557	43548	42187	58947	69057	65268	65245	61724	29402	10202491	321821	1622781	955253	833076	393419	332575	433282	524731
Guangdong	19	2014	6.2084	0.096012	0.806489	1770	0.672986	11783	0.767088	0.024	0.013148	0.0693213	25779.3	12245.6	32148.1	10724	0.68	7292.32	3431.68	28823	78585	52308	94750	46946	56534	72211	38789	108465	127285	60404	62547	96537	44666	44896	63789	74377	69745	69684	56702	29903	10151605	308037	1.49406e+06	958407	853999	370551	346340	431507	558406
Guangdong	19	2015	7.2473	0.086859	0.82	2030	0.699253	12001.3	0.794485	0.025	0.013181	0.0734462	28062.1	13360.4	34757.2	10849	0.6871	7454.35	3394.65	31380	86026	57419	102758	51001	61351	79680	43745	126083	138069	66768	66376	98929	48589	47483	72368	80838	80069	79848	52841	30225	9810051	307096	1415548	968168	827938	371189	353120	460716	590938
Guangdong	19	2016	6.7654	0.118695	0.826028	2180	0.721493	3535.06	0.705643	0.025	0.013547	0.0768045	30547.3	14512.2	37684.3	10999	0.692	7611.31	3387.69	36431	91276	62383	110242	55263	67451	84444	46149	135859	135412	74014	69755	111233	53716	49297	83234	94663	93300	89550	47749	27882	9596959	312727	1432627	1027835	811332	370486	435099	518184	618253
Guangdong	19	2017	6.8274	0.122172	0.828348	2330	0.704969	3562.17	0.715903	0.025	0.01352	0.0799974	33378.7	15779.7	40975.1	11169	0.6985	7801.55	3367.45	40926	104687	66823	119094	57839	71209	91022	46454	147039	149936	79479	77407	125634	58945	53418	95136	107710	104446	103752	45941	24535	9293607	299182	1542107	1026534	833312	365200	498638	488928	663147
Guangdong	19	2018	6.4466	0.129238	0.836232	2560	0.668139	12238.3	0.730946	0.024	0.013485	0.081611	36379.2	17167.7	44341	11346	0.707	8021.62	3324.38	44141	123138	74030	133553	64747	78928	97888	48828	158044	166402	86137	84159	141024	67262	55885	109022	118701	116940	116738	41200	21791	8824778	279553	1690284	1078159	864093	406566	607831	612993	770681
Guangdong	19	2019	6.3122	0.101338	0.84	1300	0.631855	12238.3	0.74531	0.023	0.013367	0.0809704	39738	18818.4	48117.6	11521	0.714	8225.99	3295.01	57306	142341	79087	142631	72193	85209	107503	50378	175333	163491	91931	86456	144174	73361	58257	117500	148119	130164	135313	23974	17478	8358409	257061	1327743	1147228	825844	406078	662368	843755	859619
Guangxi	20	2003	1.7809	0.117065	0.7	844	0.05456	2476.74	0.509411	0.036	0.009265	0.0500064	3884.33	2094.5	7785	4857	0.314529	1527.67	3329.33	6643	10865	11156	17571	10604	8558	13999	8001	23783	17341	12596	10396	14944	10166	12021	11344	13800	12926	13912	140544	47509	575832	82958	168081	149086	174543	50863	27023	80444	23491
Guangxi	20	2004	1.6847	0.120495	0.7	1060	0.05713	2529.83	0.549905	0.041	0.010022	0.0502338	4588.22	2305.22	9324	4889	0.325271	1590.25	3298.75	7551	13143	12829	20192	11683	9865	15724	8782	27152	20363	13887	11316	18588	10959	12090	12759	15535	15575	15488	138796	48445	573125	82281	192646	144451	168619	46019	33540	78143	24165
Guangxi	20	2005	2.3325	0.164078	0.8	1050	0.062017	2627.25	0.617462	0.042	0.010944	0.0503845	4778.17	2494.7	9286.7	4660	0.3362	1566.69	3093.31	8703	15936	14626	22510	14032	11383	17961	9931	28600	23545	14566	13364	19123	11989	12026	14513	17785	17006	17385	136726	51901	566824	79874	225666	136684	174213	47820	35650	79077	31383
Guangxi	20	2006	2.5406	0.163935	0.8	1120	0.064209	3827.03	0.652004	0.041	0.011655	0.0514371	5239.74	2770.5	9898.8	4719	0.3464	1634.66	3084.34	9917	17361	16805	24938	15809	13133	20201	10737	27096	28118	16508	14170	22046	12846	14930	16495	20318	20115	19833	134910	49509	566151	80608	213854	128106	174720	48474	37718	78970	32744
Guangxi	20	2007	2.8516	0.264755	0.8	1240	0.068268	3991.61	0.699653	0.038	0.011745	0.0528223	6477.11	3224.1	12200.4	4768	0.3624	1727.92	3040.08	11959	20909	19408	29295	17963	15772	23818	12217	32673	36727	19136	16287	26192	14436	15124	20780	24254	23668	25315	131627	51423	576183	81579	218475	120893	181051	44976	33807	85433	33511
Guangxi	20	2008	3.0896	0.185873	0.8	1410	0.076433	4206.48	0.797122	0.038	0.012043	0.0539107	7680.2	3690.3	14146	4816	0.3816	1837.79	2978.21	13617	22385	21181	33704	21207	18503	28112	13816	36558	45979	23481	19600	30827	16189	18582	24374	27399	28627	31166	121342	54231	584381	85147	235635	118160	174922	44627	33099	87855	35888
Guangxi	20	2009	3.4125	0.151321	0.8	1870	0.084704	4258.09	0.864029	0.037	0.014003	0.0550677	8477.07	3980.4	15451.5	4856	0.392	1903.55	2952.45	15397	24110	23508	35386	23506	22562	30917	15692	39250	51315	25223	21259	33162	18456	22235	27220	29678	31565	32717	109642	43386	592296	88110	275516	115863	175170	44798	35333	93953	37307
Guangxi	20	2010	4.0485	0.168774	0.8	2390	0.145271	4312.8	1.00072	0.037	0.015184	0.0558621	9551.6	4543.4	17063.9	4610	0.4	1844	2766	17023	28708	26179	39264	27688	26093	33697	17211	42633	60153	27597	25994	36182	20150	21791	32182	33100	32141	33864	107910	43827	625095	89565	305035	119119	180035	42942	35717	97751	42685
Guangxi	20	2011	4.7304	0.170247	0.8	2800	0.275544	4444.45	1.12192	0.035	0.01507	0.0556762	10925.6	5231.3	18854.1	4645	0.418	1941.61	2703.39	18387	33527	30206	42794	29311	29757	38229	20310	43143	64836	29253	25081	38626	21488	24978	32909	37358	31609	34830	108302	47463	677898	92084	387018	128162	184347	43156	42085	110066	49458
Guangxi	20	2012	5.0449	0.079636	0.8	2990	0.445323	4572.29	1.20877	0.034	0.014951	0.0559882	12639.4	6007.5	21242.8	4682	0.4353	2038.07	2643.93	19511	34933	33317	46784	36449	32923	43413	24712	45815	69852	31776	27949	40093	24268	28566	34339	42778	36314	35777	99260	52832	718610	98378	425239	128422	184799	47600	44284	116635	53961
Guangxi	20	2013	4.9154	0.079491	0.9	3180	0.466709	4719.66	1.29895	0.033	0.014834	0.0713298	14191	6790.9	23305.4	4719	0.4481	2114.58	2604.42	23430	37414	38245	55724	39126	37762	49651	25500	58162	82062	35230	33584	48101	28505	34921	38350	47276	40389	40748	91409	43566	808122	147388	608630	140750	212419	54101	52360	115919	77624
Guangxi	20	2014	4.7982	0.101652	0.9	2940	0.477808	4868.64	1.38993	0.032	0.014724	0.0576893	16038.3	8683.2	24669	4754	0.4601	2187.32	2566.68	26186	44610	42245	62789	43772	42787	54638	28759	65285	86500	40344	36951	52236	31189	37218	41021	53785	46735	42220	82798	37971	781960	140576	609645	132932	209094	50128	44580	117620	79528
Guangxi	20	2015	4.994	0.066795	0.9	3340	0.48334	4999.7	1.49783	0.029	0.014595	0.0586034	17442.9	9466.6	26415.9	4796	0.4706	2257	2539	30875	46260	46121	70548	45246	46031	61137	30597	76688	92062	45020	43732	63754	36666	43299	54505	64821	56579	55953	81813	29982	762085	138609	651566	133996	200340	47820	43516	132711	79300
Guangxi	20	2016	4.8771	0.117162	0.9	3310	0.521455	5107.92	1.40412	0.029	0.015089	0.0580803	18997	10359.5	28324.4	4838	0.4808	2326.11	2511.89	33131	50397	49835	73851	47079	49369	65433	31884	84064	89936	52588	48058	68957	40320	45729	60395	71529	62365	65218	78057	31114	724268	137440	648694	135124	194274	45976	42259	142951	79589
Guangxi	20	2017	4.9345	0.118526	0.9	3480	0.528905	5222.84	1.47435	0.022	0.015148	0.0574354	20762.3	11325.5	30502.1	4885	0.4921	2403.91	2481.09	36875	56445	54653	78609	50900	54245	74059	34155	93936	96818	55688	51375	79025	44261	48314	67993	79005	70016	70371	72575	34253	668708	117905	651386	127344	190175	44410	40165	146658	78815
Guangxi	20	2018	4.8153	0.107594	0.900718	4060	0.551259	5416.06	1.52959	0.023	0.015428	0.0574517	22479.5	12434.8	32436.1	4926	0.5022	2473.84	2452.16	41958	61113	60370	90699	55047	60089	81633	38922	91934	103446	71155	57627	87768	47402	55287	74077	88795	77963	76099	58941	29697	529696	101641	667752	124536	188005	44239	49399	155830	78301
Guangxi	20	2019	4.8535	0.218888	0.9	5240	0.575242	5416.06	1.58289	0.026	0.015726	0.0578271	24440	13675.7	34744.9	4960	0.5109	2534.06	2425.94	48490	63921	65825	101726	61181	65962	89805	40913	107824	103138	78247	63424	95268	50297	55714	77881	100523	78402	78328	54293	13677	499975	100094	718537	129596	190555	43678	45243	195976	90944
Hainan	21	2003	2.6892	0.08493	0.48	750	0.14394	6140.29	0.4875	0.034	0.013564	0.0536056	4636.37	2588.1	7259.3	811	0.43849	355.615	455.385	4784	8264	9929	15928	9190	8810	15571	8352	27898	19979	12017	10607	11709	9465	12538	13353	15329	14726	14785	204669	11505	69623	20344	44523	33548	36131	30895	6331	19013	10688
Hainan	21	2004	2.5388	0.08747	0.47	913	0.146712	6139.12	0.537684	0.034	0.017115	0.0546418	5179.25	2817.62	8121.85	818	0.445235	364.202	453.798	6212	11150	12068	17624	10845	9943	17503	10184	37486	25724	13942	12691	13758	10693	13259	16036	17712	16219	17099	189814	11182	72589	19787	52191	28851	41651	32129	7090	18543	14091
Hainan	21	2005	3.3158	0.10883	0.5	1050	0.146037	6224.12	0.591104	0.036	0.018116	0.0557695	5318.19	3004	8123.9	828	0.452	374.256	453.744	6344	15337	12833	18829	12082	11199	21504	10869	44996	28094	15625	15144	15174	11918	16075	18665	19642	18082	19854	184278	10912	71789	19471	52942	28603	41910	31161	9348	18161	13981
Hainan	21	2006	3.4316	0.216486	0.52	1200	0.157895	5169.71	0.661335	0.036	0.017943	0.0558946	6085.86	3255.5	9395.1	836	0.461	385.396	450.604	7157	16699	15438	23741	12511	12405	24626	12241	42635	33667	16476	16560	16647	11881	15918	20560	20305	20302	20905	184917	8346	68796	20696	55749	27648	41254	34007	8251	17199	15788
Hainan	21	2007	4.0368	0.100163	0.53	1660	0.167692	5232.06	0.737404	0.035	0.016568	0.0569834	7192.4	3791.4	10996.9	845	0.472	398.84	446.16	9122	18580	17125	27921	15384	15516	29527	14279	44599	40475	18762	17703	20028	13660	14657	24388	24116	22776	28125	179814	8699	73919	19990	51017	28912	41436	37213	8155	18941	17670
Hainan	21	2008	4.7136	0.110553	0.57	2580	0.182865	5459.71	0.839762	0.037	0.017561	0.0571026	8334.54	4390	12607.8	854.18	0.48	410.006	444.174	10823	24119	18914	32599	17677	18609	34239	15633	52976	43707	20430	20762	23619	15181	18233	26570	27172	24469	30015	167203	8983	72975	18215	49441	28362	41683	38045	6345	19433	22014
Hainan	21	2009	5.4308	0.066483	0.59	3120	0.194544	5894.41	0.900916	0.035	0.019674	0.0584888	9169.29	4744.4	13750.9	864.07	0.4913	424.518	439.552	10855	30234	21840	35313	24129	21818	37642	16160	56358	52674	22834	18471	26211	17131	21192	31451	29251	25196	31489	145680	8965	75417	18900	62396	31896	42353	39964	6886	19616	24282
Hainan	21	2010	6.2168	0.099457	0.63	3680	0.280007	6245.88	0.966762	0.03	0.019573	0.0592231	10407.6	5275.4	15581.1	868.55	0.498	432.538	436.012	18042	30151	26772	40553	25237	23955	42036	18875	60215	62984	26157	20703	30680	20652	20526	40791	35308	29492	39376	122717	8993	80444	19513	67549	35177	43013	43658	7274	21078	31805
Hainan	21	2011	7.6788	0.134059	0.66	4790	0.466161	6740	1.02233	0.017	0.019376	0.0585359	12467.1	6446	18369	877.38	0.505	443.077	434.303	21906	39104	30601	42392	31560	29966	50691	22449	65525	67337	33787	24530	37584	24340	23229	46225	43210	34700	43316	118336	9974	83665	19819	55839	44003	46314	51949	9748	24010	34864
Hainan	21	2012	7.9223	0.100491	0.68	4960	0.545598	7136.76	1.11795	0.02	0.019175	0.0620535	14379	7408	20917.7	886.55	0.516	457.46	429.09	20436	39582	34682	48513	36529	35386	51948	27559	67537	69316	38460	28064	41682	26254	25199	50258	50136	35410	47110	119028	9792	94934	21191	59515	53711	45144	62179	9968	27660	42436
Hainan	21	2013	7.9456	0.074476	0.78	5140	0.562506	7309.41	1.18645	0.022	0.018988	0.0639162	16035.4	8342.6	22928.9	895.28	0.5274	472.171	423.109	20032	45707	41841	52156	41126	32411	58729	33564	78812	75429	47873	46747	46333	31753	28983	54503	53771	43622	50047	47698	7946	106098	22146	76903	128096	54404	67659	12996	27838	58401
Hainan	21	2014	7.9191	0.094195	0.81	5420	0.572343	7647.65	1.23824	0.023	0.018816	0.0691351	17747.5	9912.6	24486.5	903.48	0.5376	485.711	417.769	27085	51548	46193	58756	40441	44798	63079	36371	79160	88362	50881	49476	51248	36609	27880	60421	59793	47717	54158	103624	6955	97031	22669	73155	59403	54286	64923	15648	34324	73708
Hainan	21	2015	7.7848	0.107139	0.82	5930	0.582881	7900	1.23349	0.023	0.018664	0.0731404	19400.5	10857.6	26356.4	910.82	0.5512	502.044	408.776	28438	59916	51501	69263	44149	48249	70737	40914	115013	93187	53552	49311	59332	40876	29606	72559	70489	56348	62894	88088	6362	88127	23918	69072	56181	65287	59528	15329	40956	76967
Hainan	21	2016	7.9779	0.090043	0.81	7090	0.554962	8299.12	1.30339	0.024	0.019629	0.07528	21274.4	11842.9	28453.5	917	0.5678	520.673	396.327	28016	60886	55265	74214	45557	51227	74464	42978	105687	102747	57788	53663	68888	45453	39352	75219	74765	63699	66612	75956	5326	81172	23360	71041	57960	69683	60095	16216	42603	83545
Hainan	21	2017	7.7325	0.073257	0.83	7560	0.568898	9024.71	1.43318	0.023	0.020518	0.0779064	23300	12901.8	30817.4	926	0.5804	537.45	388.55	34665	58005	59599	81116	44056	58403	81288	46769	124017	117551	62248	60784	78517	46733	36522	79753	79350	67235	69342	55792	5008	77959	21496	62559	57344	70685	58930	19239	47517	91608
Hainan	21	2018	8.3352	0.059842	0.929192	8890	0.595503	10300.9	1.46783	0.023	0.021413	0.0789932	25422.8	13988.9	33348.7	934	0.5906	551.62	382.38	43624	68748	66980	88595	46019	64565	84586	56134	117730	120250	69427	68976	90573	50606	44647	88920	85815	75795	80102	39491	4552	72113	21594	57255	54788	76296	60546	21986	49974	85894
Hainan	21	2019	8.2027	0.019309	0.93	7410	0.620184	11207.9	1.44929	0.023	0.02117	0.078764	27494.3	15113.1	36016.7	944.72	0.5923	559.558	385.162	46118	65584	73015	100756	49564	71902	97580	55411	113936	131952	74132	68451	92199	51710	40725	98265	98159	79343	83064	29276	4560	72665	21938	61500	56217	72898	55370	21825	51360	81636
Chongqing	22	2003	2.5162	0.257064	0.7	642	0.099894	3816.16	0.416123	0.041	0.011772	0.0528579	4585.81	2214.6	8093.7	2803.19	0.403329	1130.61	1672.58	8875	9725	11883	16372	10028	10497	12506	9412	25298	22300	12174	10805	14478	9359	12920	12865	13472	15537	14003	24646	70538	549374	57952	310358	103184	146220	25137	18988	65603	30671
Chongqing	22	2004	2.4047	0.237891	0.8	788	0.101647	3930.01	0.455278	0.041	0.012173	0.0531627	5673.69	2510.41	9910.09	2793	0.427489	1193.98	1599.02	9878	12432	13751	19580	11194	12560	14806	10705	30607	25882	13518	12296	16928	10454	12187	14506	15937	19800	16100	23615	84959	530675	56640	348676	94631	145940	25622	22552	69672	28839
Chongqing	22	2005	3.2528	0.302227	0.8	965	0.103717	11934.1	0.506097	0.041	0.012509	0.053541	6169.56	2809.3	10243.5	2798	0.452	1264.7	1533.3	10669	15458	15533	21190	12860	13769	16399	11382	30895	32578	14854	15645	22583	14659	13530	16753	19193	21265	19940	21436	86105	540879	58003	343158	92281	138628	30620	24071	71641	31401
Chongqing	22	2006	3.6084	0.296726	0.8	84.2	0.112999	12187	0.547885	0.04	0.013533	0.0537606	6934.79	2873.8	11569.7	2808	0.467	1311.34	1496.66	12253	17709	18367	25079	15018	16263	18496	12830	34147	33511	18232	17519	27813	12293	15100	19003	21813	23075	22537	21354	87437	530752	59058	364778	99698	131791	31535	24095	68480	31662
Chongqing	22	2007	4.0943	0.250849	0.8	1460	0.122443	12722.4	0.591169	0.04	0.013494	0.0537451	7899.3	3509.3	12590.8	2816	0.4834	1361.25	1454.75	14816	21686	21290	30676	17898	19325	21481	14077	36929	38918	23275	19417	33253	15083	19637	23388	26502	27244	27960	18133	88799	554145	60826	375036	100647	126944	35849	24966	80378	42231
Chongqing	22	2008	4.5249	0.21732	0.8	1800	0.143043	13199.5	0.636012	0.04	0.016555	0.0519999	9245.88	4126.2	14367.6	2839	0.4999	1419.22	1419.78	16459	25985	24131	39953	20658	22129	25090	15309	42810	44635	23666	21085	41326	17280	19217	27487	32535	27752	32591	18319	92029	559674	64738	411448	111188	138384	36640	26926	90800	46134
Chongqing	22	2009	5.0949	0.302149	0.8	2340	0.172368	13481.3	0.698678	0.04	0.017838	0.0508342	10292.7	4478.4	15748.7	2859	0.5159	1474.96	1384.04	18713	28012	27770	44577	23741	25745	28250	17129	49529	49871	28699	22253	47818	19162	22446	33873	37688	30383	35019	17084	95343	574146	64215	433209	111757	134554	42483	25462	97491	48761
Chongqing	22	2010	6.3534	0.19604	0.8	2840	0.482455	14210.1	0.790293	0.039	0.018373	0.0514244	11774.7	5276.7	17532.4	2884.62	0.5302	1529.43	1355.19	20544	31491	31894	50326	27730	29667	33613	21389	62634	58751	32396	25440	55381	21818	26049	37497	44249	34163	36936	18693	94170	624629	66151	479505	111448	143128	42606	28598	106572	55865
Chongqing	22	2011	8.4954	0.217504	0.8	3770	0.607297	14406.1	0.869025	0.035	0.020212	0.0527716	14056.3	6480.4	20249.7	2919	0.5502	1606.03	1312.97	31330	37703	36466	58756	32064	34675	39819	24388	63176	72277	40273	28146	65560	26411	28253	44029	51559	43786	44028	15911	104023	796169	68967	828172	163942	151498	71242	39394	114984	72546
Chongqing	22	2012	8.813	0.244303	0.8	4410	0.627436	14669.3	0.917171	0.033	0.020374	0.0551608	16263.5	7383.3	22968.1	2945	0.5698	1678.06	1266.94	34254	41848	40448	63028	35581	39568	48702	27936	70598	87720	46012	33512	71712	30555	31991	48581	60072	46882	46751	12924	103873	822507	74994	851617	198069	157561	71293	39429	130264	78198
Chongqing	22	2013	7.9022	0.209517	0.9	4040	0.638384	14926.6	0.969044	0.034	0.021212	0.0569987	18182.2	8332	25216.1	2970	0.5834	1732.7	1237.3	35415	45092	47621	67647	43375	44484	55089	31090	73598	100437	50317	37097	78204	34480	35535	51560	62470	53723	48733	11396	101350	864299	69789	1036407	220882	260834	70802	48920	131173	101117
Chongqing	22	2014	7.46	0.261332	0.9	4350	0.647857	15479	1.02853	0.035	0.02106	0.05923	18821.6	9489.8	25147.2	2991.4	0.596	1782.87	1208.53	38064	48429	53207	70321	46037	48735	56039	35076	84189	115065	56872	39615	83498	39051	40900	61875	73471	59598	56512	11762	89860	892655	70237	1038066	228250	272819	67529	46500	132123	123851
Chongqing	22	2015	7.3949	0.200123	0.9	4640	0.649881	17077.9	1.10332	0.036	0.021216	0.0628279	20702.5	10504.7	27238.8	3016.55	0.6094	1838.29	1178.26	41146	52541	57993	74068	48586	52454	60296	35994	92958	120355	59813	44070	87023	42617	42910	71512	81600	61544	64506	11738	73480	901939	66811	1015098	221155	271210	63368	46672	132803	125159
Chongqing	22	2016	7.0811	0.161695	0.9	4920	0.67851	17365.9	1.15707	0.037	0.021325	0.0657322	22855.1	11548.8	29610	3048	0.626	1908.05	1139.95	47529	55396	62584	79388	51537	56048	63717	37457	100517	126739	63852	48141	92787	48241	46015	76236	87162	65146	75554	11016	56272	892939	64303	1001775	206607	264857	63535	45809	139834	130140
Chongqing	22	2017	7.0278	0.201518	0.9	5530	0.682306	17968.5	1.22488	0.034	0.021137	0.0655296	25168.9	12637.9	32193.2	3075.16	0.6408	1970.56	1104.6	54385	60198	65745	83021	54221	59596	70036	38974	112043	123836	66969	48456	102239	51684	47979	89251	96197	69873	85604	11669	40503	837781	64709	977401	194727	270137	60656	47844	143960	138819
Chongqing	22	2018	6.6528	0.216079	0.9	5800	0.699807	19135.2	1.33434	0.033	0.020954	0.0646691	27607	13781.2	34889.3	3102	0.655	2031.81	1070.19	49774	85100	69467	86608	59605	66828	78996	41547	123128	133454	74343	50412	115365	62435	49131	101579	108037	79351	97843	8708	41270	798603	60683	888782	194456	225476	59833	48845	140797	145905
Chongqing	22	2019	6.445	0.138206	0.896498	5440	0.733088	21176.7	1.41236	0.026	0.020805	0.0646846	30367.2	15133.3	37938.6	3124.32	0.668	2087.05	1037.27	56904	74446	75994	92949	62887	74946	89459	48759	131356	127222	82135	59727	128155	69792	55001	105418	114811	82344	102768	6719	30832	645231	61662	786599	222986	214978	44703	47360	206355	137469
Sichuan	23	2003	1.7591	0.237398	0.7	489	0.074064	2347.32	0.332243	0.044	0.007583	0.0518211	3691.98	2229.9	7041.9	8176	0.303841	2484.2	5691.8	8902	10613	11172	15303	9255	10055	13171	9192	23069	20550	12688	12559	19913	9859	13180	12825	14861	13779	14532	112681	191906	1194494	156184	723558	206529	225183	45546	46547	161165	42104
Sichuan	23	2004	1.6929	0.24308	0.7	667	0.082573	2348.21	0.363068	0.044	0.008405	0.0513109	4338.02	2518.93	8261.44	8090	0.316776	2562.71	5527.29	9264	12986	12744	17232	10250	11901	15149	10349	28146	24090	13583	15150	21545	11044	13960	13989	16891	17117	16048	102319	186419	1159788	151668	723963	197362	219438	47472	51169	162170	42156
Sichuan	23	2005	2.2354	0.253849	0.7	743	0.096616	2388.87	0.396526	0.046	0.008768	0.0522963	4645.26	2802.8	8386	8212	0.33	2709.96	5502.04	10016	16826	14275	19460	11234	14138	17672	11072	32828	27519	14613	19399	25303	11961	18309	15149	18868	18865	18006	93167	205088	1177767	153111	766749	191409	227940	51934	51227	171761	42945
Sichuan	23	2006	2.4893	0.26691	0.7	943	0.103158	3427.5	0.436902	0.045	0.009303	0.0535402	5179.66	3002.4	9350.1	8169	0.343	2801.97	5367.03	11224	18682	16404	21469	12839	15682	20776	12555	32229	28282	16765	19556	29754	13014	17605	16374	21205	20204	19405	90515	220137	1186911	150546	804546	179286	230299	49423	50671	163700	48001
Sichuan	23	2007	2.8999	0.253188	0.7	1230	0.112883	3934.25	0.48207	0.043	0.009352	0.0555947	6235.07	3546.7	11098.3	8127	0.356	2893.21	5233.79	13377	21752	18906	25518	14902	17321	23420	14493	34622	33843	19928	25107	36394	15629	22115	20937	25887	23597	24960	83891	232981	1203673	152825	902648	186127	240946	51085	50248	168466	53171
Sichuan	23	2008	3.9985	0.146985	0.7	2460	0.12508	4663.11	0.527551	0.046	0.009585	0.0559858	7304.76	4121.2	12633.4	8138	0.374	3043.61	5094.39	15231	28632	22046	30484	17746	20949	27344	16531	37462	42055	21818	26158	42806	16901	18493	23491	30020	25859	29540	71193	231926	1238586	153793	937875	182072	232188	49861	51795	179433	50918
Sichuan	23	2009	4.4835	0.108825	0.7	3050	0.143702	5172.41	0.588484	0.043	0.01124	0.0537004	8091.12	4462.1	13839.4	8185	0.387	3167.6	5017.4	17748	31954	24448	33176	20639	24786	31675	19062	38839	43556	25408	30377	47858	19106	21319	29495	33082	28291	32314	51304	219114	1230931	154171	996475	174865	237505	52269	59161	203809	53468
Sichuan	23	2010	5.0073	0.132925	0.7	3230	0.244937	5525.55	0.655617	0.041	0.01156	0.0549277	9255.29	5086.9	15461.2	8044.92	0.4018	3232.45	4812.47	19980	37984	28577	39844	24036	29046	36496	22262	42615	52854	29995	34221	53854	20555	24029	34408	39209	32101	35015	50291	204116	1242032	152647	999073	171332	230645	54698	63230	213085	54011
Sichuan	23	2011	5.2835	0.105951	0.7	3350	0.379503	5884.25	0.731653	0.041	0.011677	0.0547398	11052.2	6128.6	17899.1	8050	0.4183	3367.32	4682.68	26476	42399	33210	45953	27500	33453	43533	26691	46954	61242	35298	38967	63235	24661	29688	39139	45922	36944	39555	45620	213090	1416225	162750	1118038	178479	225911	61348	64655	214458	64730
Sichuan	23	2012	5.585	0.061255	0.7	3590	0.550234	6096.78	0.809982	0.041	0.012258	0.0570124	12793.3	7001.4	20307	8076.2	0.4353	3515.57	4560.63	31430	46812	36243	50484	31939	38334	53841	28397	56506	69846	41813	47518	67113	28701	32815	44443	53451	43665	44117	40286	244752	1444877	176251	1160870	184898	235581	76382	59859	229727	65708
Sichuan	23	2013	5.7213	0.108046	0.7	4070	0.582435	6269.55	0.884963	0.041	0.012705	0.059342	14393.4	7895.3	22367.6	8107	0.449	3640.04	4466.96	34437	51485	44259	66679	37421	41814	58276	30613	69552	76687	45758	48724	76610	33646	36253	49234	59159	47138	48635	37407	231977	2045781	271619	1.77836e+06	332283	393912	124573	156216	241172	157346
Sichuan	23	2014	5.5078	0.134566	0.8	4300	0.596251	6434.19	0.951692	0.042	0.013145	0.06182	16240.2	9347.7	24234.4	8140.2	0.463	3768.91	4371.29	39358	59959	48770	74929	41132	46215	60631	33378	77268	84601	49713	49288	80634	36887	39203	52357	63188	51728	52062	32317	235147	1754253	267016	1555581	323151	413341	115124	162872	242150	176850
Sichuan	23	2015	5.1846	0.090139	0.8	4630	0.60451	6543.42	1.02634	0.041	0.013286	0.0641469	17857.7	10247.4	26205.3	8204	0.4769	3912.49	4291.51	47729	61715	52110	79732	45255	50188	65981	36807	82883	86084	53610	52818	86498	40665	44212	63311	73704	58860	63704	29007	195542	1596566	261437	1538576	308947	407058	105604	182515	258694	186265
Sichuan	23	2016	5.1853	0.101207	0.8	4840	0.630598	6733.24	1.01693	0.042	0.013193	0.0664834	19633.9	11203.1	28335.3	8262	0.4921	4065.73	4196.27	52813	64895	56439	86951	48088	51824	69490	38381	88800	87119	59135	55754	91309	44041	47806	69737	82150	64885	71074	28280	185898	1.4833e+06	231708	1514775	305054	404335	96916	184098	303938	198387
Sichuan	23	2017	5.1999	0.08269	0.8	5180	0.651638	6855.01	1.08197	0.04	0.013129	0.0689765	21623	12226.9	30726.9	8302	0.5079	4216.59	4085.41	59159	76135	60149	90113	49461	56788	76738	40539	95805	91529	59954	60467	101514	48945	47591	75988	89706	71769	79636	24949	170163	1472818	221100	1.45523e+06	302422	389107	93406	201350	316956	215380
Sichuan	23	2018	5.2554	0.160478	0.792976	5750	0.691296	6896.55	1.1569	0.035	0.014267	0.0717135	23729	13331.4	33215.9	8341	0.5229	4361.51	3979.49	65412	94172	69810	99110	55134	66831	85101	43904	110548	96629	65676	59053	124631	55119	49167	83030	98306	80152	90039	21352	134995	1272929	223864	1.60386e+06	275170	373905	95603	193338	323970	218961
Sichuan	23	2019	5.1191	0.119611	0.8	5130	0.724669	7000.42	1.20987	0.033	0.015045	0.0723622	26226.1	14670.1	36153.7	8375	0.5379	4504.91	3870.09	64875	103207	73407	108932	59331	72470	98084	47076	125696	94818	72432	57667	133828	62968	52735	90160	109055	86139	95421	14285	128733	1238169	209088	1516530	281296	319899	125106	200094	326992	251557
Guizhou	24	2003	1.5965	0.110635	0.613572	543	0.043411	2574.09	0.264858	0.04	0.008786	0.0506798	2848.79	1564.7	6569.2	3870	0.256587	992.991	2877.01	8263	11556	10291	18801	8942	8630	13280	8581	18426	16121	10396	11884	14090	8724	8455	10597	12120	11437	11472	44030	89981	424431	59656	186229	116640	99557	24494	11023	48769	25058
Guizhou	24	2004	1.507	0.095266	0.63555	717	0.044826	2620.91	0.27685	0.041	0.008709	0.0506451	3243.88	1721.55	7518.72	3904	0.262598	1025.18	2878.82	9245	14231	11552	22243	10307	9256	16181	9854	17399	21081	9503	11879	14999	9688	9729	11720	13210	11412	12521	44122	91960	425781	61420	194729	123474	88459	23655	21605	49158	29851
Guizhou	24	2005	2.2235	0.118899	0.653664	885	0.04933	2664.38	0.371002	0.042	0.009115	0.0517738	3562.85	1877	8151.1	3730	0.2687	1002.25	2727.75	10450	17175	13471	26326	11152	10209	17812	9982	23228	25051	9770	13676	18086	12040	9055	13957	14575	12975	14202	29618	108624	417190	65367	238522	120644	87371	27455	16410	48666	38240
Guizhou	24	2006	2.3731	0.163232	0.668054	1060	0.052374	6436.25	0.450924	0.041	0.009756	0.0529686	3943.05	1984.6	9116.6	3690	0.2746	1013.27	2676.73	12361	18067	15734	29359	12008	13131	19975	9672	22464	28612	11980	15626	20308	12781	10484	16316	18346	17954	17469	29573	106983	410642	65850	227361	119898	84881	28279	14741	49921	39365
Guizhou	24	2007	2.7819	0.140408	0.673406	1570	0.056718	7002.67	0.541759	0.04	0.010187	0.0535399	4719.16	2374	10678.4	3632	0.2824	1025.68	2606.32	15274	20367	17918	35814	14531	15595	21657	11122	29653	38124	13924	17605	23656	14774	15228	21693	22867	21206	22711	27494	108144	424536	66091	234271	117537	85958	27109	20689	53176	45394
Guizhou	24	2008	3.1564	0.111827	0.685634	2060	0.060067	7123.01	0.603329	0.04	0.010289	0.0538729	5405.71	2796.9	11758.8	3595.98	0.2911	1046.79	2549.19	16890	24487	22224	42457	16899	22698	26288	12784	34275	48292	15552	19970	25942	16074	13591	23546	25575	24699	25787	27369	108270	376133	69842	217414	97988	90089	23360	24686	56765	32193
Guizhou	24	2009	3.7511	0.067784	0.701919	2600	0.066614	8100.06	0.647635	0.038	0.013288	0.054011	5951.69	3005.4	12862.5	3537	0.2989	1057.21	2479.79	17249	27280	25284	40570	22744	24081	28652	17054	36015	53780	21959	20718	28087	16895	21268	28310	27370	24332	28421	19753	115399	373132	66018	220156	99619	91411	26693	23822	59365	36979
Guizhou	24	2010	4.2223	0.120653	0.708574	3160	0.138316	8616.14	0.751276	0.036	0.01351	0.0533229	7079.7	3471.9	14142.7	3479	0.3381	1176.25	2302.75	18175	32779	29381	47822	25437	27776	32106	18935	37097	61474	22997	22036	29670	20737	21966	30466	29993	24531	29537	20905	118050	369420	69803	232870	102978	94925	25655	27144	64278	38581
Guizhou	24	2011	5.5489	0.130837	0.701465	4320	0.326261	8967.05	0.820392	0.036	0.013837	0.0525701	8462.82	4145.4	16495	3469	0.3496	1212.76	2256.24	23923	40914	35200	53096	32384	34528	37864	23211	45841	75169	28038	26900	34906	25628	26772	34678	33803	29999	33992	18663	135445	398782	83107	282707	106332	96691	29414	26787	71546	42834
Guizhou	24	2012	6.1312	0.09568	0.71924	4880	0.450651	9348.98	0.950883	0.033	0.014064	0.053782	9831.28	4753	18700.5	3484.07	0.3641	1268.55	2215.52	30850	43113	36187	59344	36560	40325	47049	25372	53384	81630	33617	30121	39087	27779	28224	42432	44289	35937	40549	16169	181719	476220	84348	348660	131690	91459	39394	24640	73829	54316
Guizhou	24	2013	6.2586	0.117471	0.753154	5140	0.520955	9804.77	1.02924	0.033	0.014848	0.0547955	11196.7	5434	20667.1	3502.22	0.3783	1324.89	2177.33	33490	45308	43368	64270	42874	44489	52524	29760	64260	102294	39683	35696	45749	27832	28437	47235	53103	43319	45226	15760	184167	463646	134952	394542	139627	113449	41181	33507	80420	68690
Guizhou	24	2014	6.4626	0.075148	0.770282	5990	0.555324	10174.9	1.16818	0.033	0.015678	0.0555505	13023.6	6671.2	22548.2	3508.04	0.4001	1403.57	2104.47	38853	50309	47607	68675	45227	49886	58617	34416	75068	118477	44867	46156	57290	31706	34214	52713	59142	48944	50699	15331	175868	440823	129544	428082	139440	110875	38936	32921	83538	78813
Guizhou	24	2015	6.3936	0.05277	0.787696	6520	0.578297	10591.3	1.25809	0.033	0.016716	0.0574111	14609.6	7386.9	24579.6	3529.5	0.4201	1482.74	2046.76	47704	49503	52027	72900	47832	57576	65506	37208	80955	123592	48331	48290	64338	36336	35528	64268	67511	57257	61370	11478	154672	424960	128112	428178	123903	116431	29014	32588	86467	87494
Guizhou	24	2016	6.2861	0.025918	0.799612	7310	0.597975	10887.8	1.36557	0.032	0.018003	0.0614172	16325.3	8090.3	26742.6	3555	0.4415	1569.53	1985.47	53874	49909	58288	81297	53487	60617	70936	40505	79355	132964	53467	50522	72107	40230	38246	72580	73553	67427	70060	10863	134127	401975	122146	457131	123912	119890	27738	35983	90315	87896
Guizhou	24	2017	6.276	0.074806	0.817239	7540	0.652709	11044.3	1.45534	0.032	0.019553	0.0633939	18170.1	8869.1	29079.8	3580	0.4602	1647.52	1932.48	58198	56586	61456	93136	56266	63243	75439	40267	91063	141959	54318	52910	79826	46697	38568	79815	82248	75629	77318	10242	129692	391242	90799	452285	127350	121651	29272	38037	91727	95552
Guizhou	24	2018	6.2248	0.074872	0.8	8330	0.678472	11632	1.54054	0.032	0.02	0.0660831	20111.5	9716.1	31591.9	3600	0.4752	1710.72	1889.28	52067	63943	74072	102967	62684	71507	86100	43862	108388	143411	62988	56455	87726	45840	43654	84484	86763	87154	79464	7733	113662	315439	91331	450687	119591	118800	25981	34704	88311	86418
Guizhou	24	2019	6.6593	0.105205	0.820622	7730	0.699237	11632	1.60408	0.031	0.019873	0.0686432	22348.5	10756.3	34404.2	3622.95	0.4902	1775.97	1846.98	50757	71133	80284	110790	72739	79656	91525	45082	104948	132008	64267	63973	95520	50574	46821	87861	91883	86338	79535	7120	117717	295720	94512	433561	111028	131662	27911	39940	145226	106758
Yunnan	25	2003	2.5583	0.108073	0.439789	777	0.058807	4334.31	0.482933	0.041	0.00777	0.0591604	3301.87	1697.1	7643.6	4376	0.269868	1180.94	3195.06	9212	10861	12645	18490	10475	11068	13810	8793	19343	15133	12694	14861	14827	10848	10954	13391	15094	13284	13191	175983	58696	469231	70722	173378	154579	145805	42280	31005	71466	16777
Yunnan	25	2004	2.4145	0.104445	0.505412	906	0.057826	4359.51	0.507447	0.043	0.00974	0.0597904	4032.57	1864.19	9546.29	4415	0.282264	1246.2	3168.8	9575	13318	14898	20858	11491	13287	16575	9361	21855	20103	13789	18985	16884	11580	11008	14613	16219	13844	14381	165677	55219	453934	66949	159704	130058	130757	38517	32334	71833	18298
Yunnan	25	2005	2.8014	0.11779	0.563718	98	0.058135	5074.35	0.531038	0.042	0.009888	0.061685	4172.91	2041.8	9265.9	4450	0.295	1312.75	3137.25	10513	15763	17166	26741	13316	15761	19096	10309	26434	23900	13301	19226	18901	11873	11521	15239	16731	14570	15040	162972	60467	445382	69861	185090	113828	131483	38580	29449	70608	20065
Yunnan	25	2006	2.9135	0.102514	0.561114	1140	0.059652	5178.71	0.563279	0.043	0.011153	0.0623396	4635.42	2250.5	10069.9	4483	0.305	1367.32	3115.68	12219	18387	18837	29105	13662	17514	22443	11030	26580	27792	14142	18642	20422	12778	12380	18344	19464	16427	17800	161899	72982	462394	70378	201190	115792	129355	43492	33313	72094	22369
Yunnan	25	2007	3.2988	0.142963	0.552962	1530	0.061896	5226.53	0.603062	0.042	0.011298	0.0638446	5434.49	2634.1	11496.1	4514	0.316	1426.42	3087.58	13088	18755	20028	32832	14098	17869	25691	11371	29288	35352	15805	16651	23564	13873	12927	20674	21103	18866	21143	165548	128649	561305	76298	325729	139214	124830	58284	37425	74515	30931
Yunnan	25	2008	3.5168	0.114089	0.641857	1870	0.064653	5316.98	0.661671	0.042	0.012987	0.0644022	6451.31	3102.6	13250.2	4543	0.33	1499.19	3043.81	13537	23629	22681	37459	16081	22185	30067	13380	32603	42672	17896	21306	26264	15375	16459	22484	23236	20164	27478	142975	115233	565778	79597	360089	139040	136562	58051	38072	84059	33063
Yunnan	25	2009	4.0474	0.128385	0.682445	2410	0.067062	5375.11	0.715645	0.043	0.013345	0.0649223	7127.86	3369.3	14423.9	4571	0.34	1554.14	3016.86	15011	23725	23614	40101	17629	23488	31714	14853	36687	52773	20612	22049	30110	16339	17035	29197	24484	22377	30310	85068	145514	608339	79561	362867	146872	142520	58639	40521	88466	36616
Yunnan	25	2010	4.3818	0.11067	0.704782	2830	0.171006	5458.65	0.802371	0.042	0.013256	0.0651075	8155.04	3952	16064.5	4601.6	0.347	1596.76	3004.84	15922	27175	28550	44110	21002	26268	35897	16030	37346	60775	22236	23969	34588	17788	18340	32301	28988	24834	31650	144926	151612	588358	84928	376134	155697	134067	58115	35102	90275	41347
Yunnan	25	2011	5.2845	0.198651	0.721635	3670	0.349665	5596.77	0.897911	0.041	0.01382	0.0649705	9820.12	4722	18575.6	4631	0.368	1704.21	2926.79	19612	33926	32923	48055	25233	31423	44111	19476	42088	76946	28992	27481	42284	23632	22660	36318	35618	32058	34402	110142	184063	632443	94887	481151	193644	135889	73795	40738	97341	53681
Yunnan	25	2012	5.8845	0.168986	0.732046	4510	0.529642	5716.15	1.01643	0.04	0.014166	0.0640842	11571.7	5416.5	21074.5	4659	0.3931	1831.45	2827.55	21232	38526	36574	53087	28354	34154	50069	23297	48332	88699	33562	33950	43722	26788	26146	39983	41801	35997	37580	91999	222721	705302	97205	664383	235155	135612	85081	43075	98463	72810
Yunnan	25	2013	6.2223	0.181025	0.760962	4690	0.541331	5816.33	1.10057	0.04	0.014296	0.0641217	13061	6141.3	23235.5	4686.6	0.4048	1897.14	2789.46	24290	41997	40659	64083	32598	38441	53775	26571	56193	104144	38864	35425	48879	30608	30000	45448	46400	41914	42351	71087	229195	739954	103013	736778	255150	167968	95535	66460	98997	100707
Yunnan	25	2014	6.1644	0.11219	0.769381	5300	0.542735	6010.91	1.17046	0.04	0.014213	0.064406	14484.6	7456.1	24299	4713.9	0.4173	1967.11	2746.79	25457	42322	43160	69160	36229	42507	59701	28741	62746	110235	43732	37356	53229	32949	32696	49291	50784	46209	45221	66798	173411	720798	103127	676077	259611	171080	86955	52474	101059	111260
Yunnan	25	2015	5.7458	0.074891	0.765831	5270	0.562276	6157.24	1.24033	0.04	0.014551	0.0657769	16098.3	8242.1	26373.2	4741.8	0.4333	2054.62	2687.18	29794	43101	45903	73588	38557	46063	66450	31429	72496	118166	46064	41225	64270	38911	37319	62263	59543	56135	56413	65426	152778	674528	105971	680247	250372	171272	84253	48898	99499	109252
Yunnan	25	2016	5.5311	0.074654	0.780457	5660	0.595116	6211.84	1.31167	0.036	0.015091	0.0668566	17841.5	9019.8	28610.6	4771	0.4503	2148.38	2622.62	36939	45182	49643	78234	41945	49611	72296	33832	75240	121529	49441	43305	73883	46529	38581	76918	71550	63017	74017	62772	135973	662611	106896	716871	247961	173100	81924	49974	103574	112214
Yunnan	25	2017	5.7634	0.128863	0.79428	6250	0.593771	6327.84	1.38132	0.032	0.01604	0.0678219	19729.5	9862.2	30995.9	4800.5	0.4669	2241.35	2559.15	45363	50066	54032	86354	43966	56150	80853	36430	80497	130774	50873	45247	84202	53368	39920	93600	82232	76032	90916	57683	122880	645006	103266	737167	233792	178598	81109	52120	104727	123679
Yunnan	25	2018	5.6412	0.074054	0.811452	6630	0.616398	6846.05	1.06872	0.034	0.016356	0.0683899	21630.3	10767.9	33487.9	4830	0.4781	2309.22	2520.78	47647	59328	61857	94601	49128	59625	89006	39206	85135	137046	55289	47061	94132	55583	46139	101239	87406	83405	98123	47370	115121	626772	103286	738505	236486	171192	80438	48813	105403	139036
Yunnan	25	2019	5.7497	0.143776	0.791092	6180	0.629868	6846.05	1.09349	0.033	0.016674	0.0687343	23804.8	11902.4	36237.7	4858	0.4891	2376.05	2481.95	38748	70534	75585	102867	59815	74293	100869	43571	92629	137161	65138	55920	104725	56631	43858	98360	94059	85090	97777	35203	66380	421395	120762	389169	158138	162998	54402	53321	118991	103781
Shaanxi	26	2003	2.32	0.127705	0.47767	654	0.098696	2432.83	0.516568	0.035	0.015523	0.0496716	3484.82	1675.7	6806.4	3672	0.352607	1294.77	2377.23	8177	12534	10281	16218	9926	7290	14506	7654	26772	17032	10931	9853	14977	9528	9076	12598	11129	11067	11030	65538	173366	885985	84538	203811	212439	204219	46894	28978	98457	15243
Shaanxi	26	2004	2.2037	0.093274	0.486434	924	0.100326	2564.2	0.556876	0.038	0.016843	0.048896	4104.94	1866.52	8043.23	3681	0.362396	1333.98	2347.02	8713	16195	11894	18265	11071	8506	16647	8618	30085	19832	13048	11055	16596	10327	9922	13634	12259	12815	12070	65976	176618	858637	88207	215177	208323	202439	43949	28852	97995	19204
Shaanxi	26	2005	3.2753	0.135634	0.512059	1060	0.101931	2650.39	0.607025	0.042	0.019512	0.0486594	4368.08	2052.6	8272	3690	0.3723	1373.79	2316.21	10218	19912	13422	20906	11418	9452	18595	9366	33726	23128	13956	12080	20053	11099	11263	15310	14495	13429	13351	64234	182432	861828	92411	195797	200041	204452	47684	35112	99466	23976
Shaanxi	26	2006	3.6035	0.230055	0.522282	1270	0.105845	5510.85	0.644774	0.04	0.020546	0.0491619	5001.53	2260.2	9267.7	3699	0.3912	1447.05	2251.95	11016	24325	15825	22539	12570	11137	17958	9974	36618	24411	17229	14665	23486	11581	12820	16897	16187	14846	14343	64701	195493	843496	96661	204395	182666	197233	50721	33342	99762	25838
Shaanxi	26	2007	3.9869	0.066557	0.567613	1700	0.110059	5899.66	0.715775	0.04	0.020496	0.0516528	5942.48	2644.7	10763.3	3708	0.4062	1506.19	2201.81	13551	28990	17968	27417	14859	12731	23725	13390	42204	31335	26622	16982	30413	14475	21457	23089	21119	17001	19914	62605	240394	853912	99586	204514	181545	198350	48195	34940	101021	26527
Shaanxi	26	2008	4.3744	0.089017	0.581583	2210	0.116568	6373.44	0.794343	0.039	0.020441	0.0551504	7229.21	3136.5	12857.9	3718	0.421	1565.28	2152.72	16985	33305	20910	32949	16844	15183	28960	16123	50657	39246	31592	20330	36815	19559	25160	29860	26016	21079	24980	63719	237434	850642	100806	206314	181945	195621	48021	37137	105675	29514
Shaanxi	26	2009	4.8752	0.079385	0.607874	2680	0.123112	7009.19	0.870472	0.039	0.02066	0.0562123	8088.27	3437.6	14128.8	3727	0.435	1621.24	2105.76	20670	36289	23428	35388	22822	20034	31265	16338	38628	46122	32639	27595	39550	21832	23506	35063	30961	27119	30506	41484	232030	821814	99729	240787	122736	192057	56946	61895	128648	45090
Shaanxi	26	2010	5.3578	0.085654	0.637536	2950	0.26506	7172.23	0.987233	0.039	0.020884	0.0564413	9408.68	4105	15695.2	3735	0.4576	1709.14	2025.86	23934	42417	26015	39677	25357	23836	35846	18171	42498	48138	37842	28327	48734	23514	26147	39785	34809	29724	33224	43633	246629	810080	110181	252309	124128	191082	63084	70856	141411	51443
Shaanxi	26	2011	6.6656	0.044892	0.647606	4270	0.498557	7392.31	1.10668	0.036	0.020839	0.0572079	11279.7	5027.9	18245.2	3743	0.473	1770.44	1972.56	28159	52368	33385	47667	28993	27794	41233	21626	43008	53289	31770	30804	56784	26283	24562	42176	40075	33425	37033	42404	289171	851291	96576	346119	149298	196734	74107	77179	140494	62935
Shaanxi	26	2012	7.0603	0.057768	0.623853	4530	0.625899	7850.73	1.25294	0.032	0.02105	0.0597093	13251.2	5762.5	20733.9	3753	0.5002	1877.25	1875.75	32557	57556	37833	54069	34033	33043	45982	25006	56137	57997	35213	35737	60394	30802	26762	47596	46380	38995	42698	36369	299886	862145	95723	428073	178351	183423	74893	78126	146178	66265
Shaanxi	26	2013	6.9275	0.059238	0.699501	4520	0.634936	8037.4	1.33847	0.033	0.021254	0.0633205	14894.8	6502.6	22858.4	3764	0.5131	1931.31	1832.69	36800	69904	42072	56935	39375	34561	50410	27587	69266	71987	41317	47752	65546	35276	32047	50826	50090	46364	44868	26097	363122	1079059	122036	721432	259513	250381	125634	94705	150381	87012
Shaanxi	26	2014	6.8019	0.076821	0.717566	5300	0.642973	8129.62	1.42532	0.033	0.021191	0.0668873	16571.3	7932.2	24365.8	3775.12	0.5257	1984.58	1790.54	38418	69920	46636	62907	43454	37709	57904	28929	91423	74340	43865	43471	63478	36846	32890	51856	49447	47853	44915	23587	360986	1061298	126775	709790	263715	287338	117718	103733	160669	106751
Shaanxi	26	2015	6.7929	0.061413	0.751042	5540	0.650198	8271.84	1.52606	0.034	0.021091	0.0709115	18249.6	8688.9	26420.2	3793	0.5392	2045.19	1747.81	43678	68245	51557	67945	46184	40983	63194	31506	104928	76896	47517	49740	67134	40081	36733	57225	55203	52918	50868	22313	353696	1044393	136672	643716	258011	279930	110675	102252	180004	111196
Shaanxi	26	2016	6.2499	0.040738	0.761194	5510	0.658615	8388.67	1.27548	0.033	0.021243	0.0733878	19935.2	9396.4	28440.1	3813	0.5534	2110.11	1702.89	48185	73995	54348	71640	50797	43208	65955	34293	121311	82626	51205	50797	72786	41151	38405	62813	61509	55946	55589	23905	349466	1019902	136706	611293	257810	283123	105890	111536	203485	114716
Shaanxi	26	2017	6.2761	0.10163	0.781338	7040	0.700678	8482.25	1.35357	0.033	0.021121	0.0757249	21932.5	10264.5	30810.3	3835	0.5679	2177.9	1657.1	50301	78103	59941	77998	54833	48791	72962	36703	130891	86024	51772	48969	79714	43375	38342	69575	66995	57597	62485	22314	347153	1002236	127576	603581	266355	279550	101078	115752	224008	117534
Shaanxi	26	2018	6.2987	0.09565	0.854839	6470	0.707479	8758.27	1.42893	0.032	0.024586	0.0794478	24063.3	11212.8	33319.3	3864	0.5813	2246.14	1617.86	53301	91512	66489	96748	58710	54357	81571	38556	135541	86335	58330	51747	94877	45479	48480	75909	74814	60860	67603	17657	337945	917743	121519	611984	227171	272829	95735	127107	216191	118577
Shaanxi	26	2019	6.1718	0.064208	0.86	5930	0.734326	8758.27	1.4826	0.032	0.024508	0.0840382	26453.7	12325.7	36098.2	3876.21	0.5943	2303.63	1572.58	62010	100597	72846	105701	64735	59383	89883	41146	152088	92560	64840	58692	98029	50203	52337	78636	80942	65406	73127	13471	338186	803849	135027	586876	226534	271497	92580	133833	277888	138234
Gansu	27	2003	2.4385	0.087035	0.428464	828	0.07568	886.73	0.682825	0.034	0.012219	0.0509448	3046.42	1673.1	6657.2	2537	0.275541	699.047	1837.95	8874	12205	11635	17544	9303	7397	14843	7461	13104	13991	11178	10345	14470	11678	10629	13534	13859	12789	13677	86691	78225	480550	71398	156288	94514	125303	19137	19955	52708	12521
Gansu	27	2004	2.3183	0.082966	0.455673	1100	0.076551	896.809	0.729866	0.034	0.0122	0.0509559	3618.33	1852.22	7990.65	2541	0.287713	731.079	1809.92	9406	14727	13383	19786	9899	8222	16614	8412	13672	16292	9078	11692	15930	12289	10360	14481	14517	13640	14870	88545	78600	474652	70614	148852	85845	123754	24022	21325	56272	10113
Gansu	27	2005	3.085	0.069354	0.500206	1220	0.077528	909.551	0.79001	0.033	0.012967	0.0514459	3813.19	1979.9	8086.8	2545	0.3002	764.009	1780.99	9857	17656	14930	21398	9735	8731	17467	8398	16103	17950	11282	11149	18496	13235	10766	15983	15496	15147	16196	84096	93758	441574	68257	137613	84892	117049	24967	22068	58859	11487
Gansu	27	2006	3.2812	0.095252	0.573965	1530	0.078995	2104.8	0.835262	0.036	0.012956	0.0531708	4244.02	2134.1	8920.6	2547	0.3109	791.862	1755.14	10867	20573	16929	22326	10526	10729	22655	11120	15999	19343	12182	12366	20167	13444	20252	18545	17322	16767	17587	65568	130108	431808	67837	144421	75385	110463	21543	17037	58394	14846
Gansu	27	2007	3.5808	0.122187	0.588822	2000	0.081808	2214.17	0.904717	0.033	0.013344	0.0553489	4756.09	2328.9	10012.3	2548	0.3159	804.913	1743.09	13117	26626	21182	27022	13102	12816	25268	12079	18818	24671	13562	14234	23397	16584	17934	22379	19983	20248	21406	58585	111160	397645	68003	145043	71291	98950	21462	16915	63006	19343
Gansu	27	2008	4.3251	0.099796	0.622769	2900	0.086637	2324.78	0.974132	0.032	0.013329	0.0574587	5374.76	2723.8	10969.4	2550.88	0.3215	820.108	1730.77	14400	34354	24895	30370	13445	15312	27913	13961	19940	27511	14910	16682	26746	19491	21719	24897	23022	22676	25053	58988	85764	369429	65212	163133	60310	102223	19582	15450	66859	14429
Gansu	27	2009	4.7579	0.08679	0.624178	3440	0.090379	2508.8	1.05943	0.033	0.013308	0.0577971	5902.18	2980.1	11929.8	2554.91	0.3265	834.178	1720.73	16872	42760	25936	32685	16423	16813	30916	15163	22186	30627	17985	19705	30173	21603	19559	28608	26931	26946	27945	52687	88126	386117	67351	140510	55500	103072	19951	22355	66131	17113
Gansu	27	2010	5.0903	0.064967	0.644313	3910	0.167189	2616.18	1.20928	0.032	0.013672	0.0579883	6951.42	3424.7	13188.6	2559.98	0.3612	924.665	1635.32	19735	43258	28173	37624	20836	20563	30928	17588	24896	35311	22936	21608	34730	23186	21384	29725	28881	28769	30227	52776	91018	352602	68085	153922	56547	101369	18889	17716	68059	17277
Gansu	27	2011	5.8302	0.090909	0.651711	5070	0.40738	2722.18	1.3254	0.031	0.01443	0.0587336	8025.36	3909.4	14988.7	2564.19	0.3715	952.597	1611.59	20409	54103	36312	35797	25334	23676	37272	19653	25181	38163	26660	23143	34475	24072	22916	31635	28579	28503	29806	52197	96916	338608	70493	190546	56003	103980	18577	18043	69015	16364
Gansu	27	2012	6.1439	0.082919	0.661708	5820	0.564102	2887.35	1.44361	0.027	0.014355	0.0608637	9408.65	4506.7	17156.9	2577.55	0.3875	998.801	1578.75	24971	59549	41815	41118	33312	27122	43603	22865	33062	44437	31397	28884	41814	28195	24604	37631	35730	35478	34481	55471	96645	338144	72169	229867	60073	103610	19290	20373	71862	18849
Gansu	27	2013	6.3164	0.099657	0.690973	6200	0.591322	2940.07	1.56409	0.023	0.014329	0.0637141	10668.6	5107.8	18964.8	2582.18	0.4013	1036.23	1545.95	29317	57788	46152	57778	34793	33083	51229	26817	39962	48791	37381	27057	49957	33119	27199	46495	43061	39989	41848	52254	105772	391870	100410	460595	76774	126629	35232	30607	72118	38869
Gansu	27	2014	6.3169	0.079985	0.695809	6950	0.59403	3038.82	1.68484	0.022	0.014667	0.0668689	12748.4	6276.6	21803.9	2590.78	0.4168	1079.84	1510.94	31950	64881	49442	58916	37176	35765	56236	29387	45628	52334	40045	39915	58166	37544	32779	51241	45518	46981	45870	50176	126048	374693	129246	456938	81849	124382	33622	27561	72280	44845
Gansu	27	2015	6.5434	0.037159	0.710905	7690	0.593526	3082.13	1.81808	0.021	0.015387	0.0711257	14205.5	6936.2	23767.1	2599.55	0.4319	1122.75	1476.8	37179	63590	50458	63245	40551	39109	61318	32698	54916	59923	44302	44895	67352	45312	41777	61396	56180	55246	55574	49721	118592	356230	120637	438157	81736	125717	33416	27300	74747	44879
Gansu	27	2016	6.3658	0.040862	0.721206	7660	0.601034	3125.57	1.31893	0.022	0.016858	0.0747436	15606.8	7456.9	25693.5	2610	0.4469	1166.41	1443.59	40179	64807	53130	64084	43683	41464	64177	34914	60292	60252	46724	47145	75114	50595	38823	69690	61593	58837	63535	49634	106657	335818	121906	436959	81249	127973	32314	27494	76216	51748
Gansu	27	2017	6.0966	0.020743	0.736523	8380	0.644402	3130.55	1.43415	0.027	0.016756	0.0786203	17209	8076.1	27763.4	2626	0.4639	1218.2	1407.8	47073	76002	59132	67961	47590	44523	70222	37114	67912	63050	48071	46416	85197	52385	44184	76850	68487	63705	69136	42172	92149	315050	125533	405211	77425	133029	31654	28994	84387	52697
Gansu	27	2018	6.2764	0.039514	0.767765	9480	0.671862	3152.02	1.52441	0.028	0.016686	0.0832506	18891.9	8804.1	29957	2637	0.4769	1257.59	1379.41	47010	84148	68310	77781	51863	51200	81723	38162	75412	72637	50407	59299	94087	54623	57058	83981	74842	69608	74866	39851	83794	291478	120490	355949	69900	145818	26607	29766	76886	45306
Gansu	27	2019	6.0053	0.04835	0.74912	8310	0.695731	3332.81	1.59421	0.03	0.01662	0.0870523	20633.5	9628.9	32323.4	2647.43	0.4849	1283.74	1363.69	51011	85432	73138	83511	54097	55159	84638	40319	80909	78914	49226	50130	99718	55910	44366	86761	76480	68623	76736	19804	76683	281307	113119	345873	78385	131580	28030	37413	95629	54447
Qinghai	28	2003	4.7929	0.113139	0.60471	1780	0.105805	337.491	0.874755	0.038	0.016854	0.0667414	3650.26	1794.1	6745.3	534	0.374892	200.192	333.808	10577	14930	12193	21364	10694	9986	18227	11811	24594	19235	14024	12874	21917	10930	13188	16473	17172	15071	16971	22930	18713	68410	17277	29407	18138	29067	5216	7029	15034	1648
Qinghai	28	2004	4.5215	0.10429	0.629197	2410	0.10857	388.467	0.981312	0.0392	0.016698	0.0641106	4193.39	1957.65	7785.09	539	0.383658	206.791	332.209	12012	18173	12991	24040	12275	10021	18016	12214	27423	22366	12978	12394	26637	13756	14705	18657	19013	17533	18742	22520	17948	67430	17424	28486	17083	34636	4156	7295	14294	1256
Qinghai	28	2005	6.36	0.111832	0.664287	2760	0.110497	411.45	0.991292	0.039	0.014733	0.0653759	4469.76	2151.5	8057.9	543	0.3925	213.127	329.873	11558	18476	14638	25145	15803	13142	21144	14906	29595	23940	11660	12167	31185	14599	31780	19898	20660	20124	20477	22621	15848	66764	17388	29133	16551	33910	4461	7857	14021	1979
Qinghai	28	2006	6.9379	0.035621	0.678761	3280	0.114051	660.75	1.00644	0.039	0.014599	0.0675541	4966.05	2358.4	9000.4	548	0.3926	215.145	332.855	15332	24021	17184	27047	16291	13850	24278	13133	29897	25721	12712	17468	35029	15386	48111	24173	23810	23073	23544	22939	16769	67114	17395	29006	15476	32957	4116	8064	14530	1975
Qinghai	28	2007	7.5085	0.075819	0.68956	4350	0.118116	728.575	1.05497	0.0375	0.014493	0.0676019	5726.03	2683.8	10276.1	552	0.4007	221.186	330.814	18747	27600	19923	28286	15811	15257	29132	12744	26777	29131	14924	22210	40976	18481	26884	30464	27329	28782	28795	22247	16124	71291	19055	34879	14635	33065	3970	8715	15269	2729
Qinghai	28	2008	8.2272	0.081085	0.694968	5590	0.123223	784.189	1.08598	0.038	0.014433	0.0694932	6566.66	3061.2	11640.4	554.3	0.4086	226.487	327.813	21849	33732	23742	35955	18529	19153	33827	14389	31454	36723	24131	18651	44408	21134	45740	36426	32695	31526	34068	23193	17850	79513	14281	35131	15859	32239	3801	8225	16240	5870
Qinghai	28	2009	9.6568	0.171104	0.69348	7180	0.12801	832.563	1.20139	0.038	0.016149	0.0697403	7262.05	3346.2	12691.9	557.3	0.419	233.509	323.791	24022	34890	23671	39404	24062	21175	37319	16825	35417	37456	22716	35718	45158	23562	30093	38821	35089	36700	37760	19786	19303	87203	13043	39972	18049	32761	4771	8210	18156	6812
Qinghai	28	2010	12.46	0.079869	0.70625	10600	0.247573	860.93	1.35158	0.038	0.015972	0.0700924	8331.26	3862.7	13855	563.47	0.4472	251.984	311.486	26020	40320	28459	44721	26423	24898	43523	18574	41668	41641	21948	42784	48822	25591	32969	42447	37126	38694	40648	17453	20022	97600	12350	40593	17408	32740	4749	7827	19648	6322
Qinghai	28	2011	14.835	0.111461	0.658288	14300	0.460954	889.935	1.41052	0.038	0.01584	0.0720412	9690.3	4608.5	15603.3	568.17	0.4622	262.608	305.562	30407	45311	35208	45168	32352	30059	50252	21874	47356	54446	26309	46007	55466	31582	35573	49848	41696	42506	46408	17909	26027	120868	14535	66314	22652	34290	7632	8844	20035	9530
Qinghai	28	2012	15.5201	0.122	0.65839	14700	0.509622	913.582	1.44394	0.034	0.015702	0.0724494	11153	5364.4	17566.3	573.17	0.4744	271.912	301.258	29087	54731	42633	59026	38019	35273	57690	27613	54819	59574	33489	59427	60957	33091	38722	51359	43126	45084	47443	15669	25860	116883	19845	73524	23542	34008	6789	9275	21912	7536
Qinghai	28	2013	14.8855	0.043708	0.744876	14900	0.530296	970.746	1.38149	0.033	0.015577	0.0733403	12649.2	6196.4	19498.5	577.79	0.4851	280.286	297.504	32204	72764	45090	63403	40242	40200	60428	31724	49989	67182	32456	30685	59097	39286	27848	57705	48976	49730	54414	14207	44155	118359	18548	73223	23644	47567	6058	10001	21601	8252
Qinghai	28	2014	14.6825	0.050468	0.759784	15900	0.547119	1006.55	1.50481	0.032	0.020568	0.070485	14761.6	7282.7	22306.6	583.42	0.4978	290.426	292.994	35634	80349	51124	66310	45305	41917	66580	35311	60662	77354	36842	36173	61650	44601	33526	63981	55752	55759	59498	13700	42065	112628	18887	75510	23220	40890	5977	9330	22377	7831
Qinghai	28	2015	14.5465	0.040034	0.771521	16500	0.566762	1046.56	1.55069	0.032	0.020393	0.0742875	16287.7	7933.4	24542.3	588.43	0.503	295.98	292.45	40978	79332	51386	69805	48717	46356	74669	40313	72527	81359	38887	40891	69678	48241	36055	70728	58622	59077	64438	13504	39282	108846	19568	70078	22866	42732	5920	8184	22545	8519
Qinghai	28	2016	13.3707	0.034388	0.77688	18500	0.61973	1087.98	1.59918	0.031	0.020236	0.0741704	18005.8	8664.4	26757.4	593	0.5163	306.166	286.834	43796	85469	54846	72928	50431	49271	78862	41809	71273	88957	40880	46666	78808	55415	37917	79151	65582	67319	72434	13726	34848	105546	21583	66790	23425	42837	6138	8907	23772	9411
Qinghai	28	2017	12.2499	0.061851	0.782136	18400	0.631104	1119.96	1.67687	0.031	0.020067	0.0734106	19920.6	9462.3	29168.9	598	0.5307	317.359	280.641	51711	100823	59386	84618	57674	52477	86082	42829	79183	98911	44863	49908	87248	63194	41990	91790	75747	78577	85500	14459	31226	101341	23690	64791	22094	46890	6166	9000	22680	10399
Qinghai	28	2018	12.5364	0.066554	0.780758	19900	0.647927	1137.16	1.76218	0.03	0.0199	0.0767689	21898	10393.3	31514.5	603	0.5447	328.454	274.546	56145	117264	63952	96507	69611	66955	95947	46842	87547	103178	49772	55791	98698	74948	46051	101131	78625	80991	93527	12207	30387	89896	23717	57536	20479	45725	4895	8515	23071	9497
Qinghai	28	2019	12.8703	0.092152	0.8	16500	0.680958	1159.64	1.82942	0.022	0.019743	0.0790984	23897.5	11499.4	33830.3	607.82	0.5552	337.462	270.358	53169	130239	72550	102656	69924	70163	99865	45724	107050	117992	53146	61323	100798	69544	47641	99905	92817	78602	97769	5549	31343	89094	20809	45538	23679	51946	5752	9480	28961	13751
Ningxia	29	2003	4.022	0.206845	0.496984	1270	0.104684	1794.58	1.35811	0.044	0.02069	0.0549596	3760.04	2043.3	6530.5	580	0.382587	221.9	358.1	8269	14573	10424	18793	10893	9268	15341	7918	26867	19532	10678	11282	13876	12007	10566	15115	14119	13910	13757	44268	61652	120411	31450	43821	24695	32055	8063	6019	23027	6485
Ningxia	29	2004	3.7777	0.197007	0.549887	1700	0.106293	1875.9	1.50434	0.0451	0.022109	0.0554026	4505.17	2320.05	7748.53	588	0.40253	236.687	351.313	8447	17299	11875	20699	12277	11365	16308	8734	27114	23443	12390	13030	16730	13589	12956	16564	14537	15426	15450	41653	59715	119936	29529	41830	21906	32112	6770	5979	22660	6398
Ningxia	29	2005	5.5932	0.143141	0.558219	2010	0.113337	1969.58	1.61374	0.045	0.021812	0.0556379	4870.11	2508.9	8093.6	596	0.4228	251.989	344.011	9735	25827	13555	25876	11754	13172	18817	10404	33315	29232	14388	12010	18051	13633	13712	18256	18081	16287	17520	40319	55649	112768	35517	39699	20821	31373	7349	5392	23645	6812
Ningxia	29	2006	5.866	0.130813	0.619147	2320	0.121093	2997.44	1.7201	0.0431	0.021523	0.0573831	5519.5	2760.1	9177.3	604	0.43	259.72	344.28	11757	34339	15903	34783	13835	15909	23082	11150	33686	33365	15338	13398	22540	14959	15728	20935	18295	19337	19780	30397	56611	110300	36728	36829	18919	29015	6537	5067	25300	5856
Ningxia	29	2007	6.5898	0.139842	0.617492	3280	0.126262	3096.69	1.84427	0.043	0.021311	0.0567091	6560.88	3180.8	10859.3	610	0.4402	268.522	341.478	13833	41556	19461	39804	17052	19275	25339	13048	33878	40358	18560	16460	26749	18081	16211	27626	22549	26142	26790	34189	49684	112130	36289	30526	18497	28069	5931	5123	25607	9335
Ningxia	29	2008	6.986	0.071856	0.587547	3890	0.133724	3163.86	1.93568	0.044	0.021046	0.0598726	7842.09	3681.4	12931.5	617.69	0.4498	277.837	339.853	16458	52281	22917	45153	19373	24147	29595	14295	33972	46484	23086	19914	31069	20550	20979	30542	27099	29963	30683	30931	50069	106515	38957	24138	17375	28153	5597	6427	26383	7453
Ningxia	29	2009	8.2094	0.160577	0.68574	5120	0.142994	3283.89	2.08482	0.044	0.023992	0.0608102	8647.42	4048.3	14024.7	625.2	0.461	288.217	336.983	19384	57106	24431	46403	23367	25553	32226	15529	38298	47745	26031	20417	34346	22362	24951	34112	28514	32279	32017	24900	55518	105240	41616	24290	16477	30366	4894	6804	26529	8103
Ningxia	29	2010	8.7392	0.13803	0.677778	5690	0.209334	3391.27	2.211	0.044	0.023698	0.0622296	9785.64	4674.9	15344.5	632.96	0.479	303.188	329.772	20940	71685	29560	55543	25284	29497	36498	17799	42469	53674	28610	26137	36666	25155	23356	35785	31896	34118	33119	26339	57620	105891	36833	30200	15437	28744	4211	6423	26700	8063
Ningxia	29	2011	9.8777	0.188294	0.728244	7350	0.46368	3690.66	2.39575	0.044	0.025022	0.0632519	11472.5	5410	17578.9	639.45	0.4982	318.574	320.876	24563	78338	35503	65983	29065	33774	40967	22922	52173	62587	33348	30143	46198	32260	25688	40455	35707	42154	37427	27479	60090	107515	35453	26478	16016	31649	4034	5973	28026	10667
Ningxia	29	2012	10.7638	0.107426	0.710134	8340	0.481312	3994.28	2.54117	0.042	0.024722	0.0618457	13097.3	6180.3	19831.4	647.19	0.5067	327.931	319.259	28643	77581	39543	70533	38330	39124	50730	28149	59420	68814	42469	31927	49144	34281	37162	45954	43986	47805	44337	23789	65632	107791	41126	43860	27832	35667	6208	6304	29628	11392
Ningxia	29	2013	10.345	0.092439	0.732334	8560	0.494199	4300.3	2.55452	0.041	0.024458	0.0605543	14681.7	6931	21833.3	654.19	0.5201	340.244	313.946	32753	81809	43353	80137	39589	41684	54726	32363	65043	74026	42676	33492	57000	35624	35155	50283	44547	48919	47962	20069	66016	125706	34416	62389	27450	40421	6482	8267	30610	14410
Ningxia	29	2014	10.084	0.093362	0.740458	9370	0.504278	4710.24	2.64923	0.04	0.027209	0.0628329	16384.3	8410	23284.6	661.54	0.5361	354.652	306.888	35391	83893	50028	87483	40284	45770	58079	34360	69067	82011	43761	39230	63195	41362	36742	53696	50525	54120	50350	15496	63298	129449	37018	60228	27010	39414	6574	8431	34059	15147
Ningxia	29	2015	10.1661	0.064383	0.761716	10300	0.509972	5006.02	2.78004	0.04	0.026951	0.0655318	17992.7	9118.7	25186	667.88	0.5523	368.87	299.01	38815	79347	51636	92107	44283	47364	63157	36158	77487	81019	46157	40239	71581	44768	39732	64819	60676	62941	61236	14197	59676	128195	35146	53337	24713	37757	6772	8023	37667	16538
Ningxia	29	2016	9.9736	0.059746	0.766343	11000	0.556296	5111.45	1.96765	0.039	0.026667	0.0699957	19590.6	9851.6	27153	675	0.5629	379.957	295.043	41981	94718	52660	96132	46832	48648	68313	37149	80617	83872	49217	42957	76339	48789	41492	70801	71110	66563	67088	13273	52761	122084	34575	43591	24303	36718	6282	7782	40356	15117
Ningxia	29	2017	9.9282	0.045797	0.780872	12000	0.572874	5204.97	2.11245	0.039	0.027859	0.0732614	21600.1	10737.9	29472.3	682	0.5798	395.424	286.576	44844	96498	56273	103768	47483	51265	73175	40170	90085	85861	53023	42301	78182	51446	46712	77505	83680	67913	71658	12109	50282	124881	34083	41493	24109	37452	5852	8121	40090	14972
Ningxia	29	2018	9.2426	0.035579	0.8	12500	0.577762	5332.08	2.19817	0.039	0.027616	0.0765859	23594.1	11707.6	31895.2	688	0.5888	405.094	282.906	55938	113661	62086	111299	52886	56104	78953	42633	102816	88083	62424	45122	91621	56530	54836	83660	94246	77093	76665	8178	55574	98957	34769	35045	23760	38656	5272	7510	40604	13747
Ningxia	29	2019	8.4888	0.06801	0.81	10500	0.606484	5508.43	2.26711	0.037	0.027352	0.0738056	25710.4	12858.4	34328.5	694.66	0.5986	415.823	278.837	42833	128875	72097	120341	58762	57625	87961	44066	104328	95062	63217	53948	93039	56335	51987	87161	102088	82955	75518	7313	56075	89078	34672	34102	23334	38387	4632	7947	39427	14397
Xinjiang	30	2003	3.5423	0.090621	0.434749	1240	0.139245	502.33	0.783914	0.038	0.013444	0.0665529	3921.4	2106.2	7173.5	1934	0.358217	692.793	1241.21	8984	19978	12181	17724	11619	13082	17767	10337	23338	20680	13327	12666	16201	12091	13860	15167	15327	14966	15680	652100	139387	269113	55544	164957	80929	110560	27765	15337	60811	21783
Xinjiang	30	2004	3.3231	0.073295	0.458461	1430	0.150198	521.497	0.838926	0.038	0.014264	0.0635088	4418.2	2244.93	8201.82	1963	0.364833	716.167	1246.83	9281	21576	13518	20402	12705	14103	20266	11405	24032	24416	14060	13502	17777	13094	14269	16403	16537	16510	16802	625345	153773	258257	55380	157309	79355	115628	27608	16748	67334	23499
Xinjiang	30	2005	4.2925	0.050391	0.476254	1690	0.090483	537.756	0.883411	0.039	0.015423	0.0648669	4528.42	2482.2	7990.2	2010	0.3715	746.715	1263.28	9875	23337	14871	21920	14005	15127	23634	12417	27544	25149	14517	14176	19077	13419	12159	17183	17297	16972	17661	615396	159744	247204	56371	160628	75801	116471	27674	21717	57819	23341
Xinjiang	30	2006	4.905	0.068746	0.491759	2290	0.093644	863.331	0.939296	0.039	0.015122	0.0666508	5064.54	2737.3	8871.3	2050	0.3794	777.77	1272.23	11297	26701	16751	23247	15696	17122	25062	13454	28120	26146	15315	16099	21312	15022	14182	19612	19852	19154	20251	613878	174930	237084	57895	141335	76495	110921	28192	19021	59700	20041
Xinjiang	30	2007	4.9308	0.08019	0.504526	2630	0.097852	872.239	1.00015	0.039	0.015274	0.0676499	5974.55	3183	10313.4	2095	0.3915	820.192	1274.81	12976	32174	20382	28684	17865	20357	31248	15043	34764	34110	19493	16065	26571	17645	15705	23603	23265	23339	24973	602447	184319	250165	59900	143293	69671	110373	26530	18222	60376	26415
Xinjiang	30	2008	5.3546	0.065234	0.517721	3240	0.104266	880.846	1.06985	0.037	0.015018	0.0686289	6646.03	3502.9	11432.1	2130.81	0.3964	844.653	1286.16	14499	40857	24999	33229	21082	23332	36244	17136	34630	39158	19617	17931	29939	20295	16222	26536	26166	25554	28983	599523	177488	250300	59585	138386	65935	108388	27964	18927	64290	20491
Xinjiang	30	2009	5.9588	0.045353	0.527055	4310	0.107513	905.057	1.15756	0.038	0.014824	0.0704849	7220.3	3883.1	12257.5	2158.63	0.3985	860.214	1298.42	16862	42919	27400	38079	25118	26889	40249	18049	37875	45502	21389	19029	32633	22412	16022	29712	27471	28027	31217	579529	176178	253778	59973	143294	64198	108969	24200	19650	66930	21435
Xinjiang	30	2010	6.8922	0.067158	0.531641	5030	0.344027	918.031	1.32024	0.032	0.014645	0.0721261	8514.07	4642.7	13643.8	2185	0.4301	939.769	1245.23	20022	47805	31588	43855	28908	32343	45572	21954	43124	53127	23005	22517	38593	25575	18330	35016	32323	32609	35950	583455	175200	259793	60548	150092	64019	111062	23059	18463	71346	22975
Xinjiang	30	2011	8.5666	0.0764	0.5517	6790	0.430613	931.888	1.44102	0.032	0.014488	0.0722354	9827.29	5442.2	15513.6	2208.71	0.4354	961.672	1247.04	22678	63085	39883	50591	35558	40300	53243	28136	48034	59732	31948	27185	45501	28561	30968	40697	38552	38062	39862	579367	187089	300715	75924	206389	85038	123005	28885	24953	80947	27712
Xinjiang	30	2012	9.2603	0.054207	0.5735	7610	0.447603	996.51	1.57411	0.034	0.015228	0.0734598	11463.3	6393.7	17920.7	2232.78	0.4398	981.977	1250.8	26323	76486	47371	53796	41232	45733	62427	32468	54862	69445	36266	35016	50555	32060	27376	47187	44864	45049	45071	562081	188505	305850	75908	223839	82209	125981	28012	26395	81278	31876
Xinjiang	30	2013	9.3683	0.070683	0.53	8390	0.450426	1022.01	1.72265	0.034	0.015899	0.07825	12889.6	7296.5	19873.8	2264.3	0.4447	1006.93	1257.37	30199	79421	51673	62704	45940	49631	64997	37072	64214	74551	42100	39154	60859	36283	32441	50809	49696	50951	46636	549072	197095	336975	83170	262547	82750	174876	27791	28794	87380	39746
Xinjiang	30	2014	9.2697	0.070395	0.6171	8700	0.450735	1053.93	1.88921	0.032	0.016968	0.0816048	15399.4	8723.8	23214	2298.47	0.4607	1058.91	1239.56	33872	85241	57397	69737	51299	53353	71957	41040	70757	79653	45377	44272	65981	38981	35928	53792	53203	52299	48680	529489	192024	360261	94940	254343	82516	173796	23952	27698	88797	45106
Xinjiang	30	2015	9.2819	0.050979	0.6389	10200	0.443102	1070.71	1.99883	0.029	0.016527	0.0780765	17383.2	9425.1	26274.7	2359.73	0.4723	1114.5	1245.23	38070	86253	58752	70708	56238	56573	78215	43885	78238	88212	47160	44595	75478	46068	40614	69813	65463	64906	59598	517464	178515	348394	89279	247312	82386	167098	24060	28662	90236	50588
Xinjiang	30	2016	9.1073	0.033252	0.6607	10400	0.492035	1093.67	2.06045	0.032	0.017098	0.0763386	19021.7	10183.2	28463.4	2398	0.4835	1159.43	1238.57	38469	90442	60313	81908	58576	59570	83898	45899	84086	92422	49214	48110	79944	48099	42785	75080	70796	71168	63948	487830	160268	358374	96476	249814	89174	166127	22756	29006	94438	54074
Xinjiang	30	2017	9.2176	0.056504	0.6825	10600	0.512802	1113.21	2.13225	0.034	0.017178	0.0784502	20787.7	11045.3	30774.8	2445	0.4938	1207.34	1237.66	41571	105881	66523	88028	59844	66008	91702	46880	98251	95374	49079	51948	85516	49242	43116	76438	76240	80821	66710	496787	156764	355692	99396	263818	90383	166862	22228	28466	98061	56080
Xinjiang	30	2018	8.9877	0.122909	0.7	12100	0.573542	1135.5	2.23759	0.033	0.018094	0.0813792	22558.2	11974.5	32763.5	2487	0.5091	1266.13	1220.87	29723	123329	71906	97252	62485	73238	100047	48680	105184	99892	52727	54628	89605	51437	50435	78255	85671	79840	68980	102046	147033	325260	95819	217682	87363	166598	22819	31479	95267	51528
Xinjiang	30	2019	8.6521	0.055062	0.71	10300	0.585918	1166.57	2.29656	0.021	0.021401	0.083759	24295.5	13121.7	34663.7	2523.22	0.5187	1308.79	1214.43	44477	141572	77518	103826	67447	76349	104646	50008	104606	107334	54761	54636	95077	52537	59241	82439	86131	84009	66383	32053	140957	324398	101732	203655	103521	166577	25148	36214	112328	60180
[truncated: 8 more columns]

## Sheet: Sheet2
id	year	pro	居民可支配收入（元）	农村家庭可支配（元）	城市家庭可支配（元）	总人口数（万人）	城镇化率	城镇总人口（万人）	农村总人口（万人）	Province
1	2003	北 京	12342.1	5601.6	13882.6	1456	0.813976	1185.15	270.851	Beijing
1	2004	北 京	15204.9	6170.33	17116.5	1493	0.825367	1232.27	260.728	Beijing
1	2005	北 京	15964.8	7346.3	17653	1538	0.8362	1286.08	251.924	Beijing
1	2006	北 京	18143.8	8275.5	19977.5	1581	0.8433	1333.26	247.743	Beijing
1	2007	北 京	20043.6	9439.6	21988.7	1633	0.845	1379.88	253.115	Beijing
1	2008	北 京	22601.4	10661.9	24724.9	1771	0.849	1503.58	267.421	Beijing
1	2009	北 京	24478	11668.6	26738.5	1860	0.85	1581	279	Beijing
1	2010	北 京	26853.1	13262.3	29072.9	1961.9	0.8596	1686.45	275.451	Beijing
1	2011	北 京	30395.9	14735.7	32903	2018.6	0.862	1740.03	278.567	Beijing
1	2012	北 京	33709.8	16475.7	36468.8	2069.3	0.862	1783.74	285.563	Beijing
1	2013	北 京	37309.3	18337.5	40321	2114.8	0.863	1825.07	289.728	Beijing
1	2014	北 京	44482.6	18867.3	48531.8	2151.6	0.8635	1857.91	293.693	Beijing
1	2015	北 京	48500	20568.7	52859.2	2170.5	0.865	1877.48	293.017	Beijing
1	2016	北 京	52554.9	22309.5	57275.3	2173	0.865	1879.64	293.355	Beijing
1	2017	北 京	57253.9	24240.5	62406.3	2170.7	0.865	1877.66	293.044	Beijing
1	2018	北 京	62387.5	26490.3	67989.9	2154	0.865	1863.21	290.79	Beijing
1	2019	北 京	67829.2	28928.4	73848.5	2153.6	0.866	1865.02	288.582	Beijing
2	2003	天 津	8813.07	4566	10312.9	1011	0.739019	747.148	263.852	Tianjin
2	2004	天 津	10429.2	5019.53	12279.7	1024	0.745106	762.989	261.011	Tianjin
2	2005	天 津	10881.7	5579.9	12638.6	1043	0.7511	783.397	259.603	Tianjin
2	2006	天 津	12328.1	6227.9	14283.1	1075	0.7573	814.098	260.902	Tianjin
2	2007	天 津	14143	7010.1	16357.4	1115	0.7631	850.856	264.144	Tianjin
2	2008	天 津	16801.3	7910.8	19422.5	1176	0.7723	908.225	267.775	Tianjin
2	2009	天 津	18606.1	8687.6	21402	1228.16	0.7801	958.088	270.072	Tianjin
2	2010	天 津	21385.1	10074.9	24292.6	1299.29	0.7955	1033.59	265.705	Tianjin
2	2011	天 津	24074	12321.2	26920.9	1354.58	0.805	1090.44	264.143	Tianjin
2	2012	天 津	26748	14025.5	29626.4	1413.15	0.8155	1152.42	260.726	Tianjin
2	2013	天 津	29333.8	15841	32293.6	1472.21	0.8201	1207.36	264.851	Tianjin
2	2014	天 津	28936.6	17014.2	31506	1516.81	0.8227	1247.88	268.93	Tianjin
2	2015	天 津	31389.7	18481.6	34101.3	1546.95	0.8264	1278.4	268.551	Tianjin
2	2016	天 津	34201.9	20075.6	37109.6	1562	0.8293	1295.37	266.633	Tianjin
2	2017	天 津	37115.5	21753.7	40277.5	1557	0.8293	1291.22	265.78	Tianjin
2	2018	天 津	39621.3	23065.2	42976.3	1560	0.8315	1297.14	262.86	Tianjin
2	2019	天 津	42597.7	24804.1	46118.9	1561.83	0.8348	1303.82	258.014	Tianjin
3	2003	河 北	4293.66	2853.4	7239.1	6769	0.3284	2222.94	4546.06	Hebei
3	2004	河 北	5006.54	3171.06	8381.42	6809	0.352275	2398.64	4410.36	Hebei
3	2005	河 北	5601.85	3481.6	9107.1	6851	0.3769	2582.14	4268.86	Hebei
3	2006	河 北	6301.48	3801.8	10304.6	6898	0.3844	2651.59	4246.41	Hebei
3	2007	河 北	7270.73	4293.4	11690.5	6943	0.4025	2794.56	4148.44	Hebei
3	2008	河 北	8418.01	4795.5	13441.1	6988.82	0.419	2928.32	4060.5	Hebei
3	2009	河 北	9264.2	5149.7	14718.3	7034.4	0.43	3024.79	4009.61	Hebei
3	2010	河 北	10543.9	5958	16263.4	7193.6	0.445	3201.15	3992.45	Hebei
3	2011	河 北	12214.4	7119.7	18292.2	7240.51	0.456	3301.67	3938.84	Hebei
3	2012	河 北	13913.6	8081.4	20543.4	7287.51	0.468	3410.55	3876.96	Hebei
3	2013	河 北	15587.7	9101.9	22580.3	7332.61	0.4812	3528.45	3804.16	Hebei
3	2014	河 北	17070.2	10186.1	24141.3	7383.75	0.4933	3642.4	3741.35	Hebei
3	2015	河 北	18802.2	11050.5	26152.2	7424.92	0.5133	3811.21	3613.71	Hebei
3	2016	河 北	20626.6	11919.4	28249.4	7470	0.5332	3983	3487	Hebei
3	2017	河 北	22599.5	12880.9	30547.8	7519.52	0.5501	4136.49	3383.03	Hebei
3	2018	河 北	24722.3	14030.9	32977.2	7556	0.5643	4263.85	3292.15	Hebei
3	2019	河 北	27107.2	15373.1	35737.7	7591.97	0.5762	4374.49	3217.48	Hebei
4	2003	山 西	4145.38	2299.2	7005	3314	0.392321	1300.15	2013.85	Shanxi
4	2004	山 西	4963.94	2589.6	8428.81	3335	0.40662	1356.08	1978.92	Shanxi
4	2005	山 西	5427.07	2890.7	8913.9	3355	0.4211	1412.79	1942.21	Shanxi
4	2006	山 西	6125.71	3180.9	10027.7	3375	0.4301	1451.59	1923.41	Shanxi
4	2007	山 西	7143.76	3665.7	11565	3393	0.4403	1493.94	1899.06	Shanxi
4	2008	山 西	8166.98	4097.2	13119.1	3410.64	0.4511	1538.54	1872.1	Shanxi
4	2009	山 西	8729.27	4244.1	13996.6	3427.36	0.4599	1576.24	1851.12	Shanxi
4	2010	山 西	9979.23	4736.3	15647.7	3574.11	0.4805	1717.36	1856.75	Shanxi
4	2011	山 西	11822.6	5601.4	18123.9	3593.28	0.4968	1785.14	1808.14	Shanxi
4	2012	山 西	13561.2	6356.6	20411.7	3610.83	0.5126	1850.91	1759.92	Shanxi
4	2013	山 西	15196.3	7153.5	22455.6	3629.8	0.5256	1907.82	1721.98	Shanxi
4	2014	山 西	17017.8	8809.4	24069.4	3647.96	0.5379	1962.24	1685.72	Shanxi
4	2015	山 西	18464.4	9453.9	25827.7	3664.12	0.5503	2016.37	1647.75	Shanxi
4	2016	山 西	19789.9	10082.5	27352.3	3682	0.5621	2069.65	1612.35	Shanxi
4	2017	山 西	21306.1	10787.5	29131.8	3702	0.5734	2122.73	1579.27	Shanxi
4	2018	山 西	23014.3	11750	31034.8	3718	0.5841	2171.68	1546.32	Shanxi
4	2019	山 西	25026.8	12902.4	33262.4	3729	0.5955	2220.62	1508.38	Shanxi
5	2003	内蒙古	4423.87	2267.7	7012.9	2386	0.45439	1084.17	1301.83	Inner Monglia
5	2004	内蒙古	5330.7	2606.37	8488.13	2393	0.463183	1108.4	1284.6	Inner Monglia
5	2005	内蒙古	5890.71	2988.9	9136.8	2403	0.472	1134.22	1268.78	Inner Monglia
5	2006	内蒙古	6754.53	3341.9	10358	2415	0.4864	1174.66	1240.34	Inner Monglia
5	2007	内蒙古	8178.09	3953.1	12377.8	2429	0.5015	1218.14	1210.86	Inner Monglia
5	2008	内蒙古	9711.58	4656.2	14432.6	2444.33	0.5171	1263.96	1180.37	Inner Monglia
5	2009	内蒙古	10764.5	4937.8	15849.2	2458.22	0.534	1312.69	1145.53	Inner Monglia
5	2010	内蒙古	12283.2	5529.6	17698.2	2472.18	0.555	1372.06	1100.12	Inner Monglia
5	2011	内蒙古	14435.9	6641.6	20407.6	2481.71	0.5662	1405.14	1076.57	Inner Monglia
5	2012	内蒙古	16583.5	7611.3	23150.3	2489.85	0.5774	1437.64	1052.21	Inner Monglia
5	2013	内蒙古	18518.3	8595.7	25496.7	2497.61	0.5871	1466.35	1031.26	Inner Monglia
5	2014	内蒙古	20910.3	9976.3	28349.6	2504.81	0.5951	1490.61	1014.2	Inner Monglia
5	2015	内蒙古	22726.3	10775.9	30594.1	2511.04	0.603	1514.16	996.883	Inner Monglia
5	2016	内蒙古	24682.8	11609	32974.9	2520	0.6119	1541.99	978.012	Inner Monglia
5	2017	内蒙古	26902.1	12584.3	35670	2529	0.6202	1568.49	960.514	Inner Monglia
5	2018	内蒙古	29167.9	13802.6	38304.7	2534	0.6271	1589.07	944.929	Inner Monglia
5	2019	内蒙古	31442	15282.8	40782.5	2539.56	0.6337	1609.32	930.241	Inner Monglia
6	2003	辽 宁	5387.74	2934.4	7240.6	4210	0.569723	2398.54	1811.46	Liaoning
6	2004	辽 宁	6430.03	3307.14	8706.46	4217	0.578386	2439.05	1777.95	Liaoning
6	2005	辽 宁	6870.21	3690.2	9107.6	4221	0.587	2477.73	1743.27	Liaoning
6	2006	辽 宁	7794.5	4090.4	10369.6	4271	0.5899	2519.46	1751.54	Liaoning
6	2007	辽 宁	9229.38	4773.4	12300.4	4298	0.592	2544.42	1753.58	Liaoning
6	2008	辽 宁	10870.6	5576.5	14392.7	4315	0.6005	2591.16	1723.84	Liaoning
6	2009	辽 宁	11874.4	5958	15761.4	4341	0.6035	2619.79	1721.21	Liaoning
6	2010	辽 宁	13617.6	6907.9	17712.6	4375	0.621	2716.88	1658.12	Liaoning
6	2011	辽 宁	16091.6	8296.5	20466.8	4383	0.6405	2807.31	1575.69	Liaoning
6	2012	辽 宁	18469	9383.7	23222.7	4389	0.6565	2881.38	1507.62	Liaoning
6	2013	辽 宁	20527.1	10522.7	25578.2	4390	0.6645	2917.16	1472.84	Liaoning
6	2014	辽 宁	23186.9	11191.5	29081.7	4391	0.6705	2944.17	1446.83	Liaoning
6	2015	辽 宁	24899.7	12056.9	31125.7	4382.4	0.6735	2951.55	1430.85	Liaoning
6	2016	辽 宁	26351.6	12880.7	32876.1	4378	0.6737	2949.46	1428.54	Liaoning
6	2017	辽 宁	28086.1	13746.8	34993.4	4369	0.6749	2948.64	1420.36	Liaoning
6	2018	辽 宁	30105.2	14656.3	37341.9	4359	0.681	2968.48	1390.52	Liaoning
6	2019	辽 宁	32229.2	16108.3	39777.2	4351.7	0.6811	2963.94	1387.76	Liaoning
7	2003	吉 林	4831.38	2530.4	7005.2	2704	0.514209	1390.42	1313.58	Jilin
7	2004	吉 林	5716.21	2999.62	8226.78	2709	0.519707	1407.89	1301.11	Jilin
7	2005	吉 林	6114.05	3264	8690.6	2716	0.5252	1426.44	1289.56	Jilin
7	2006	吉 林	6890.28	3641.1	9775.1	2723	0.5297	1442.37	1280.63	Jilin
7	2007	吉 林	7962.58	4191.3	11285.5	2730	0.5316	1451.27	1278.73	Jilin
7	2008	吉 林	9134.59	4932.7	12829.5	2734.21	0.5321	1454.87	1279.34	Jilin
7	2009	吉 林	9926.28	5265.9	14006.3	2739.55	0.5332	1460.73	1278.82	Jilin
7	2010	吉 林	11131.8	6237.4	15411.5	2746.6	0.5335	1465.31	1281.29	Jilin
7	2011	吉 林	13003	7510	17796.6	2749.41	0.534	1468.18	1281.23	Jilin
7	2012	吉 林	14832.7	8598.2	20208	2750.4	0.537	1476.96	1273.44	Jilin
7	2013	吉 林	16479.3	9621.2	22274.6	2751.28	0.542	1491.19	1260.09	Jilin
7	2014	吉 林	17597.2	10780.1	23217.8	2752.38	0.5481	1508.58	1243.8	Jilin
7	2015	吉 林	18834.4	11326.2	24900.9	2753.32	0.5531	1522.86	1230.46	Jilin
7	2016	吉 林	20186.8	12122.9	26530.4	2733	0.5597	1529.66	1203.34	Jilin
7	2017	吉 林	21656.5	12950.4	28318.7	2717	0.5665	1539.18	1177.82	Jilin
7	2018	吉 林	23196.8	13748.2	30171.9	2704	0.5753	1555.61	1148.39	Jilin
7	2019	吉 林	25053.5	14936	32299.2	2690.73	0.5827	1567.89	1122.84	Jilin
8	2003	黑龙江	4698.84	2508.9	6678.9	3815	0.525165	2003.5	1811.5	Heilongjiang
8	2004	黑龙江	5539.05	3005.18	7803.41	3817	0.528083	2015.69	1801.31	Heilongjiang
8	2005	黑龙江	5903.49	3221.3	8272.5	3820	0.531	2028.42	1791.58	Heilongjiang
8	2006	黑龙江	6564.4	3552.4	9182.3	3823	0.535	2045.31	1777.69	Heilongjiang
8	2007	黑龙江	7427.21	4132.3	10245.3	3824	0.539	2061.14	1762.86	Heilongjiang
8	2008	黑龙江	8581.64	4855.6	11581.3	3825.04	0.554	2119.07	1705.97	Heilongjiang
8	2009	黑龙江	9291.16	5206.8	12566	3826.01	0.555	2123.44	1702.57	Heilongjiang
8	2010	黑龙江	10466.4	6210.7	13856.5	3833.35	0.5566	2133.64	1699.71	Heilongjiang
8	2011	黑龙江	12170.3	7590.7	15696.2	3834.01	0.565	2166.22	1667.79	Heilongjiang
8	2012	黑龙江	13813.6	8603.8	17759.8	3834.04	0.569	2181.57	1652.47	Heilongjiang
8	2013	黑龙江	15352.8	9634.1	19597	3835.02	0.574	2201.3	1633.72	Heilongjiang
8	2014	黑龙江	17504.8	10453.2	22609	3833	0.5801	2223.52	1609.48	Heilongjiang
8	2015	黑龙江	18802.4	11095.2	24202.6	3811.7	0.588	2241.28	1570.42	Heilongjiang
8	2016	黑龙江	20063.4	11831.9	25736.4	3799	0.592	2249.01	1549.99	Heilongjiang
8	2017	黑龙江	21444.8	12664.8	27446	3788.7	0.594	2250.49	1538.21	Heilongjiang
8	2018	黑龙江	23051.6	13803.7	29191.3	3773	0.601	2267.57	1505.43	Heilongjiang
8	2019	黑龙江	24703.3	14982.1	30944.6	3751.3	0.609	2284.54	1466.76	Heilongjiang
9	2003	上 海	13951.3	6653.9	14867.5	1766	0.888456	1569.01	196.987	Shanghai
9	2004	上 海	17240.2	7066.33	18501.7	1835	0.889684	1632.57	202.43	Shanghai
9	2005	上 海	17510.7	8247.8	18645	1890	0.8909	1683.8	206.199	Shanghai
9	2006	上 海	19365.1	9138.7	20667.9	1964	0.887	1742.07	221.932	Shanghai
9	2007	上 海	22099.7	10144.6	23622.7	2064	0.887	1830.77	233.232	Shanghai
9	2008	上 海	24938.2	11440.3	26674.9	2140.64	0.886	1896.61	244.033	Shanghai
9	2009	上 海	26973.3	12482.9	28837.8	2210.28	0.886	1958.31	251.972	Shanghai
9	2010	上 海	29927.1	13978	31838.1	2302.66	0.893	2056.28	246.385	Shanghai
9	2011	上 海	34071.6	16053.8	36230.5	2347.46	0.893	2096.28	251.178	Shanghai
9	2012	上 海	37793.1	17803.7	40188.3	2380.43	0.893	2125.72	254.706	Shanghai
9	2013	上 海	41328.7	19595	43851.4	2415.15	0.896	2163.97	251.176	Shanghai
9	2014	上 海	45965.8	21191.6	48841.4	2425.68	0.896	2173.41	252.271	Shanghai
9	2015	上 海	49272.1	23205.2	52961.9	2415.27	0.876	2115.78	299.493	Shanghai
9	2016	上 海	53799	25520.4	57691.7	2420	0.879	2127.18	292.82	Shanghai
9	2017	上 海	58318.9	27825	62595.7	2418	0.877	2120.59	297.414	Shanghai
9	2018	上 海	63552.2	30374.7	68033.6	2424	0.881	2135.54	288.456	Shanghai
9	2019	上 海	68886.1	33195.2	73615.3	2428.14	0.883	2144.05	284.092	Shanghai
10	2003	江 苏	6599.48	4239.3	9262.5	7458	0.469856	3504.18	3953.82	Jiangsu
10	2004	江 苏	7913.66	4753.85	11236.7	7523	0.487412	3666.8	3856.2	Jiangsu
10	2005	江 苏	8805.2	5276.3	12318.6	7588	0.5011	3802.35	3785.65	Jiangsu
10	2006	江 苏	10105.9	5813.2	14084.3	7656	0.519	3973.46	3682.54	Jiangsu
10	2007	江 苏	11783.6	6561	16378	7723	0.532	4108.64	3614.36	Jiangsu
10	2008	江 苏	13504.9	7356.5	18679.5	7762.48	0.543	4215.03	3547.45	Jiangsu
10	2009	江 苏	14980.3	8003.5	20551.7	7810.27	0.556	4342.51	3467.76	Jiangsu
10	2010	江 苏	17494.1	9118.2	22944.3	7869.34	0.6058	4767.25	3102.09	Jiangsu
10	2011	江 苏	20421.6	10805	26340.7	7898.8	0.619	4889.36	3009.44	Jiangsu
10	2012	江 苏	23211.2	12202	29677	7919.98	0.63	4989.59	2930.39	Jiangsu
10	2013	江 苏	25740.4	13597.8	32538	7939.49	0.6411	5090.01	2849.48	Jiangsu
10	2014	江 苏	27601.2	14958.4	34346.3	7960.06	0.6521	5190.76	2769.3	Jiangsu
10	2015	江 苏	30170.6	16256.7	37173.5	7976.3	0.6652	5305.83	2670.47	Jiangsu
10	2016	江 苏	32873.8	17605.6	40151.6	7999	0.6772	5416.92	2582.08	Jiangsu
10	2017	江 苏	35979.3	19158	43621.8	8029.3	0.6876	5520.95	2508.35	Jiangsu
10	2018	江 苏	39190.7	20845.1	47200	8051	0.6961	5604.3	2446.7	Jiangsu
10	2019	江 苏	42715	22675.4	51056.1	8070	0.7061	5698.23	2371.77	Jiangsu
11	2003	浙 江	9532.39	5389	13179.5	4857	0.531852	2583.21	2273.79	Jiangsu
11	2004	浙 江	11370.6	5944.06	15881.6	4925	0.546063	2689.36	2235.64	Zhejiang
11	2005	浙 江	12056.9	6660	16293.8	4991	0.5602	2795.96	2195.04	Zhejiang
11	2006	浙 江	13510.4	7334.8	18265.1	5072	0.565	2865.68	2206.32	Zhejiang
11	2007	浙 江	15305.7	8265.2	20573.8	5155	0.572	2948.66	2206.34	Zhejiang
11	2008	浙 江	17015.9	9257.9	22726.7	5212.4	0.576	3002.34	2210.06	Zhejiang
11	2009	浙 江	18462.7	10007.3	24610.8	5275.5	0.579	3054.51	2220.99	Zhejiang
11	2010	浙 江	21196.6	11302.6	27359	5446.51	0.6162	3356.14	2090.37	Zhejiang
11	2011	浙 江	24222.4	13070.7	30970.7	5463	0.623	3403.45	2059.55	Zhejiang
11	2012	浙 江	27190.9	14551.9	34550.3	5477	0.632	3461.46	2015.54	Zhejiang
11	2013	浙 江	30022.8	16106	37851	5498	0.64	3518.72	1979.28	Zhejiang
11	2014	浙 江	33008.6	19373.3	40392.7	5508	0.6487	3573.04	1934.96	Zhejiang
11	2015	浙 江	35988.9	21125	43714.5	5539	0.658	3644.66	1894.34	Zhejiang
11	2016	浙 江	39194.7	22866.1	47237.2	5590	0.67	3745.3	1844.7	Zhejiang
11	2017	浙 江	42843.1	24955.8	51260.7	5657	0.68	3846.76	1810.24	Zhejiang
11	2018	浙 江	46781.7	27302.4	55574.3	5737	0.689	3952.79	1784.21	Zhejiang
11	2019	浙 江	51090.4	29875.8	60182.3	5850	0.7	4095	1755	Zhejiang
12	2003	安 徽	3632.83	2127.5	6778	6163	0.323692	1994.91	4168.09	Anhui
12	2004	安 徽	4362.8	2499.33	7993.55	6228	0.33917	2112.35	4115.65	Anhui
12	2005	安 徽	4710.54	2641	8470.7	6120	0.355	2172.6	3947.4	Anhui
12	2006	安 徽	5492.64	2969.1	9771.1	6110	0.371	2266.81	3843.19	Anhui
12	2007	安 徽	6620.3	3556.3	11473.6	6118	0.387	2367.67	3750.33	Anhui
12	2008	安 徽	7761.6	4202.5	12990.4	6135	0.405	2484.68	3650.32	Anhui
12	2009	安 徽	8538.07	4504.3	14085.7	6131	0.421	2581.15	3549.85	Anhui
12	2010	安 徽	9802.54	5285.2	15788.2	5956.7	0.4301	2561.98	3394.72	Anhui
12	2011	安 徽	11775.7	6232.2	18606.1	5968	0.448	2673.66	3294.34	Anhui
12	2012	安 徽	13607.1	7160.5	21024.2	5988	0.465	2784.42	3203.58	Anhui
12	2013	安 徽	15284.7	8097.9	23114.2	6029.8	0.4786	2885.86	3143.94	Anhui
12	2014	安 徽	17250.6	9916.4	24838.5	6082.9	0.4915	2989.75	3093.15	Anhui
12	2015	安 徽	18958.8	10820.7	26935.8	6143.6	0.505	3102.52	3041.08	Anhui
12	2016	安 徽	20785.2	11720.5	29156	6196	0.5199	3221.3	2974.7	Anhui
12	2017	安 徽	22858.2	12758.2	31640.3	6255	0.5349	3345.8	2909.2	Anhui
12	2018	安 徽	25151.2	13996	34393.1	6324	0.5469	3458.6	2865.4	Anhui
12	2019	安 徽	27763.4	15416	37540	6365.9	0.5581	3552.81	2813.09	Anhui
13	2003	福 建	6636.91	3733.9	9999.5	3502	0.463326	1622.57	1879.43	Fujian
13	2004	福 建	7932.19	4089.38	12117.9	3529	0.478643	1689.13	1839.87	Fujian
13	2005	福 建	8173.34	4450.4	12321.3	3557	0.473	1682.46	1874.54	Fujian
13	2006	福 建	9115.68	4834.8	13753.3	3585	0.48	1720.8	1864.2	Fujian
13	2007	福 建	10355.8	5467.1	15505.4	3612	0.487	1759.04	1852.96	Fujian
13	2008	福 建	12067	6196.1	17961.5	3639	0.499	1815.86	1823.14	Fujian
13	2009	福 建	13309.1	6680.2	19576.8	3666	0.514	1884.32	1781.68	Fujian
13	2010	福 建	15623.3	7426.9	21781.3	3693	0.571	2108.7	1584.3	Fujian
13	2011	福 建	18149.4	8778.6	24907.4	3720	0.581	2161.32	1558.68	Fujian
13	2012	福 建	20747.6	9967.2	28055.2	3748	0.596	2233.81	1514.19	Fujian
13	2013	福 建	23114.7	11184.2	30816.4	3774	0.6077	2293.46	1480.54	Fujian
13	2014	福 建	23818.8	12650.2	30722.4	3806	0.618	2352.11	1453.89	Fujian
13	2015	福 建	25988.8	13792.7	33275.3	3839	0.626	2403.21	1435.79	Fujian
13	2016	福 建	28364.8	14999.2	36014.3	3874	0.636	2463.86	1410.14	Fujian
13	2017	福 建	31022.8	16334.8	39001.4	3911	0.648	2534.33	1376.67	Fujian
13	2018	福 建	33815.5	17821.2	42121.3	3941	0.6582	2593.97	1347.03	Fujian
13	2019	福 建	36893	19568.4	45620.5	3973	0.665	2642.05	1330.95	Fujian
14	2003	江 西	3929.98	2457.5	6901.4	4254	0.331349	1409.56	2844.44	Jiangxi
14	2004	江 西	4570.44	2786.78	7876.7	4284	0.350429	1501.24	2782.76	Jiangxi
14	2005	江 西	5160.5	3128.9	8619.7	4311	0.37	1595.07	2715.93	Jiangxi
14	2006	江 西	5815.73	3459.5	9551.1	4339	0.3868	1678.33	2660.67	Jiangxi
14	2007	江 西	6992.69	4044.7	11451.7	4368	0.398	1738.46	2629.54	Jiangxi
14	2008	江 西	8075.98	4697.2	12866.4	4400.1	0.4136	1819.88	2580.22	Jiangxi
14	2009	江 西	8938.1	5075	14021.5	4432.16	0.4318	1913.81	2518.35	Jiangxi
14	2010	江 西	10059.1	5788.6	15481.1	4462.25	0.4406	1966.07	2496.18	Jiangxi
14	2011	江 西	11737.3	6891.6	17494.9	4488.44	0.457	2051.22	2437.22	Jiangxi
14	2012	江 西	13545.3	7829.4	19860.4	4503.93	0.4751	2139.82	2364.11	Jiangxi
14	2013	江 西	15179.2	8781.5	21872.7	4522.15	0.4887	2209.97	2312.18	Jiangxi
14	2014	江 西	17244.1	10116.6	24309.2	4542.16	0.5022	2281.07	2261.09	Jiangxi
14	2015	江 西	19068.4	11139.1	26500.1	4565.63	0.5162	2356.78	2208.85	Jiangxi
14	2016	江 西	20918.1	12137.7	28673.3	4592	0.531	2438.35	2153.65	Jiangxi
14	2017	江 西	23045.9	13241.8	31198.1	4622	0.546	2523.61	2098.39	Jiangxi
14	2018	江 西	25305.1	14459.9	33819.4	4648	0.5602	2603.81	2044.19	Jiangxi
14	2019	江 西	27710.7	15796.3	36545.9	4666.13	0.5742	2679.29	1986.84	Jiangxi
15	2003	山 东	5368.19	3150.5	8399.9	9125	0.422466	3855	5270	Shandong
15	2004	山 东	6421	3507.43	10187.1	9180	0.436184	4004.17	5175.83	Shandong
15	2005	山 东	6996.93	3930.5	10744.8	9248	0.45	4161.6	5086.4	Shandong
15	2006	山 东	7975.12	4368.3	12192.2	9309	0.461	4291.45	5017.55	Shandong
15	2007	山 东	9323.42	4985.3	14264.7	9367	0.4675	4379.07	4987.93	Shandong
15	2008	山 东	10717.5	5641.4	16305.4	9417.23	0.476	4482.6	4934.63	Shandong
15	2009	山 东	11768.5	6118.8	17811	9470.3	0.4832	4576.05	4894.25	Shandong
15	2010	山 东	13429.2	6990.3	19945.8	9587.87	0.497	4765.17	4822.7	Shandong
15	2011	山 东	15704.2	8342.1	22791.8	9637.27	0.5095	4910.19	4727.08	Shandong
15	2012	山 东	17997.2	9446.5	25755.2	9684.87	0.5243	5077.78	4607.09	Shandong
15	2013	山 东	20103.7	10619.9	28264.1	9733.39	0.5375	5231.7	4501.69	Shandong
15	2014	山 东	21420.8	11882.3	29221.9	9789.43	0.5501	5385.17	4404.26	Shandong
15	2015	山 东	23542.8	12930.4	31545.3	9847.16	0.5701	5613.87	4233.29	Shandong
15	2016	山 东	25792.3	13954.1	34012.1	9947	0.5902	5870.72	4076.28	Shandong
15	2017	山 东	28246.3	15117.5	36789.4	10005.8	0.6058	6061.53	3944.3	Shandong
15	2018	山 东	30522.8	16297	39549.4	10047	0.6118	6146.75	3900.25	Shandong
15	2019	山 东	32878.5	17775.5	42329.2	10070.2	0.6151	6194.19	3876.02	Shandong
16	2003	河 南	3528.27	2235.7	6926.1	9667	0.275579	2664.02	7002.98	Henan
16	2004	河 南	4158.41	2553.15	8073.36	9717	0.290797	2825.67	6891.33	Henan
16	2005	河 南	4647.5	2870.6	8668	9380	0.3065	2874.97	6505.03	Henan
16	2006	河 南	5387.56	3261	9810.3	9392	0.3247	3049.58	6342.42	Henan
16	2007	河 南	6470.2	3851.6	11477.1	9360	0.3434	3214.22	6145.78	Henan
16	2008	河 南	7616.52	4454.2	13231.1	9429	0.3603	3397.27	6031.73	Henan
16	2009	河 南	8412.85	4807	14371.6	9487.05	0.377	3576.62	5910.43	Henan
16	2010	河 南	9530.24	5523.7	15930.3	9405.47	0.385	3621.11	5784.36	Henan
16	2011	河 南	11306.4	6604	18194.8	9388.24	0.4057	3808.81	5579.43	Henan
16	2012	河 南	13005.9	7524.9	20442.6	9406.2	0.4243	3991.05	5415.15	Henan
16	2013	河 南	14573.4	8475.3	22398	9413.35	0.438	4123.05	5290.3	Henan
16	2014	河 南	16161.2	9966.1	23672.1	9436	0.452	4265.07	5170.93	Henan
16	2015	河 南	17750.5	10852.9	25575.6	9480	0.4685	4441.38	5038.62	Henan
16	2016	河 南	19231.8	11696.7	27232.9	9532	0.485	4623.02	4908.98	Henan
16	2017	河 南	21165.5	12719.2	29557.9	9559.13	0.5016	4794.86	4764.27	Henan
16	2018	河 南	23161	13830.7	31874.2	9605	0.5171	4966.75	4638.25	Henan
16	2019	河 南	25293.4	15163.7	34201	9639.75	0.5321	5129.31	4510.44	Henan
17	2003	湖 北	4569.03	2566.8	7322	5685	0.421061	2393.73	3291.27	Hubei
17	2004	湖 北	5292.2	2890.01	8522.06	5698	0.426522	2430.32	3267.68	Hubei
17	2005	湖 北	5555.85	3099.2	8785.9	5710	0.432	2466.72	3243.28	Hubei
17	2006	湖 北	6215.29	3419.4	9802.7	5693	0.438	2493.53	3199.47	Hubei
17	2007	湖 北	7314.82	3997.5	11485.8	5699	0.443	2524.66	3174.34	Hubei
17	2008	湖 北	8496.82	4656.4	13152.9	5711	0.452	2581.37	3129.63	Hubei
17	2009	湖 北	9328.11	5035.3	14367.5	5720	0.46	2631.2	3088.8	Hubei
17	2010	湖 北	10914.7	5832.3	16058.4	5727.91	0.497	2846.77	2881.14	Hubei
17	2011	湖 北	12845.9	6897.9	18373.9	5758	0.5183	2984.37	2773.63	Hubei
17	2012	湖 北	14800.2	7851.7	20839.6	5779	0.535	3091.77	2687.23	Hubei
17	2013	湖 北	16519.9	8867	22906.4	5799	0.5451	3161.03	2637.97	Hubei
17	2014	湖 北	18644.7	10849.1	24852.3	5816	0.5567	3237.77	2578.23	Hubei
17	2015	湖 北	20489.4	11843.9	27051.5	5851.5	0.5685	3326.58	2524.92	Hubei
17	2016	湖 北	22404.9	12725	29385.8	5885	0.581	3419.19	2465.81	Hubei
17	2017	湖 北	24531.9	13812.1	31889.4	5902	0.593	3499.89	2402.11	Hubei
17	2018	湖 北	26722.3	14977.8	34454.6	5917	0.603	3567.95	2349.05	Hubei
17	2019	湖 北	29329.3	16390.9	37601.4	5927	0.61	3615.47	2311.53	Hubei
18	2003	湖 南	4285.23	2532.9	7674.2	6663	0.340833	2270.97	4392.03	Hunan
18	2004	湖 南	5094.67	2837.76	9190.21	6698	0.355282	2379.68	4318.32	Hunan
18	2005	湖 南	5488.03	3117.7	9524	6326	0.37	2340.62	3985.38	Hunan
18	2006	湖 南	6143.86	3389.6	10504.7	6342	0.3871	2454.99	3887.01	Hunan
18	2007	湖 南	7297.67	3904.2	12293.5	6355	0.4045	2570.6	3784.4	Hunan
18	2008	湖 南	8436.12	4512.5	13821.2	6380	0.4215	2689.17	3690.83	Hunan
18	2009	湖 南	9304.73	4909	15084.3	6406	0.432	2767.39	3638.61	Hunan
18	2010	湖 南	10360.6	5622	16565.7	6570.1	0.433	2844.85	3725.25	Hunan
18	2011	湖 南	12104	6567.1	18844.1	6595.6	0.451	2974.62	3620.98	Hunan
18	2012	湖 南	13914.6	7440.2	21318.8	6638.93	0.4665	3097.06	3541.87	Hunan
18	2013	湖 南	15586.2	8372.1	23414	6690.6	0.4796	3208.81	3481.79	Hunan
18	2014	湖 南	18196.3	10060.2	26570.2	6737.24	0.4928	3320.11	3417.13	Hunan
18	2015	湖 南	20074.1	10992.5	28838.1	6783.03	0.5089	3451.88	3331.15	Hunan
18	2016	湖 南	22139.4	11930.4	31283.9	6822	0.5275	3598.6	3223.4	Hunan
18	2017	湖 南	24412.6	12935.8	33947.9	6860.15	0.5462	3747.01	3113.14	Hunan
18	2018	湖 南	26756.3	14092.5	36698.3	6899	0.5602	3864.82	3034.18	Hunan
18	2019	湖 南	29383.4	15394.8	39841.9	6918.38	0.5722	3958.7	2959.68	Hunan
19	2003	广 东	8931.43	4054.6	12380.4	8963	0.585749	5250.07	3712.93	Guangdong
19	2004	广 东	10679.4	4365.87	14953.4	9111	0.596319	5433.06	3677.94	Guangdong
19	2005	广 东	10806.7	4690.5	14769.9	9194	0.6068	5578.92	3615.08	Guangdong
19	2006	广 东	11969.4	5079.8	16015.6	9442	0.63	5948.46	3493.54	Guangdong
19	2007	广 东	13248.3	5624	17699.3	9660	0.6314	6099.32	3560.68	Guangdong
19	2008	广 东	14849	6399.8	19732.9	9893.48	0.6337	6269.5	3623.98	Guangdong
19	2009	广 东	16206.3	6906.9	21574.7	10130.2	0.634	6422.54	3707.65	Guangdong
19	2010	广 东	18484.1	7890.3	23897.8	10440.9	0.6618	6909.81	3531.13	Guangdong
19	2011	广 东	21026.4	9371.7	26897.5	10505	0.665	6985.83	3519.17	Guangdong
19	2012	广 东	23809.7	10542.8	30226.7	10594	0.674	7140.36	3453.64	Guangdong
19	2013	广 东	26184	11669.3	33090	10644	0.6776	7212.37	3431.63	Guangdong
19	2014	广 东	25779.3	12245.6	32148.1	10724	0.68	7292.32	3431.68	Guangdong
19	2015	广 东	28062.1	13360.4	34757.2	10849	0.6871	7454.35	3394.65	Guangdong
19	2016	广 东	30547.3	14512.2	37684.3	10999	0.692	7611.31	3387.69	Guangdong
19	2017	广 东	33378.7	15779.7	40975.1	11169	0.6985	7801.55	3367.45	Guangdong
19	2018	广 东	36379.2	17167.7	44341	11346	0.707	8021.62	3324.38	Guangdong
19	2019	广 东	39738	18818.4	48117.6	11521	0.714	8225.99	3295.01	Guangdong
20	2003	广 西	3884.33	2094.5	7785	4857	0.314529	1527.67	3329.33	Guangxi
20	2004	广 西	4588.22	2305.22	9324	4889	0.325271	1590.25	3298.75	Guangxi
20	2005	广 西	4778.17	2494.7	9286.7	4660	0.3362	1566.69	3093.31	Guangxi
20	2006	广 西	5239.74	2770.5	9898.8	4719	0.3464	1634.66	3084.34	Guangxi
20	2007	广 西	6477.11	3224.1	12200.4	4768	0.3624	1727.92	3040.08	Guangxi
20	2008	广 西	7680.2	3690.3	14146	4816	0.3816	1837.79	2978.21	Guangxi
20	2009	广 西	8477.07	3980.4	15451.5	4856	0.392	1903.55	2952.45	Guangxi
20	2010	广 西	9551.6	4543.4	17063.9	4610	0.4	1844	2766	Guangxi
20	2011	广 西	10925.6	5231.3	18854.1	4645	0.418	1941.61	2703.39	Guangxi
20	2012	广 西	12639.4	6007.5	21242.8	4682	0.4353	2038.07	2643.93	Guangxi
20	2013	广 西	14191	6790.9	23305.4	4719	0.4481	2114.58	2604.42	Guangxi
20	2014	广 西	16038.3	8683.2	24669	4754	0.4601	2187.32	2566.68	Guangxi
20	2015	广 西	17442.9	9466.6	26415.9	4796	0.4706	2257	2539	Guangxi
20	2016	广 西	18997	10359.5	28324.4	4838	0.4808	2326.11	2511.89	Guangxi
20	2017	广 西	20762.3	11325.5	30502.1	4885	0.4921	2403.91	2481.09	Guangxi
20	2018	广 西	22479.5	12434.8	32436.1	4926	0.5022	2473.84	2452.16	Guangxi
20	2019	广 西	24440	13675.7	34744.9	4960	0.5109	2534.06	2425.94	Guangxi
21	2003	海 南	4636.37	2588.1	7259.3	811	0.43849	355.615	455.385	Hainan
21	2004	海 南	5179.25	2817.62	8121.85	818	0.445235	364.202	453.798	Hainan
21	2005	海 南	5318.19	3004	8123.9	828	0.452	374.256	453.744	Hainan
21	2006	海 南	6085.86	3255.5	9395.1	836	0.461	385.396	450.604	Hainan
21	2007	海 南	7192.4	3791.4	10996.9	845	0.472	398.84	446.16	Hainan
21	2008	海 南	8334.54	4390	12607.8	854.18	0.48	410.006	444.174	Hainan
21	2009	海 南	9169.29	4744.4	13750.9	864.07	0.4913	424.518	439.552	Hainan
21	2010	海 南	10407.6	5275.4	15581.1	868.55	0.498	432.538	436.012	Hainan
21	2011	海 南	12467.1	6446	18369	877.38	0.505	443.077	434.303	Hainan
21	2012	海 南	14379	7408	20917.7	886.55	0.516	457.46	429.09	Hainan
21	2013	海 南	16035.4	8342.6	22928.9	895.28	0.5274	472.171	423.109	Hainan
21	2014	海 南	17747.5	9912.6	24486.5	903.48	0.5376	485.711	417.769	Hainan
21	2015	海 南	19400.5	10857.6	26356.4	910.82	0.5512	502.044	408.776	Hainan
21	2016	海 南	21274.4	11842.9	28453.5	917	0.5678	520.673	396.327	Hainan
21	2017	海 南	23300	12901.8	30817.4	926	0.5804	537.45	388.55	Hainan
21	2018	海 南	25422.8	13988.9	33348.7	934	0.5906	551.62	382.38	Hainan
21	2019	海 南	27494.3	15113.1	36016.7	944.72	0.5923	559.558	385.162	Hainan
22	2003	重 庆	4585.81	2214.6	8093.7	2803.19	0.403329	1130.61	1672.58	Chongqing
22	2004	重 庆	5673.69	2510.41	9910.09	2793	0.427489	1193.98	1599.02	Chongqing
22	2005	重 庆	6169.56	2809.3	10243.5	2798	0.452	1264.7	1533.3	Chongqing
22	2006	重 庆	6934.79	2873.8	11569.7	2808	0.467	1311.34	1496.66	Chongqing
22	2007	重 庆	7899.3	3509.3	12590.8	2816	0.4834	1361.25	1454.75	Chongqing
22	2008	重 庆	9245.88	4126.2	14367.6	2839	0.4999	1419.22	1419.78	Chongqing
22	2009	重 庆	10292.7	4478.4	15748.7	2859	0.5159	1474.96	1384.04	Chongqing
22	2010	重 庆	11774.7	5276.7	17532.4	2884.62	0.5302	1529.43	1355.19	Chongqing
22	2011	重 庆	14056.3	6480.4	20249.7	2919	0.5502	1606.03	1312.97	Chongqing
22	2012	重 庆	16263.5	7383.3	22968.1	2945	0.5698	1678.06	1266.94	Chongqing
22	2013	重 庆	18182.2	8332	25216.1	2970	0.5834	1732.7	1237.3	Chongqing
22	2014	重 庆	18821.6	9489.8	25147.2	2991.4	0.596	1782.87	1208.53	Chongqing
22	2015	重 庆	20702.5	10504.7	27238.8	3016.55	0.6094	1838.29	1178.26	Chongqing
22	2016	重 庆	22855.1	11548.8	29610	3048	0.626	1908.05	1139.95	Chongqing
22	2017	重 庆	25168.9	12637.9	32193.2	3075.16	0.6408	1970.56	1104.6	Chongqing
22	2018	重 庆	27607	13781.2	34889.3	3102	0.655	2031.81	1070.19	Chongqing
22	2019	重 庆	30367.2	15133.3	37938.6	3124.32	0.668	2087.05	1037.27	Chongqing
23	2003	四 川	3691.98	2229.9	7041.9	8176	0.303841	2484.2	5691.8	Sichuan
23	2004	四 川	4338.02	2518.93	8261.44	8090	0.316776	2562.71	5527.29	Sichuan
23	2005	四 川	4645.26	2802.8	8386	8212	0.33	2709.96	5502.04	Sichuan
23	2006	四 川	5179.66	3002.4	9350.1	8169	0.343	2801.97	5367.03	Sichuan
23	2007	四 川	6235.07	3546.7	11098.3	8127	0.356	2893.21	5233.79	Sichuan
23	2008	四 川	7304.76	4121.2	12633.4	8138	0.374	3043.61	5094.39	Sichuan
23	2009	四 川	8091.12	4462.1	13839.4	8185	0.387	3167.6	5017.4	Sichuan
23	2010	四 川	9255.29	5086.9	15461.2	8044.92	0.4018	3232.45	4812.47	Sichuan
23	2011	四 川	11052.2	6128.6	17899.1	8050	0.4183	3367.32	4682.68	Sichuan
23	2012	四 川	12793.3	7001.4	20307	8076.2	0.4353	3515.57	4560.63	Sichuan
23	2013	四 川	14393.4	7895.3	22367.6	8107	0.449	3640.04	4466.96	Sichuan
23	2014	四 川	16240.2	9347.7	24234.4	8140.2	0.463	3768.91	4371.29	Sichuan
23	2015	四 川	17857.7	10247.4	26205.3	8204	0.4769	3912.49	4291.51	Sichuan
23	2016	四 川	19633.9	11203.1	28335.3	8262	0.4921	4065.73	4196.27	Sichuan
23	2017	四 川	21623	12226.9	30726.9	8302	0.5079	4216.59	4085.41	Sichuan
23	2018	四 川	23729	13331.4	33215.9	8341	0.5229	4361.51	3979.49	Sichuan
23	2019	四 川	26226.1	14670.1	36153.7	8375	0.5379	4504.91	3870.09	Sichuan
24	2003	贵 州	2848.79	1564.7	6569.2	3870	0.256587	992.991	2877.01	Guizhou
24	2004	贵 州	3243.88	1721.55	7518.72	3904	0.262598	1025.18	2878.82	Guizhou
24	2005	贵 州	3562.85	1877	8151.1	3730	0.2687	1002.25	2727.75	Guizhou
24	2006	贵 州	3943.05	1984.6	9116.6	3690	0.2746	1013.27	2676.73	Guizhou
24	2007	贵 州	4719.16	2374	10678.4	3632	0.2824	1025.68	2606.32	Guizhou
24	2008	贵 州	5405.71	2796.9	11758.8	3595.98	0.2911	1046.79	2549.19	Guizhou
24	2009	贵 州	5951.69	3005.4	12862.5	3537	0.2989	1057.21	2479.79	Guizhou
24	2010	贵 州	7079.7	3471.9	14142.7	3479	0.3381	1176.25	2302.75	Guizhou
24	2011	贵 州	8462.82	4145.4	16495	3469	0.3496	1212.76	2256.24	Guizhou
24	2012	贵 州	9831.28	4753	18700.5	3484.07	0.3641	1268.55	2215.52	Guizhou
24	2013	贵 州	11196.7	5434	20667.1	3502.22	0.3783	1324.89	2177.33	Guizhou
24	2014	贵 州	13023.6	6671.2	22548.2	3508.04	0.4001	1403.57	2104.47	Guizhou
24	2015	贵 州	14609.6	7386.9	24579.6	3529.5	0.4201	1482.74	2046.76	Guizhou
24	2016	贵 州	16325.3	8090.3	26742.6	3555	0.4415	1569.53	1985.47	Guizhou
24	2017	贵 州	18170.1	8869.1	29079.8	3580	0.4602	1647.52	1932.48	Guizhou
24	2018	贵 州	20111.5	9716.1	31591.9	3600	0.4752	1710.72	1889.28	Guizhou
24	2019	贵 州	22348.5	10756.3	34404.2	3622.95	0.4902	1775.97	1846.98	Guizhou
25	2003	云 南	3301.87	1697.1	7643.6	4376	0.269868	1180.94	3195.06	Yunnan
25	2004	云 南	4032.57	1864.19	9546.29	4415	0.282264	1246.2	3168.8	Yunnan
25	2005	云 南	4172.91	2041.8	9265.9	4450	0.295	1312.75	3137.25	Yunnan
25	2006	云 南	4635.42	2250.5	10069.9	4483	0.305	1367.32	3115.68	Yunnan
25	2007	云 南	5434.49	2634.1	11496.1	4514	0.316	1426.42	3087.58	Yunnan
25	2008	云 南	6451.31	3102.6	13250.2	4543	0.33	1499.19	3043.81	Yunnan
25	2009	云 南	7127.86	3369.3	14423.9	4571	0.34	1554.14	3016.86	Yunnan
25	2010	云 南	8155.04	3952	16064.5	4601.6	0.347	1596.76	3004.84	Yunnan
25	2011	云 南	9820.12	4722	18575.6	4631	0.368	1704.21	2926.79	Yunnan
25	2012	云 南	11571.7	5416.5	21074.5	4659	0.3931	1831.45	2827.55	Yunnan
25	2013	云 南	13061	6141.3	23235.5	4686.6	0.4048	1897.14	2789.46	Yunnan
25	2014	云 南	14484.6	7456.1	24299	4713.9	0.4173	1967.11	2746.79	Yunnan
25	2015	云 南	16098.3	8242.1	26373.2	4741.8	0.4333	2054.62	2687.18	Yunnan
25	2016	云 南	17841.5	9019.8	28610.6	4771	0.4503	2148.38	2622.62	Yunnan
25	2017	云 南	19729.5	9862.2	30995.9	4800.5	0.4669	2241.35	2559.15	Yunnan
25	2018	云 南	21630.3	10767.9	33487.9	4830	0.4781	2309.22	2520.78	Yunnan
25	2019	云 南	23804.8	11902.4	36237.7	4858	0.4891	2376.05	2481.95	Yunnan
27	2003	陕 西	3484.82	1675.7	6806.4	3672	0.352607	1294.77	2377.23	Gansu
27	2004	陕 西	4104.94	1866.52	8043.23	3681	0.362396	1333.98	2347.02	Gansu
27	2005	陕 西	4368.08	2052.6	8272	3690	0.3723	1373.79	2316.21	Gansu
27	2006	陕 西	5001.53	2260.2	9267.7	3699	0.3912	1447.05	2251.95	Gansu
27	2007	陕 西	5942.48	2644.7	10763.3	3708	0.4062	1506.19	2201.81	Gansu
27	2008	陕 西	7229.21	3136.5	12857.9	3718	0.421	1565.28	2152.72	Gansu
27	2009	陕 西	8088.27	3437.6	14128.8	3727	0.435	1621.24	2105.76	Gansu
27	2010	陕 西	9408.68	4105	15695.2	3735	0.4576	1709.14	2025.86	Gansu
27	2011	陕 西	11279.7	5027.9	18245.2	3743	0.473	1770.44	1972.56	Gansu
27	2012	陕 西	13251.2	5762.5	20733.9	3753	0.5002	1877.25	1875.75	Gansu
27	2013	陕 西	14894.8	6502.6	22858.4	3764	0.5131	1931.31	1832.69	Gansu
27	2014	陕 西	16571.3	7932.2	24365.8	3775.12	0.5257	1984.58	1790.54	Gansu
27	2015	陕 西	18249.6	8688.9	26420.2	3793	0.5392	2045.19	1747.81	Gansu
27	2016	陕 西	19935.2	9396.4	28440.1	3813	0.5534	2110.11	1702.89	Gansu
27	2017	陕 西	21932.5	10264.5	30810.3	3835	0.5679	2177.9	1657.1	Gansu
27	2018	陕 西	24063.3	11212.8	33319.3	3864	0.5813	2246.14	1617.86	Gansu
27	2019	陕 西	26453.7	12325.7	36098.2	3876.21	0.5943	2303.63	1572.58	Gansu
28	2003	甘 肃	3046.42	1673.1	6657.2	2537	0.275541	699.047	1837.95	Qinghai
28	2004	甘 肃	3618.33	1852.22	7990.65	2541	0.287713	731.079	1809.92	Qinghai
28	2005	甘 肃	3813.19	1979.9	8086.8	2545	0.3002	764.009	1780.99	Qinghai
28	2006	甘 肃	4244.02	2134.1	8920.6	2547	0.3109	791.862	1755.14	Qinghai
28	2007	甘 肃	4756.09	2328.9	10012.3	2548	0.3159	804.913	1743.09	Qinghai
28	2008	甘 肃	5374.76	2723.8	10969.4	2550.88	0.3215	820.108	1730.77	Qinghai
28	2009	甘 肃	5902.18	2980.1	11929.8	2554.91	0.3265	834.178	1720.73	Qinghai
28	2010	甘 肃	6951.42	3424.7	13188.6	2559.98	0.3612	924.665	1635.32	Qinghai
28	2011	甘 肃	8025.36	3909.4	14988.7	2564.19	0.3715	952.597	1611.59	Qinghai
28	2012	甘 肃	9408.65	4506.7	17156.9	2577.55	0.3875	998.801	1578.75	Qinghai
28	2013	甘 肃	10668.6	5107.8	18964.8	2582.18	0.4013	1036.23	1545.95	Qinghai
28	2014	甘 肃	12748.4	6276.6	21803.9	2590.78	0.4168	1079.84	1510.94	Qinghai
28	2015	甘 肃	14205.5	6936.2	23767.1	2599.55	0.4319	1122.75	1476.8	Qinghai
28	2016	甘 肃	15606.8	7456.9	25693.5	2610	0.4469	1166.41	1443.59	Qinghai
28	2017	甘 肃	17209	8076.1	27763.4	2626	0.4639	1218.2	1407.8	Qinghai
28	2018	甘 肃	18891.9	8804.1	29957	2637	0.4769	1257.59	1379.41	Qinghai
28	2019	甘 肃	20633.5	9628.9	32323.4	2647.43	0.4849	1283.74	1363.69	Qinghai
29	2003	青 海	3650.26	1794.1	6745.3	534	0.374892	200.192	333.808	Ningxia
29	2004	青 海	4193.39	1957.65	7785.09	539	0.383658	206.791	332.209	Ningxia
29	2005	青 海	4469.76	2151.5	8057.9	543	0.3925	213.127	329.873	Ningxia
29	2006	青 海	4966.05	2358.4	9000.4	548	0.3926	215.145	332.855	Ningxia
29	2007	青 海	5726.03	2683.8	10276.1	552	0.4007	221.186	330.814	Ningxia
29	2008	青 海	6566.66	3061.2	11640.4	554.3	0.4086	226.487	327.813	Ningxia
29	2009	青 海	7262.05	3346.2	12691.9	557.3	0.419	233.509	323.791	Ningxia
29	2010	青 海	8331.26	3862.7	13855	563.47	0.4472	251.984	311.486	Ningxia
29	2011	青 海	9690.3	4608.5	15603.3	568.17	0.4622	262.608	305.562	Ningxia
29	2012	青 海	11153	5364.4	17566.3	573.17	0.4744	271.912	301.258	Ningxia
29	2013	青 海	12649.2	6196.4	19498.5	577.79	0.4851	280.286	297.504	Ningxia
29	2014	青 海	14761.6	7282.7	22306.6	583.42	0.4978	290.426	292.994	Ningxia
29	2015	青 海	16287.7	7933.4	24542.3	588.43	0.503	295.98	292.45	Ningxia
29	2016	青 海	18005.8	8664.4	26757.4	593	0.5163	306.166	286.834	Ningxia
29	2017	青 海	19920.6	9462.3	29168.9	598	0.5307	317.359	280.641	Ningxia
29	2018	青 海	21898	10393.3	31514.5	603	0.5447	328.454	274.546	Ningxia
29	2019	青 海	23897.5	11499.4	33830.3	607.82	0.5552	337.462	270.358	Ningxia
30	2003	宁 夏	3760.04	2043.3	6530.5	580	0.382587	221.9	358.1	Xinjiang
30	2004	宁 夏	4505.17	2320.05	7748.53	588	0.40253	236.687	351.313	Xinjiang
30	2005	宁 夏	4870.11	2508.9	8093.6	596	0.4228	251.989	344.011	Xinjiang
30	2006	宁 夏	5519.5	2760.1	9177.3	604	0.43	259.72	344.28	Xinjiang
30	2007	宁 夏	6560.88	3180.8	10859.3	610	0.4402	268.522	341.478	Xinjiang
30	2008	宁 夏	7842.09	3681.4	12931.5	617.69	0.4498	277.837	339.853	Xinjiang
30	2009	宁 夏	8647.42	4048.3	14024.7	625.2	0.461	288.217	336.983	Xinjiang
30	2010	宁 夏	9785.64	4674.9	15344.5	632.96	0.479	303.188	329.772	Xinjiang
30	2011	宁 夏	11472.5	5410	17578.9	639.45	0.4982	318.574	320.876	Xinjiang
30	2012	宁 夏	13097.3	6180.3	19831.4	647.19	0.5067	327.931	319.259	Xinjiang
30	2013	宁 夏	14681.7	6931	21833.3	654.19	0.5201	340.244	313.946	Xinjiang
30	2014	宁 夏	16384.3	8410	23284.6	661.54	0.5361	354.652	306.888	Xinjiang
30	2015	宁 夏	17992.7	9118.7	25186	667.88	0.5523	368.87	299.01	Xinjiang
30	2016	宁 夏	19590.6	9851.6	27153	675	0.5629	379.957	295.043	Xinjiang
30	2017	宁 夏	21600.1	10737.9	29472.3	682	0.5798	395.424	286.576	Xinjiang
30	2018	宁 夏	23594.1	11707.6	31895.2	688	0.5888	405.094	282.906	Xinjiang
30	2019	宁 夏	25710.4	12858.4	34328.5	694.66	0.5986	415.823	278.837	Xinjiang
31	2003	新 疆	3921.4	2106.2	7173.5	1934	0.358217	692.793	1241.21
31	2004	新 疆	4418.2	2244.93	8201.82	1963	0.364833	716.167	1246.83
31	2005	新 疆	4528.42	2482.2	7990.2	2010	0.3715	746.715	1263.28
31	2006	新 疆	5064.54	2737.3	8871.3	2050	0.3794	777.77	1272.23
31	2007	新 疆	5974.55	3183	10313.4	2095	0.3915	820.192	1274.81
31	2008	新 疆	6646.03	3502.9	11432.1	2130.81	0.3964	844.653	1286.16
31	2009	新 疆	7220.3	3883.1	12257.5	2158.63	0.3985	860.214	1298.42
31	2010	新 疆	8514.07	4642.7	13643.8	2185	0.4301	939.769	1245.23
31	2011	新 疆	9827.29	5442.2	15513.6	2208.71	0.4354	961.672	1247.04
31	2012	新 疆	11463.3	6393.7	17920.7	2232.78	0.4398	981.977	1250.8
31	2013	新 疆	12889.6	7296.5	19873.8	2264.3	0.4447	1006.93	1257.37
31	2014	新 疆	15399.4	8723.8	23214	2298.47	0.4607	1058.91	1239.56
31	2015	新 疆	17383.2	9425.1	26274.7	2359.73	0.4723	1114.5	1245.23
31	2016	新 疆	19021.7	10183.2	28463.4	2398	0.4835	1159.43	1238.57
31	2017	新 疆	20787.7	11045.3	30774.8	2445	0.4938	1207.34	1237.66
31	2018	新 疆	22558.2	11974.5	32763.5	2487	0.5091	1266.13	1220.87
31	2019	新 疆	24295.5	13121.7	34663.7	2523.22	0.5187	1308.79	1214.43

## Sheet: Sheet3
		地 区	Wage of employed persons in agriculture, forestry, animal husbandry and fishery sector (RMB)	Wage of employed persons in mining sector (RMB)	Wage of employed persons in manufacturing sector (RMB)	Wage of employed persons in production and supply of wlectricity, heat, gas and water sector (RMB)	Wage of employed persons in construction sector (RMB)	Wage of employed persons in wholesale and retail trades sector (RMB)	Wage of employed persons in transport, storage and post sector (RMB)	Wage of employed persons in hotels and catering services sector (RMB)	Wage of employed persons in information transmission, software and information technology sector (RMB)	Wage of employed persons in financial intermediation sector (RMB)	Wage of employed persons in real estate sector (RMB)	Wage of employed persons in leasiong and business services sector (RMB)	Wage of employed persons in scientific research and technical services sector (RMB)	Wage of employed persons in management of water conservancy, environment and public sector (RMB)	Wage of employed persons in services to households, repair and other services sector (RMB)	Wage of employed persons in education sector (RMB)	Wage of employed persons in health and social service sector (RMB)	Wage of employed persons in culture, sports and entertainment sector (RMB)	Wage of employed persons in public Management, social security and social organization sector (RMB)
2003	1	北 京	15034	18858	20059	37112	16730	23088	19977	16530	53010	61713	26064	25742	34898	22357	17433	28565	34173	35006	30279
2004	1	北 京	14679	20392	22338	41854	20606	27264	24628	17965	57412	80785	27675	26438	41255	25609	16735	32625	39678	45130	38038
2005	1	北 京	16025	23774	24958	49776	23300	32109	27655	19926	71544	92764	29811	31699	45661	26575	18159	36447	42925	43617	47277
2006	1	北 京	19147	29887	29619	55727	26538	38446	33687	21698	83394	88408	31180	42522	50853	28427	19428	40856	46495	47028	45682
2007	1	北 京	22154	40213	33964	60679	31668	47971	38426	24321	77463	97320	36921	46290	62230	32058	23521	46503	52698	56980	52668
2008	1	北 京	26114	60057	39076	72195	37950	57768	45285	28379	96963	135192	42923	58327	71895	37207	24522	52952	60199	65056	57460
2009	1	北 京	27020	57031	41595	77875	41981	57948	46087	28759	100794	143187	44256	56647	77632	37183	25006	55420	63081	67881	53529
2010	1	北 京	29889	68514	48298	85178	46421	64150	51342	31978	105560	164643	50814	63794	88018	41376	27625	65150	70182	76415	55680
2011	1	北 京	34110	74247	56742	83059	52455	70711	59540	37830	116755	172621	57579	83007	97658	47630	34498	74161	82308	92617	66038
2012	1	北 京	39334	78381	64235	91768	61579	78945	65986	42016	130154	184612	64295	92736	106604	52647	38838	83566	97480	105785	70280
2013	1	北 京	48352	82623	72915	99743	68501	86715	72006	45280	136599	206110	72828	99511	113206	57563	43754	87820	109940	112707	73563
2014	1	北 京	49478	90402	80418	112136	77359	91976	78183	48870	148828	225482	79280	106540	124123	64725	45776	99337	125273	121094	76226
2015	1	北 京	50797	88360	88934	129350	82251	94542	81695	51955	159486	248320	85247	109031	132339	72666	48613	111417	139176	130134	91030
2016	1	北 京	51941	91017	97600	134474	89464	98863	90682	54814	170531	239085	92832	119151	139990	76948	52025	120573	147903	139087	101999
2017	1	北 京	55218	101975	106835	148142	99718	107731	97567	56325	183183	253637	97369	123966	150611	87538	55509	143215	169191	150810	124864
2018	1	北 京	59015	123959	121299	160386	114631	123713	107828	58156	205834	266921	101346	127507	170139	94369	57182	161029	187390	173632	140310
2019	1	北 京	93835	134956	138312	176707	127711	150238	123277	60870	234121	256979	110044	148567	196767	107790	81465	181240	208481	205405	159193
2003	2	天 津	13257	23605	16179	26085	19609	15606	23748	12430	33785	26295	21253	13514	24545	17325	14492	19226	20426	19838	21363
2004	2	天 津	15450	28193	18431	36691	22412	18992	27305	14058	38257	31454	21545	16717	33134	19173	15467	22582	23958	23067	24358
2005	2	天 津	15954	29571	21183	48417	26777	20603	31836	15861	40569	46874	26727	17898	38973	21113	18648	25268	27435	25892	28544
2006	2	天 津	17975	34097	24354	53764	30613	22677	34260	15424	40591	49810	24184	15810	41473	22215	14775	28752	28959	28349	30294
2007	2	天 津	23040	41361	29341	63291	34729	26541	39554	17789	49220	60294	30193	20017	49896	26115	15428	34707	35224	37794	40286
2008	2	天 津	28373	52659	34095	72031	41101	30968	45725	20385	54490	69862	37002	22948	60819	31899	21305	44226	43841	43146	52603
2009	2	天 津	31834	57508	36495	71632	44374	32671	48453	21067	59022	74068	40945	26377	67825	36742	20992	56700	49175	49221	57443
2010	2	天 津	40221	59897	42482	82607	53686	44710	55912	22742	73276	89166	47385	28880	80485	44067	23529	66285	60149	54182	67714
2011	2	天 津	46948	74009	49023	86265	43161	48772	64805	25290	74804	97006	120379	34266	91848	48688	26054	70240	67192	59627	71673
2012	2	天 津	52939	77244	56786	93283	49156	51282	75420	32183	87458	104335	65766	52667	102653	56593	25518	75395	79513	64602	73850
2013	2	天 津	55191	82111	63093	101131	54095	56137	82315	33048	102922	118448	67872	63436	102610	62405	30517	80673	86807	67310	76626
2014	2	天 津	62672	98238	64864	107275	59019	61764	84736	36138	116902	118263	75052	72255	113548	70314	34200	90983	96200	77689	84998
2015	2	天 津	68883	105647	71931	116003	64141	66710	89389	39538	134331	112059	76842	75266	123312	77459	39631	97847	105452	87264	95834
2016	2	天 津	68864	94379	73550	125996	67943	75098	91615	43403	137440	117489	84337	83380	128067	82499	41777	115539	115367	111368	110749
2017	2	天 津	74975	101665	79191	133633	70649	76632	96663	46391	151778	113813	89207	75179	137969	95341	44928	127961	128833	116655	128855
2018	2	天 津	74307	124914	87229	147966	75579	80849	97976	40974	128696	128870	86963	76138	153209	93127	44986	138011	138100	131631	124602
2019	2	天 津	64859	140055	93132	156392	90037	87672	103289	37875	144510	138234	89958	74780	172063	96918	60854	139432	148016	165288	129927
2003	3	河 北	4858	14057	10139	17582	9098	6824	12777	7900	23494	15237	10832	9225	16699	10021	14647	11100	11681	12012	11954
2004	3	河 北	5366	17934	11897	19994	10462	7654	14289	8514	23482	17877	12022	10426	18918	10871	17386	12653	13435	13399	13272
2005	3	河 北	5988	21913	13087	22974	11815	8523	16183	9324	27176	21750	14127	11962	22403	12011	18753	14513	15266	14591	14776
2006	3	河 北	6622	25719	14985	26282	13249	9539	17510	10398	26628	22699	15593	12474	25895	12929	22506	16060	16829	15290	15908
2007	3	河 北	7677	30703	17195	32358	15112	10724	21953	11433	28605	27390	18304	14131	29277	14698	23838	20214	19920	17689	20147
2008	3	河 北	9618	37249	21037	36434	18210	13465	25666	13780	32113	32649	21868	17300	36825	18069	29992	25592	23770	21340	25035
2009	3	河 北	11330	42784	23870	39846	20066	16738	29787	15441	36830	36989	24945	18750	42809	20093	34617	29605	27678	24762	28395
2010	3	河 北	12423	49514	27894	45478	23159	19780	33141	17314	38840	45176	27894	21159	49179	21663	34932	33588	30645	26208	29923
2011	3	河 北	12878	57900	32695	51664	27425	24449	38548	21791	46842	53190	30640	23881	59318	23982	40374	36128	33150	30311	31284
2012	3	河 北	13669	62061	36613	58708	31241	28151	45696	25645	50628	60304	35670	26686	58892	27314	41946	38701	37427	33453	33498
2013	3	河 北	13859	61544	40169	63938	34670	32091	46599	27464	69718	65547	38716	37884	61114	27926	28024	41021	39382	36423	35150
2014	3	河 北	15559	59363	43950	69985	37027	35398	52425	28971	83469	73130	39631	38724	63937	30674	31614	44646	43843	39789	38656
2015	3	河 北	19685	54725	47678	75489	39182	37909	57090	32836	93983	74795	42697	40070	69744	36264	33368	57273	51967	45994	48923
2016	3	河 北	21876	55184	50970	77162	42662	40256	59527	34357	109196	75708	46867	39232	74020	40292	35634	63967	58566	51507	56101
2017	3	河 北	23327	60268	58479	84590	51771	46280	67700	38465	84317	77845	57196	45988	81947	42366	36813	70456	64190	58934	61994
2018	3	河 北	23402	75134	65363	91575	55152	50568	75091	42478	86861	77491	59580	51738	93052	43298	39223	77715	71854	66123	66433
2019	3	河 北	27537	82243	68754	100405	60547	56341	87130	46577	94052	86168	62631	52085	90917	44546	41923	79379	74784	71743	68850
2003	4	山 西	7736	12871	8944	12468	9169	6178	13894	6250	17953	15103	9472	8353	13109	7969	6714	11648	10915	10826	11239
2004	4	山 西	8655	17220	10612	14415	10466	7220	16203	7162	21953	17937	10349	10156	15755	9436	6785	13375	12142	12386	12784
2005	4	山 西	10406	22403	12820	18677	12420	8319	18935	9396	20705	20965	10925	10796	17337	10772	11368	15149	13866	15247	14741
2006	4	山 西	11806	26925	14764	21918	14349	9513	20950	8797	21220	22080	11999	12087	19008	11973	13950	17478	15482	17130	16495
2007	4	山 西	13841	30893	16988	27844	16669	12054	25195	10515	27756	27532	13622	14078	23433	13350	13413	20412	17969	18741	19799
2008	4	山 西	16566	37851	20268	33920	19744	13835	29422	11934	26204	31352	15919	15918	27614	14378	15395	24061	20590	21277	24100
2009	4	山 西	17957	42197	21806	37103	21912	16073	31851	13455	30912	35447	15938	17599	30334	15831	18678	27573	22302	23631	25275
2010	4	山 西	20570	52252	25350	43023	25936	18890	37888	15064	33916	47037	17847	19819	33847	16657	20623	30620	24049	24927	27751
2011	4	山 西	23573	64539	30182	50878	30399	23613	44355	17239	35697	55125	21937	24091	37549	19454	22575	35039	28405	29377	30012
2012	4	山 西	25293	71541	34941	57327	36538	30325	49792	29378	38562	62678	29753	26892	42554	21259	22565	38425	32386	33307	32672
2013	4	山 西	29661	68633	36683	63435	36719	32802	54751	22924	49299	67729	32837	31191	50793	22506	27476	41695	35993	36348	37173
2014	4	山 西	34230	65904	39868	68142	40504	37693	60187	24082	56094	74778	37991	34270	51919	24342	30467	45722	39653	40133	40502
2015	4	山 西	41729	58198	41093	72867	42494	37986	64505	26710	60160	75620	40538	36611	58390	28074	36933	58974	48349	47387	49859
2016	4	山 西	45871	55921	42314	73827	46632	38854	68837	28630	64686	75683	42950	37776	60446	29411	36307	62548	51145	49041	54484
2017	4	山 西	51930	65334	48800	77582	50384	43710	76471	31030	77870	80556	47814	42939	67918	30961	38547	67798	56466	53992	59443
2018	4	山 西	52156	73380	53209	81956	54673	50456	87933	33394	83095	84811	53859	46401	78056	33560	45259	72783	64300	57050	63096
2019	4	山 西	45934	81324	57348	87122	60309	59115	93627	35024	84761	80289	53620	49040	79001	35325	47450	70640	71111	58952	63262
2003	5	内蒙古	6829	9760	10050	17942	8297	7867	13604	7516	17367	14060	10858	12511	14060	10235	7257	13383	13353	13664	13886
2004	5	内蒙古	7672	12627	11438	23852	9677	9609	15917	9462	20568	17228	12438	13595	15889	10848	8347	15578	15361	16282	16316
2005	5	内蒙古	8587	16184	14497	30661	11574	11596	19124	14215	24579	20812	13397	16763	19109	13062	10239	18049	17633	19359	18440
2006	5	内蒙古	10148	21582	15678	32959	13290	13631	22570	12004	25962	23521	15145	17398	23721	14624	19671	21289	20414	20776	20336
2007	5	内蒙古	11574	27317	19127	36701	15438	15051	26108	13384	26459	28643	17735	19395	28080	18272	22495	25397	24092	23702	24354
2008	5	内蒙古	13189	32123	22352	40921	17679	18470	31163	16108	29325	35824	20480	22445	31047	20209	27723	30434	28880	27861	29791
2009	5	内蒙古	15017	37156	25603	44207	23219	21699	34578	18227	32557	40945	23424	26737	35184	24784	30494	37305	33610	32545	34825
2010	5	内蒙古	18292	42248	30024	48860	24946	24342	39991	21335	37530	45588	26475	31840	40047	27729	39550	43397	38375	37805	40338
2011	5	内蒙古	22939	51159	36330	52587	28612	28651	47775	25385	40857	55530	33144	37799	45750	31597	43476	50992	44996	44326	47346
2012	5	内蒙古	26573	59315	41503	59148	33070	37396	53487	30529	45675	63880	39512	41541	48062	36403	32844	56242	51009	49701	51547
2013	5	内蒙古	29501	69278	45338	64325	37575	40609	57041	31958	54434	69426	39964	44301	56780	38722	36346	61981	56148	52312	55697
2014	5	内蒙古	32463	68787	48582	69403	41489	42902	62134	34050	61123	73866	40512	44270	60716	39460	38733	63758	58738	54827	56832
2015	5	内蒙古	35597	69067	50655	73717	41132	45942	64232	36285	65420	76093	42023	45702	62973	41682	40348	71528	62665	60979	62272
2016	5	内蒙古	37569	72654	53670	78757	42968	48831	67389	37499	67444	78570	43850	45155	65192	41715	38082	77184	68009	65311	67867
2017	5	内蒙古	40422	85135	60655	83080	49456	52288	74613	39620	74162	81065	45374	48914	71086	44472	38380	81643	72473	69346	72167
2018	5	内蒙古	43644	107498	69879	94454	51833	61651	82016	44045	84163	88289	46733	53124	80623	45647	46717	85643	76424	71777	74210
2019	5	内蒙古	54445	120107	75457	101391	54811	66035	91513	44381	91272	88020	50721	57182	88303	52386	45347	88682	80379	78895	76524
2003	6	辽 宁	4990	13756	12206	18559	9660	10466	14688	10123	35486	20171	13394	11915	17600	10623	9804	13704	14073	15327	14650
2004	6	辽 宁	5637	16596	14099	21256	11235	12436	16579	11235	36976	24198	14659	13111	19441	11538	11461	15787	15584	16437	16570
2005	6	辽 宁	6162	19655	16241	24025	12743	14213	19521	12360	38283	28542	15343	15167	23775	12697	13274	18583	18097	19771	20053
2006	6	辽 宁	6619	23900	18515	26112	15194	16691	22219	13683	39360	28549	16635	12918	26377	13672	15524	20297	20355	22095	21414
2007	6	辽 宁	7354	27349	21572	31145	17118	19242	24998	14222	41454	34247	18814	14504	31480	15352	15919	26039	23512	24959	27519
2008	6	辽 宁	7517	36040	25669	34361	20891	22694	28745	16624	49237	39968	22408	17420	37816	18975	18338	31762	27657	29565	31561
2009	6	辽 宁	8832	35463	28218	36322	24399	25715	32639	18331	53818	45038	25727	21352	42903	23254	21408	38221	32341	34781	33998
2010	6	辽 宁	10040	41238	32126	42658	27535	28616	38451	21613	56013	53676	28147	24598	48030	24753	25101	41656	36638	36478	36941
2011	6	辽 宁	11478	49014	36417	46134	30332	31952	43728	26046	60766	60859	32183	28859	54741	26725	28378	44795	40713	40272	39177
2012	6	辽 宁	12050	54082	39507	51600	34379	35462	51268	30494	66914	69453	36022	30353	55447	27866	32718	47968	44874	43515	41363
2013	6	辽 宁	13058	56411	45416	55207	38992	40569	55620	33121	72837	73851	44905	34439	59624	29565	34562	50032	48430	46818	42162
2014	6	辽 宁	12976	58246	49585	59557	40115	43444	59951	37156	78751	77949	46517	37387	62443	29722	34864	51281	50054	46833	43248
2015	6	辽 宁	14360	56332	51623	65747	42319	45681	65044	37435	83665	83537	49813	41209	66150	32406	36726	61114	56455	49918	50389
2016	6	辽 宁	15497	55363	56546	69357	43585	47382	66657	38871	88995	80323	53808	43422	70180	34416	39022	66890	62230	52202	55348
2017	6	辽 宁	17027	63317	61816	69704	46908	50767	71405	43026	91990	85433	56945	47523	74469	36594	41686	73080	68716	55137	59802
2018	6	辽 宁	17745	71361	69256	75515	55093	56331	77054	47145	99280	87377	62574	49663	86988	42023	51329	76151	71596	65567	64605
2019	6	辽 宁	17327	79183	73247	78854	59362	61051	85944	40960	106814	90944	63703	51148	98090	42631	45855	83173	79344	68134	69647
2003	7	吉 林	5503	11859	11129	15206	8716	6935	10909	8357	21777	15559	11596	11824	14140	8758	12335	12950	11771	11542	12274
2004	7	吉 林	5788	15777	13103	16779	9488	7241	11445	8622	24806	17493	12518	12829	14980	9685	11454	14323	12958	12253	13440
2005	7	吉 林	6397	19139	14503	19581	10608	10123	15498	10109	25690	20381	13212	16679	18252	9900	11396	15684	14109	14300	15456
2006	7	吉 林	7866	22018	16643	21489	11801	12877	17180	11466	25792	21709	14626	16750	19956	10964	14479	17875	15412	15710	17281
2007	7	吉 林	9402	24294	21004	25604	14177	15135	20111	12726	29933	27335	16795	20118	26013	12972	12995	23363	19908	19468	22594
2008	7	吉 林	12039	29163	24036	28807	16017	17642	23845	14920	29854	30675	18539	22500	30112	14585	13479	26372	22555	21842	24427
2009	7	吉 林	13636	31757	26119	29419	19408	20018	26539	14881	30803	36473	21227	23041	33927	15926	16190	29305	25948	25159	27164
2010	7	吉 林	15220	33584	31153	33044	21165	22999	30422	17594	33772	43174	23153	23918	38732	18375	17511	31548	28476	26684	29247
2011	7	吉 林	19467	35981	35704	35601	26578	27082	38722	21901	38956	54512	27748	31161	46102	20112	27373	36211	33065	30467	31765
2012	7	吉 林	21126	40363	40216	41850	31185	31326	45290	25042	44257	59995	33489	36187	49835	21804	31513	40918	41304	34017	36945
2013	7	吉 林	23249	49884	46613	53553	35730	34569	48587	27189	49288	66938	38598	33392	49805	24552	28343	44988	44311	37367	38028
2014	7	吉 林	25610	53814	52057	59153	37119	37522	54654	30091	56439	71894	39308	36692	53062	27992	32385	47658	46127	40313	40366
2015	7	吉 林	29744	51885	54452	66192	40803	40854	58488	32178	63448	75102	44444	40714	59844	31578	31535	58835	53409	50810	48061
2016	7	吉 林	33042	51883	58250	70925	44968	43419	62053	34173	64923	81958	44670	45219	62900	33912	32797	65436	63307	55335	54321
2017	7	吉 林	36826	56079	65067	75680	46222	47867	67910	38370	72064	87154	45979	46975	66857	37110	36572	71526	67048	57349	62216
2018	7	吉 林	38397	66172	75058	86102	48961	52331	75599	40422	82963	92873	48165	51909	75661	41988	42265	75836	73939	63352	68069
2019	7	吉 林	41750	71210	82545	89574	54213	56243	77879	42157	82785	88059	52865	53882	82234	40285	40297	82399	78940	65789	71691
2003	8	黑龙江	5403	13466	10063	15702	10641	8400	12784	8528	26318	18407	11142	9069	14084	9898	6330	13808	13066	13977	14097
2004	8	黑龙江	5839	15084	11240	18140	12151	9577	13831	10170	28554	20473	12693	10100	19336	10738	11754	16151	15169	15868	15491
2005	8	黑龙江	6444	18422	13129	20347	13458	11912	16385	11589	31427	24066	14113	12661	20862	10651	13062	17304	16568	16599	17880
2006	8	黑龙江	7093	21120	14998	21004	15926	14222	18936	13665	32034	24362	14214	13304	21992	10996	13653	19389	18262	17629	19289
2007	8	黑龙江	8383	24144	17528	24826	17059	15681	21222	14724	33781	28110	16166	15700	25658	13046	15613	24674	22336	22033	23428
2008	8	黑龙江	10017	27869	21093	28481	19067	19052	24833	17790	35752	33742	17980	17961	34096	14295	21807	27495	25782	25543	27619
2009	8	黑龙江	11079	33417	23894	32767	20610	21693	28074	19778	37803	37056	20254	21157	42405	16502	25848	31400	29432	28140	30699
2010	8	黑龙江	12916	39793	26764	36613	22904	25702	31501	20804	40416	42537	21881	28238	39938	18663	29803	34630	32095	29827	31568
2011	8	黑龙江	15069	44726	31197	40677	26155	28649	37930	23462	45331	49143	26558	32841	47545	20115	35488	37095	36158	32918	34016
2012	8	黑龙江	20830	49530	36787	46604	32089	33028	44616	30504	50042	55849	31379	36599	57107	23666	42918	39994	39712	36117	36472
2013	8	黑龙江	23824	56637	39691	54211	36776	38401	50797	36746	55854	57390	36885	39156	60631	27025	49101	43527	43211	39644	39325
2014	8	黑龙江	25816	56472	43254	58085	37389	41602	56406	39387	59055	58112	40002	39918	62073	28993	52333	49503	47659	43083	43143
2015	8	黑龙江	28592	54707	45422	62714	37948	44615	58601	42095	64070	65140	44447	44945	66168	32980	50275	62673	55776	50931	53007
2016	8	黑龙江	28782	59875	49775	64919	39922	48576	62977	44807	62707	64737	45376	48066	68514	35519	55411	68288	62122	55056	59837
2017	8	黑龙江	30638	68926	55497	68215	42200	50907	68747	48778	65370	66790	46693	56493	73978	36282	58569	72656	66627	58391	63684
2018	8	黑龙江	30926	79255	62891	72319	48414	52525	74935	50404	64022	66942	48982	67108	82607	38571	60090	77787	71719	62263	69260
2019	8	黑龙江	31754	90004	69173	80297	52767	60286	83090	40192	71471	69860	51173	70901	94140	41454	65339	84227	73454	63598	71516
2003	9	上 海	15450	44197	25477	32330	24591	25038	25903	21168	62821	42544	32802	22990	30928	24850	18542	26601	28531	32090	30748
2004	9	上 海	17094	51226	27456	34926	29211	28288	29398	24411	58874	46269	33570	26215	36232	27720	19947	29111	31219	35287	33420
2005	9	上 海	19390	68590	29835	40965	35034	32385	34354	26939	69572	54390	42309	30589	43200	31124	20338	32489	35511	40574	36765
2006	9	上 海	22271	69929	34206	49670	37379	30174	34915	24255	74360	66016	33461	32351	47822	29508	20762	37819	41849	43701	41018
2007	9	上 海	26646	58727	37975	62211	46188	38402	43776	27582	83317	92914	37436	39673	61501	33721	24712	45833	51297	51651	48285
2008	9	上 海	29615	61381	42311	72262	55114	49606	47143	28323	91097	116636	45459	43996	75642	40055	17975	56221	62764	55888	58721
2009	9	上 海	38093	59946	46672	83958	62308	52553	49847	29564	101367	134581	45903	53146	76108	41240	30875	61763	66826	62422	65919
2010	9	上 海	39575	62356	52163	93049	69051	61509	58405	32815	115524	155763	48306	60905	83338	44376	35226	69738	73470	68533	73073
2011	9	上 海	45858	95958	61491	101211	59603	82882	65455	38462	120196	170086	62340	76802	120307	48431	43413	82315	92619	81409	89882
2012	9	上 海	50484	103785	65032	113596	51894	91658	71062	40916	127888	174682	69810	82287	129633	52200	43525	85662	103905	83701	90622
2013	9	上 海	55329	113338	71305	125279	65134	100692	77999	45169	153989	181909	67231	129430	141766	59119	54276	89333	107891	90056	91983
2014	9	上 海	57514	114879	79795	143613	73620	107673	88929	49418	170174	195718	72185	135268	152258	63973	59289	96165	113142	96303	95569
2015	9	上 海	62828	122414	86536	153467	80941	117396	98996	52999	183365	208658	82274	145659	158906	73137	62576	100865	117092	117099	100767
2016	9	上 海	67322	142716	96813	163212	88034	127489	108905	56933	200657	226500	91814	151937	163297	78432	66280	106941	125181	129644	107325
2017	9	上 海	69903	144454	105733	174252	96580	139627	116763	60153	212063	247568	98474	156621	176383	86441	67013	111090	138074	145257	118964
2018	9	上 海	71879	129162	115888	182129	110117	153932	125216	57848	232522	257723	103812	163418	191018	92165	74539	114749	150648	165573	129492
2019	9	上 海	60642	271188	125664	204287	114798	157242	134369	60022	237405	258161	109697	161663	184920	95860	71832	136449	178711	161284	150631
2003	10	江 苏	7399	14530	13512	25000	13167	11452	17031	11869	32533	24173	16897	15931	23744	14964	16735	16549	18729	19550	21498
2004	10	江 苏	8030	18059	15146	29653	14697	14027	19781	13595	36754	29256	19033	17101	28124	16933	18866	18850	21884	23348	25400
2005	10	江 苏	9064	21637	16937	34679	16118	16557	22280	15181	41445	35363	24664	19320	32640	18956	22411	21807	24884	28137	31328
2006	10	江 苏	10181	26385	19647	39066	18260	19163	24811	16577	40801	36760	27991	21928	36220	20234	20691	25352	28718	31667	34765
2007	10	江 苏	12030	29877	22510	45922	19928	21920	27887	18409	44754	44417	31207	24076	42391	23549	23387	30488	32792	36773	39758
2008	10	江 苏	14728	33111	25688	53702	23154	25458	30227	20557	45010	52051	34455	25442	48834	26865	25993	35205	37404	40249	48257
2009	10	江 苏	17904	40115	27765	59577	26549	28985	34015	21488	48004	60164	38012	27413	53849	28323	28502	42158	41479	44856	54711
2010	10	江 苏	20736	41573	32209	66131	29679	31451	38584	24029	58902	71115	43305	29776	60437	30940	34349	49340	46337	48360	58861
2011	10	江 苏	23319	47936	37720	74137	33549	37256	44266	27236	72919	86520	48591	33643	70982	35896	41160	54499	53117	52576	64229
2012	10	江 苏	26300	50963	42641	80246	37619	40887	49167	30586	80340	92156	53489	38421	76548	40233	45981	59912	61735	58582	70908
2013	10	江 苏	29334	58932	53980	96912	49693	52495	56782	31574	94616	105289	56357	48648	77708	44635	45774	66056	68571	63059	73532
2014	10	江 苏	32347	60621	58409	104454	51856	56749	61473	34786	102341	111934	61740	52353	81571	49111	49159	70130	73779	71787	76028
2015	10	江 苏	33957	60418	62731	113893	55598	63185	66981	42391	117249	119198	66686	54677	91213	54062	54116	78115	81693	77468	82372
2016	10	江 苏	37953	62330	66994	116629	58172	67127	71773	45013	130501	122648	72680	60258	100375	60723	57905	88282	92202	84242	96402
2017	10	江 苏	39463	74833	72235	123450	62668	72843	77476	47395	143002	126541	75084	62893	112285	66997	63066	101430	104414	91968	111840
2018	10	江 苏	43470	88012	79022	136619	64663	81009	86323	49527	144766	136975	81329	61768	123839	70150	66169	113637	116589	107119	126578
2019	10	江 苏	51095	94090	86366	142745	69783	88790	98468	51977	147409	162687	83674	71335	128141	78242	64189	124443	128624	108370	140128
2003	11	浙 江	16367	13994	14267	34733	15982	20288	22718	13516	44263	31578	22692	20137	28627	18908	19269	25677	29366	27060	29785
2004	11	浙 江	20916	15646	14722	41370	16915	22968	26191	14788	47690	41996	24985	21403	33258	21657	22074	31835	35360	33878	36543
2005	11	浙 江	24041	18756	16446	46311	18837	26150	29218	15973	54870	50972	29200	22939	37031	24368	23834	36644	39757	37564	44413
2006	11	浙 江	24760	21318	18507	62318	20415	27070	31652	17331	52141	53667	29144	23308	39682	24377	24288	38638	41483	39896	45876
2007	11	浙 江	28182	23066	20970	59108	22791	29730	36138	19962	59844	65882	32540	27306	44602	27383	30225	44495	46595	44028	51925
2008	11	浙 江	30338	26469	23816	64424	25056	33442	39596	21301	64703	77773	37291	28778	50491	28861	30798	48815	50830	47433	55527
2009	11	浙 江	32969	26292	25429	68464	26580	35705	43041	22456	71664	84714	39558	29627	53648	30583	29586	58993	56499	49956	59339
2010	11	浙 江	34088	28330	29671	77180	28595	39901	48359	24679	77125	98135	42290	32450	56621	32462	35127	63693	62508	56313	64667
2011	11	浙 江	37570	35070	35363	82886	31590	45488	54242	29056	83493	112458	48153	39205	64799	36731	39230	66361	70101	61695	69421
2012	11	浙 江	41718	45015	40464	85668	36901	50256	57737	32827	96741	117291	52212	47391	67761	41192	42613	70174	78385	66915	73676
2013	11	浙 江	47000	46043	45895	93793	43251	54908	64156	35829	106946	124711	56607	52596	82352	46195	44727	74700	86220	73090	80118
2014	11	浙 江	50469	49626	51295	103547	46149	60533	70156	40210	114908	130337	61529	57268	90368	50161	46508	80038	95067	78311	85414
2015	11	浙 江	53661	49149	55370	107952	48279	64327	75002	42540	126266	130734	66336	63241	98452	55026	48471	90882	104369	87177	93306
2016	11	浙 江	61992	48428	60390	122323	50350	71347	83408	45713	145657	130813	71088	65365	99537	61104	58157	102888	117116	97257	108789
2017	11	浙 江	65914	57590	65173	127722	51879	77636	87811	47339	165532	132411	74546	69885	120521	66032	63285	114415	131742	109932	124495
2018	11	浙 江	69217	72427	73055	135779	56265	87315	94562	51433	190839	142951	77868	73894	142811	73390	68146	123681	143804	114343	136641
2019	11	浙 江	79112	87460	80483	129352	61899	94838	96986	54896	223499	151017	84757	79585	154576	82758	69723	127038	154261	116297	148439
2003	12	安 徽	5872	12699	9701	13563	8531	6163	9473	7302	19158	14475	11128	8483	13348	9328	7600	11436	11845	11167	12915
2004	12	安 徽	6706	18680	11595	15647	9625	7748	11445	9001	20342	16636	11609	8465	15874	11093	11246	13597	13546	14058	15065
2005	12	安 徽	7812	24473	13651	18269	11425	9889	12999	10159	23751	20099	13964	14877	18432	12310	13981	15317	15608	14978	17020
2006	12	安 徽	8685	29537	15736	21491	14245	11318	15065	11344	23113	22642	16990	15453	20970	12559	14919	17375	17301	17807	18282
2007	12	安 徽	10857	36059	18937	26457	17760	13913	17768	12990	27068	27193	19046	16695	23848	15175	17463	22635	21491	20900	23453
2008	12	安 徽	12473	43838	22509	31002	20539	16965	22247	14321	28550	32652	22145	20884	28850	16771	20156	25400	25104	22793	28675
2009	12	安 徽	13437	48404	24960	35680	24075	23112	25098	16857	31275	36891	23285	26130	32019	18423	19180	28230	27640	24416	30574
2010	12	安 徽	16945	57314	29238	40467	28046	26935	29408	18188	36316	46561	27250	28122	36068	20949	23258	32445	31811	28435	33622
2011	12	安 徽	19443	65805	36355	47113	35319	30234	36103	22511	41378	52780	32958	37525	43177	25330	27929	37721	38420	34353	37899
2012	12	安 徽	22845	70568	42393	55599	39920	34988	42787	26406	47492	59416	39354	36804	51618	29700	35602	42258	44178	39138	43086
2013	12	安 徽	24302	70893	43980	72363	44710	39255	47235	28563	53755	65920	46737	41054	60816	32453	37074	46183	50908	42787	46164
2014	12	安 徽	27185	69636	48259	77120	47632	41863	50271	29652	62501	72215	50362	40853	63084	35989	38091	48487	54468	44211	49012
2015	12	安 徽	31084	61900	50945	81692	48895	45751	56659	33629	67922	77300	54252	47458	69129	40802	41690	59088	63695	52272	57083
2016	12	安 徽	34264	57981	54614	89223	51399	49999	61038	34897	72390	76724	60543	47667	73035	46332	44353	64322	71104	55773	63744
2017	12	安 徽	36132	73210	59089	98235	52814	53081	65444	36966	77304	79039	61085	51665	83571	53681	48500	72792	83435	62014	74487
2018	12	安 徽	41274	90747	66006	104472	60785	59766	72012	40071	84256	84882	68033	56024	93035	62816	45070	98697	96596	68973	87207
2019	12	安 徽	46917	101890	70475	113122	63074	62075	80896	45613	91580	89847	68129	62201	95977	50926	49472	97702	105423	72342	93753
2003	13	福 建	7781	10858	12217	20562	13779	13375	18181	10333	33158	26245	16582	14538	19913	12948	15009	15029	16589	16919	16567
2004	13	福 建	8860	13577	13300	22842	14381	15094	20424	11455	37500	29948	17542	16393	21783	14067	15952	16698	19071	18719	18617
2005	13	福 建	9828	16664	14229	26695	16161	16491	22623	12570	40326	34993	18944	16986	24346	16433	15707	19111	21733	21018	21616
2006	13	福 建	10717	18055	16297	29453	19494	18535	25189	14432	39147	37393	21860	19931	27159	17476	17669	21771	23374	24453	24308
2007	13	福 建	12500	20637	18391	35946	21205	22044	29451	16118	42125	46441	24695	20811	34677	21719	19565	26158	28331	27670	28503
2008	13	福 建	14496	23797	20678	39701	24251	24676	32801	17501	46338	56965	30428	23244	36583	22680	22648	31361	32893	29704	34144
2009	13	福 建	15790	26014	22631	42466	26029	27927	35263	18681	52776	61181	31581	22736	37348	24092	27430	36952	36226	31419	39727
2010	13	福 建	18041	29328	26627	50529	30138	32850	39741	22268	59117	70532	36917	24511	41592	26824	33977	40550	40844	35654	42000
2011	13	福 建	22021	33539	33341	57728	36770	37998	45761	26577	59763	84296	43969	32928	49201	31336	35808	46832	50672	41715	47138
2012	13	福 建	24516	36341	38725	66938	42743	44404	52750	30883	67917	94708	50397	38431	55947	35842	34320	52282	57525	47017	53850
2013	13	福 建	26205	38110	42820	71123	44202	45998	55821	33572	74101	101550	52646	49942	63208	37278	38689	56378	64544	53391	57022
2014	13	福 建	28340	43793	46892	77293	50028	51458	61115	36200	78734	107826	57980	49695	64519	43231	44215	59844	72183	57796	60411
2015	13	福 建	32510	44100	50675	80987	50819	54866	65314	39599	84288	108537	62253	51927	76956	46144	46396	69226	80314	61039	68728
2016	13	福 建	35577	44222	54439	88471	53557	57937	71181	39434	93774	108377	65110	56934	79317	51083	48040	75773	87997	67018	76926
2017	13	福 建	40543	48460	59131	93073	56160	61504	77536	41429	98427	109757	69166	62848	91712	59204	49646	84471	96333	73532	89047
2018	13	福 建	43564	56078	64881	110659	61394	69863	86529	44828	107642	116574	74039	61426	103976	60379	59381	94333	110082	82559	100608
2019	13	福 建	51430	61314	71641	119694	64846	82363	90085	46387	124370	116732	81052	62639	118649	62162	66063	96557	119961	84160	106176
2003	14	江 西	5492	9421	9626	12707	9220	7782	14011	8313	16831	15390	9873	10783	12804	8736	8152	10986	12614	11888	11484
2004	14	江 西	6238	10987	10817	14270	10150	9319	15576	9077	18737	18289	10196	11073	14792	9678	9239	12213	13924	12544	12873
2005	14	江 西	7151	13618	11921	17274	11152	10560	17885	9713	21025	21333	12733	11834	16738	11053	9460	14881	16451	15517	14561
2006	14	江 西	8208	15882	13661	19766	12615	12336	20568	10861	20428	22921	13918	13324	20372	12319	11569	16027	18242	19117	16025
2007	14	江 西	9670	17033	15423	24444	15079	14277	23650	12862	26967	26513	17365	15534	22705	14655	13149	19537	22757	21796	19550
2008	14	江 西	12478	20503	17573	27453	16584	18128	27684	13829	25242	29324	18285	15726	25533	15739	17444	22433	24982	23794	22047
2009	14	江 西	15049	24589	21508	30908	20518	20868	31921	15840	26118	33055	21531	16691	28934	16965	20053	26175	25165	27576	25824
2010	14	江 西	16265	27978	25579	37312	25293	24868	38628	18268	32566	38926	25857	21725	30430	19757	22375	29980	31494	30555	29395
2011	14	江 西	19765	36496	31158	43449	29175	29148	46120	21290	37676	47112	33475	32529	37628	21789	29392	34940	37542	32519	34013
2012	14	江 西	20580	39041	39023	46839	34105	32595	51912	22926	44438	53798	38431	37231	39356	28339	27611	41596	38962	43512	39622
2013	14	江 西	26459	41762	39351	51676	38753	39111	54417	26772	57867	70497	37376	37835	47738	40756	31840	45499	48823	44087	40732
2014	14	江 西	26877	42984	42976	56550	42002	42827	58120	30722	56721	71160	45093	40161	55957	41782	42678	48543	53384	44941	46893
2015	14	江 西	32076	41120	46020	62064	46146	45992	62546	33402	60353	76035	49714	41535	66749	37900	44908	55995	61728	53649	54577
2016	14	江 西	35473	42902	49564	62157	50108	47104	66594	35880	71535	83974	53632	45854	74844	42849	51631	63924	70701	61272	64568
2017	14	江 西	37769	49041	53417	70226	52990	50814	70558	37123	73333	84304	56954	49468	80120	46782	51848	70448	78366	64370	75324
2018	14	江 西	42158	55651	60717	77678	57340	57043	79238	41736	82800	91038	58792	56288	89931	47150	48994	76544	87882	72367	80900
2019	14	江 西	47217	60070	64009	85041	60087	62094	87032	44047	88865	95100	65562	61645	97846	43321	50235	80709	96226	80511	86107
2003	15	山 东	8617	17802	10000	17681	10028	8006	16124	9249	24660	19924	14269	12805	17264	11685	11633	13342	15106	16325	13723
2004	15	山 东	9812	21077	11376	19297	11751	9051	18777	10898	29349	23222	15818	13164	19724	12827	13238	15201	17043	18227	15418
2005	15	山 东	12748	24157	13019	22090	13069	11768	21488	12023	34609	28213	16214	15425	23235	15214	24511	18549	20608	21906	19347
2006	15	山 东	14519	27105	15633	25251	15400	13489	24826	13807	35191	28207	19225	17085	26764	15278	25080	21772	22690	24853	21150
2007	15	山 东	16960	30805	18477	29553	18183	15813	27998	15069	38577	35303	22182	19661	31695	18347	27313	27289	26235	30657	25522
2008	15	山 东	19387	36133	21340	33497	20395	18254	31235	17646	37981	40297	24426	24085	36770	21114	31777	31032	30504	36088	29722
2009	15	山 东	21884	40564	23930	37911	23222	21272	34477	19568	44403	46480	27254	26130	40964	22995	29853	34391	33982	37964	32496
2010	15	山 东	24143	46560	27773	42025	25807	23845	39435	21810	50315	53148	29793	28987	45803	25387	32461	38621	38044	41008	35726
2011	15	山 东	28329	53767	32069	45874	31101	28807	46016	25926	52186	61416	32966	35000	52518	28827	45264	41988	43101	43492	39284
2012	15	山 东	31290	57906	36833	52617	33667	32868	50097	29528	60459	72345	38545	39480	53319	31602	45588	46176	47768	48702	42914
2013	15	山 东	39617	62390	41202	58181	40118	39219	55174	37068	74249	80835	44393	46169	56233	37195	38233	51658	54919	56870	48062
2014	15	山 东	40558	63722	45519	63726	44675	41884	60303	37615	77282	89331	49742	51488	63176	39488	40300	58138	60460	62056	53430
2015	15	山 东	51003	61718	48519	70580	47881	44386	66189	39723	81249	90869	52575	56970	70959	42743	42675	73073	70385	71453	65158
2016	15	山 东	56617	65309	52255	74333	52421	47572	70509	42496	84346	93405	57331	59852	78755	45799	44511	81165	78411	77462	74552
2017	15	山 东	63564	72651	57339	88179	56011	51944	76723	44824	89063	94704	59816	62958	85976	48135	46560	87647	84745	81074	80835
2018	15	山 东	65898	82014	63247	97873	59229	56654	79524	45968	98005	97896	65454	64289	93662	48950	47030	94149	88758	84445	85147
2019	15	山 东	66884	96161	69354	107732	66282	63856	90940	48369	101077	95721	69520	72605	103794	46300	49649	98875	100037	87556	92833
2003	16	河 南	6115	14339	9550	14570	9370	7169	12556	7917	19377	16595	11159	10321	14986	9942	9217	10774	11474	10818	11031
2004	16	河 南	6841	17223	10794	18714	10321	8152	13959	9110	19021	17860	11324	11570	15967	10428	9323	12064	12529	12524	11815
2005	16	河 南	7833	21958	12666	19089	12450	9742	17290	10274	22227	21743	13464	13448	19690	11812	10644	14093	14259	13736	13653
2006	16	河 南	9405	26040	14853	21878	14282	11536	19399	11796	22995	24238	15451	15261	22524	13459	15159	17151	17094	17996	16135
2007	16	河 南	11259	31168	17522	26230	16467	13703	22308	13684	26991	29878	18790	17119	25012	17306	15834	22767	21064	20401	21755
2008	16	河 南	13455	37649	20993	31321	19388	16945	26387	16460	27391	34618	21928	21418	28998	20365	16818	26512	25438	23075	25446
2009	16	河 南	15718	41029	23330	33310	21354	19509	28392	18390	32510	38019	26125	21383	33250	22265	21542	29747	28008	25973	26751
2010	16	河 南	17433	46887	25864	37196	24151	22403	31748	20201	35042	41871	28913	24560	36436	24648	23650	33090	31177	28511	28474
2011	16	河 南	20492	52619	30012	40672	28170	26913	37067	24604	38208	47749	34062	28474	39277	27486	25338	36082	35216	31249	30691
2012	16	河 南	24226	55425	33803	44667	31682	31177	43478	27252	44518	57364	36852	30992	45988	29856	29170	39582	38814	35925	33696
2013	16	河 南	25268	51158	33951	53634	33856	33759	44633	27895	47671	62835	37594	34965	47717	31679	27878	42099	43526	36555	36348
2014	16	河 南	28849	51239	37944	61076	38425	36690	49426	31010	52779	69223	41847	38679	53509	35771	30482	46419	49301	42426	38824
2015	16	河 南	34941	48777	41338	65713	41283	39990	52099	33854	60671	74441	45429	41060	56866	37552	33857	50152	53308	47591	42587
2016	16	河 南	36785	46833	43783	66658	44753	43592	55485	36591	62467	91212	48503	40417	59171	41903	36848	55087	61045	51908	50552
2017	16	河 南	40990	56661	46854	69799	48836	46683	61455	38932	72373	103314	53501	46979	68353	46699	39522	62807	74914	58161	59783
2018	16	河 南	44314	66394	52474	79134	53163	53682	71392	41804	79543	116047	58396	51501	83301	47609	45677	71053	77481	67815	68197
2019	16	河 南	47272	71822	56691	88544	54972	56584	75865	43111	79992	124240	60973	49706	89322	49073	46858	73598	81520	73108	73221
2003	17	湖 北	5299	11556	10145	14247	9926	6923	11827	7134	16517	14539	10616	9943	14610	9131	8941	12098	12121	11697	12616
2004	17	湖 北	5566	12433	11108	15920	10649	7694	13931	8554	19451	17146	12232	10474	17153	10026	9958	13329	13460	13229	13909
2005	17	湖 北	6243	14900	13669	19523	13275	9367	16718	9582	24150	19817	16296	13145	19890	11718	15239	15477	16026	15943	16950
2006	17	湖 北	6993	16163	14526	21272	13757	11978	19422	10032	29379	22161	16744	14032	24385	12254	15088	16754	17493	17597	19140
2007	17	湖 北	8559	20439	17726	26499	16712	14677	20645	11947	26357	28767	27189	16892	28952	13389	16049	21027	20357	21393	24512
2008	17	湖 北	10610	24727	22065	28872	18894	17158	22991	13484	29999	35661	21165	19248	32107	15706	18295	22437	22787	23082	26800
2009	17	湖 北	15777	28158	25183	32294	22485	20839	26874	16994	32431	43200	24520	23149	39246	18029	22387	28636	27507	27091	30392
2010	17	湖 北	19541	31989	30689	39067	27661	25081	34668	20601	39222	49830	30760	26647	45518	21730	26086	34230	33751	32390	34198
2011	17	湖 北	22045	35715	35824	46928	33600	29285	40364	23169	39229	58104	35569	30806	48816	24867	29296	35859	38436	35310	36364
2012	17	湖 北	23039	41417	39394	49626	37668	31447	49591	25661	44182	62301	41227	33454	51212	28085	30299	39270	42295	37397	39503
2013	17	湖 北	24336	41853	42959	56047	44194	38099	49918	29452	56715	68047	42767	40533	61121	30664	31492	41068	48539	45201	39465
2014	17	湖 北	26962	48910	46966	72279	48331	41228	54620	33206	64563	76995	47049	43307	68102	34503	37433	50621	55133	51861	50738
2015	17	湖 北	29313	49231	49971	78034	51921	44691	60104	36190	72380	87293	51961	46244	74574	39690	39309	56114	62475	58510	55287
2016	17	湖 北	31548	52788	54033	84106	54636	47355	64690	38323	86398	93701	55550	49220	81015	45147	43921	65298	69692	61018	66400
2017	17	湖 北	35266	57643	58212	91195	56971	50961	72067	39720	88774	101551	58788	52106	93369	51270	45103	75350	79354	69129	77672
2018	17	湖 北	36099	73890	66094	98641	61658	58083	80963	42524	105918	98845	65731	58450	103272	57424	53445	85045	88178	79295	86118
2019	17	湖 北	36612	82779	70883	103188	66459	64448	86428	48571	104540	102798	68818	59369	114627	62704	57156	91587	93189	83183	93390
2003	18	湖 南	5291	9189	11312	15022	9328	10337	12565	9638	21361	18159	12959	13380	14853	9890	11274	13309	15122	15082	12818
2004	18	湖 南	6889	10838	12954	16442	10770	12047	14659	10162	26602	20507	13986	13632	16749	10907	14140	14529	17281	16299	14443
2005	18	湖 南	6895	13698	14474	18302	12078	14627	17452	12477	29834	22881	15376	14344	17990	13052	14307	16625	19125	18438	16092
2006	18	湖 南	7923	15341	16762	20269	13192	16935	19379	14224	30502	22846	17415	15778	21407	13497	15374	18529	21846	21355	17810
2007	18	湖 南	10617	17346	19511	24528	16247	18771	21466	14594	31153	27529	21938	19487	26739	17006	18961	24191	26557	24767	22506
2008	18	湖 南	13322	21007	22188	29899	18566	22457	24484	15460	31775	31879	24337	20280	31400	19655	20629	27683	30647	26441	26071
2009	18	湖 南	14519	22732	24716	31894	21079	24900	28722	17243	34616	38337	25034	22943	32558	20390	22865	28986	33461	30758	27790
2010	18	湖 南	15435	24867	28691	36134	23674	27604	32921	19963	39592	44428	27550	25086	36381	22133	23740	31825	36476	32908	30156
2011	18	湖 南	16878	31827	35652	39249	27890	33143	39267	23623	41330	56704	33394	27804	41841	22051	31027	35044	42073	38532	32611
2012	18	湖 南	20624	36492	39788	43086	32676	35622	45477	25783	47314	65336	37834	33093	45204	24673	35554	38596	50067	43448	35015
2013	18	湖 南	21744	37388	43356	51793	36989	38649	49583	29931	54344	77457	42022	35201	47101	27238	34523	41389	54704	48902	37143
2014	18	湖 南	23507	40044	47709	55815	40177	44427	53816	32304	58884	84674	45314	37915	49931	30265	39471	46424	60180	53924	41186
2015	18	湖 南	29354	42553	51265	60432	43049	45981	60105	34414	68020	92826	48892	44013	55910	35172	42499	53411	69475	62665	48004
2016	18	湖 南	33221	45059	54423	65241	45492	50545	65487	36919	76123	97704	53344	46985	62232	41319	45946	64965	77796	69158	56054
2017	18	湖 南	37936	47119	58552	69371	47439	54770	71387	39158	81785	99320	55748	49580	71425	47341	47600	73527	87879	76383	64263
2018	18	湖 南	43266	53786	64970	75143	52645	59850	80240	41009	96561	93694	63493	53070	84226	53583	60798	79209	95776	89668	72755
2019	18	湖 南	51094	57568	70427	94307	56072	61756	85170	39842	95989	91162	69065	61921	87971	53697	66351	77474	98446	98085	76565
2003	19	广 东	8990	12961	15763	28574	14608	18296	25936	14778	42966	33426	22312	21306	32963	16257	17832	20449	25157	25901	25642
2004	19	广 东	9894	17617	17007	31503	15639	21279	29258	16265	45624	38317	23977	24644	37952	17850	19665	22660	28248	30105	29220
2005	19	广 东	10120	23841	18019	34042	17375	23954	32589	17423	48972	44171	25113	24463	40625	19296	19755	24571	30689	32926	33027
2006	19	广 东	11113	26705	20349	37480	19491	26655	34656	18693	52641	53079	26380	27023	46668	20299	22512	26359	33188	35485	34975
2007	19	广 东	11857	31631	22547	44382	20867	28013	37774	19369	57805	66906	28959	30373	52330	23316	24172	31396	37788	38155	39796
2008	19	广 东	12905	36224	25249	48868	22917	32093	42613	20944	61210	78781	32450	34755	58143	26081	26982	34306	42314	40962	44661
2009	19	广 东	14469	41176	27578	54496	25509	34418	45631	22542	61118	84721	34240	38192	61896	28360	27343	38205	46609	44252	49837
2010	19	广 东	15270	47254	31277	58158	29019	38378	49623	24781	68204	90519	37590	41195	69434	31351	29956	42928	52308	47213	53350
2011	19	广 东	16790	53944	35772	64475	32872	44000	54890	28376	72847	97916	45109	47537	78743	35804	33954	48342	57684	53259	57500
2012	19	广 东	20315	56370	41712	72974	36540	48345	58895	31378	80595	101308	49644	51342	85565	41107	36844	53743	65942	56081	62700
2013	19	广 东	24884	71465	45829	89166	42074	51767	65980	35460	100186	117219	53601	60605	90557	43548	42187	58947	69057	65268	65245
2014	19	广 东	28823	78585	52308	94750	46946	56534	72211	38789	108465	127285	60404	62547	96537	44666	44896	63789	74377	69745	69684
2015	19	广 东	31380	86026	57419	102758	51001	61351	79680	43745	126083	138069	66768	66376	98929	48589	47483	72368	80838	80069	79848
2016	19	广 东	36431	91276	62383	110242	55263	67451	84444	46149	135859	135412	74014	69755	111233	53716	49297	83234	94663	93300	89550
2017	19	广 东	40926	104687	66823	119094	57839	71209	91022	46454	147039	149936	79479	77407	125634	58945	53418	95136	107710	104446	103752
2018	19	广 东	44141	123138	74030	133553	64747	78928	97888	48828	158044	166402	86137	84159	141024	67262	55885	109022	118701	116940	116738
2019	19	广 东	57306	142341	79087	142631	72193	85209	107503	50378	175333	163491	91931	86456	144174	73361	58257	117500	148119	130164	135313
2003	20	广 西	6643	10865	11156	17571	10604	8558	13999	8001	23783	17341	12596	10396	14944	10166	12021	11344	13800	12926	13912
2004	20	广 西	7551	13143	12829	20192	11683	9865	15724	8782	27152	20363	13887	11316	18588	10959	12090	12759	15535	15575	15488
2005	20	广 西	8703	15936	14626	22510	14032	11383	17961	9931	28600	23545	14566	13364	19123	11989	12026	14513	17785	17006	17385
2006	20	广 西	9917	17361	16805	24938	15809	13133	20201	10737	27096	28118	16508	14170	22046	12846	14930	16495	20318	20115	19833
2007	20	广 西	11959	20909	19408	29295	17963	15772	23818	12217	32673	36727	19136	16287	26192	14436	15124	20780	24254	23668	25315
2008	20	广 西	13617	22385	21181	33704	21207	18503	28112	13816	36558	45979	23481	19600	30827	16189	18582	24374	27399	28627	31166
2009	20	广 西	15397	24110	23508	35386	23506	22562	30917	15692	39250	51315	25223	21259	33162	18456	22235	27220	29678	31565	32717
2010	20	广 西	17023	28708	26179	39264	27688	26093	33697	17211	42633	60153	27597	25994	36182	20150	21791	32182	33100	32141	33864
2011	20	广 西	18387	33527	30206	42794	29311	29757	38229	20310	43143	64836	29253	25081	38626	21488	24978	32909	37358	31609	34830
2012	20	广 西	19511	34933	33317	46784	36449	32923	43413	24712	45815	69852	31776	27949	40093	24268	28566	34339	42778	36314	35777
2013	20	广 西	23430	37414	38245	55724	39126	37762	49651	25500	58162	82062	35230	33584	48101	28505	34921	38350	47276	40389	40748
2014	20	广 西	26186	44610	42245	62789	43772	42787	54638	28759	65285	86500	40344	36951	52236	31189	37218	41021	53785	46735	42220
2015	20	广 西	30875	46260	46121	70548	45246	46031	61137	30597	76688	92062	45020	43732	63754	36666	43299	54505	64821	56579	55953
2016	20	广 西	33131	50397	49835	73851	47079	49369	65433	31884	84064	89936	52588	48058	68957	40320	45729	60395	71529	62365	65218
2017	20	广 西	36875	56445	54653	78609	50900	54245	74059	34155	93936	96818	55688	51375	79025	44261	48314	67993	79005	70016	70371
2018	20	广 西	41958	61113	60370	90699	55047	60089	81633	38922	91934	103446	71155	57627	87768	47402	55287	74077	88795	77963	76099
2019	20	广 西	48490	63921	65825	101726	61181	65962	89805	40913	107824	103138	78247	63424	95268	50297	55714	77881	100523	78402	78328
2003	21	海 南	4784	8264	9929	15928	9190	8810	15571	8352	27898	19979	12017	10607	11709	9465	12538	13353	15329	14726	14785
2004	21	海 南	6212	11150	12068	17624	10845	9943	17503	10184	37486	25724	13942	12691	13758	10693	13259	16036	17712	16219	17099
2005	21	海 南	6344	15337	12833	18829	12082	11199	21504	10869	44996	28094	15625	15144	15174	11918	16075	18665	19642	18082	19854
2006	21	海 南	7157	16699	15438	23741	12511	12405	24626	12241	42635	33667	16476	16560	16647	11881	15918	20560	20305	20302	20905
2007	21	海 南	9122	18580	17125	27921	15384	15516	29527	14279	44599	40475	18762	17703	20028	13660	14657	24388	24116	22776	28125
2008	21	海 南	10823	24119	18914	32599	17677	18609	34239	15633	52976	43707	20430	20762	23619	15181	18233	26570	27172	24469	30015
2009	21	海 南	10855	30234	21840	35313	24129	21818	37642	16160	56358	52674	22834	18471	26211	17131	21192	31451	29251	25196	31489
2010	21	海 南	18042	30151	26772	40553	25237	23955	42036	18875	60215	62984	26157	20703	30680	20652	20526	40791	35308	29492	39376
2011	21	海 南	21906	39104	30601	42392	31560	29966	50691	22449	65525	67337	33787	24530	37584	24340	23229	46225	43210	34700	43316
2012	21	海 南	20436	39582	34682	48513	36529	35386	51948	27559	67537	69316	38460	28064	41682	26254	25199	50258	50136	35410	47110
2013	21	海 南	20032	45707	41841	52156	41126	32411	58729	33564	78812	75429	47873	46747	46333	31753	28983	54503	53771	43622	50047
2014	21	海 南	27085	51548	46193	58756	40441	44798	63079	36371	79160	88362	50881	49476	51248	36609	27880	60421	59793	47717	54158
2015	21	海 南	28438	59916	51501	69263	44149	48249	70737	40914	115013	93187	53552	49311	59332	40876	29606	72559	70489	56348	62894
2016	21	海 南	28016	60886	55265	74214	45557	51227	74464	42978	105687	102747	57788	53663	68888	45453	39352	75219	74765	63699	66612
2017	21	海 南	34665	58005	59599	81116	44056	58403	81288	46769	124017	117551	62248	60784	78517	46733	36522	79753	79350	67235	69342
2018	21	海 南	43624	68748	66980	88595	46019	64565	84586	56134	117730	120250	69427	68976	90573	50606	44647	88920	85815	75795	80102
2019	21	海 南	46118	65584	73015	100756	49564	71902	97580	55411	113936	131952	74132	68451	92199	51710	40725	98265	98159	79343	83064
2003	22	重 庆	8875	9725	11883	16372	10028	10497	12506	9412	25298	22300	12174	10805	14478	9359	12920	12865	13472	15537	14003
2004	22	重 庆	9878	12432	13751	19580	11194	12560	14806	10705	30607	25882	13518	12296	16928	10454	12187	14506	15937	19800	16100
2005	22	重 庆	10669	15458	15533	21190	12860	13769	16399	11382	30895	32578	14854	15645	22583	14659	13530	16753	19193	21265	19940
2006	22	重 庆	12253	17709	18367	25079	15018	16263	18496	12830	34147	33511	18232	17519	27813	12293	15100	19003	21813	23075	22537
2007	22	重 庆	14816	21686	21290	30676	17898	19325	21481	14077	36929	38918	23275	19417	33253	15083	19637	23388	26502	27244	27960
2008	22	重 庆	16459	25985	24131	39953	20658	22129	25090	15309	42810	44635	23666	21085	41326	17280	19217	27487	32535	27752	32591
2009	22	重 庆	18713	28012	27770	44577	23741	25745	28250	17129	49529	49871	28699	22253	47818	19162	22446	33873	37688	30383	35019
2010	22	重 庆	20544	31491	31894	50326	27730	29667	33613	21389	62634	58751	32396	25440	55381	21818	26049	37497	44249	34163	36936
2011	22	重 庆	31330	37703	36466	58756	32064	34675	39819	24388	63176	72277	40273	28146	65560	26411	28253	44029	51559	43786	44028
2012	22	重 庆	34254	41848	40448	63028	35581	39568	48702	27936	70598	87720	46012	33512	71712	30555	31991	48581	60072	46882	46751
2013	22	重 庆	35415	45092	47621	67647	43375	44484	55089	31090	73598	100437	50317	37097	78204	34480	35535	51560	62470	53723	48733
2014	22	重 庆	38064	48429	53207	70321	46037	48735	56039	35076	84189	115065	56872	39615	83498	39051	40900	61875	73471	59598	56512
2015	22	重 庆	41146	52541	57993	74068	48586	52454	60296	35994	92958	120355	59813	44070	87023	42617	42910	71512	81600	61544	64506
2016	22	重 庆	47529	55396	62584	79388	51537	56048	63717	37457	100517	126739	63852	48141	92787	48241	46015	76236	87162	65146	75554
2017	22	重 庆	54385	60198	65745	83021	54221	59596	70036	38974	112043	123836	66969	48456	102239	51684	47979	89251	96197	69873	85604
2018	22	重 庆	49774	85100	69467	86608	59605	66828	78996	41547	123128	133454	74343	50412	115365	62435	49131	101579	108037	79351	97843
2019	22	重 庆	56904	74446	75994	92949	62887	74946	89459	48759	131356	127222	82135	59727	128155	69792	55001	105418	114811	82344	102768
2003	23	四 川	8902	10613	11172	15303	9255	10055	13171	9192	23069	20550	12688	12559	19913	9859	13180	12825	14861	13779	14532
2004	23	四 川	9264	12986	12744	17232	10250	11901	15149	10349	28146	24090	13583	15150	21545	11044	13960	13989	16891	17117	16048
2005	23	四 川	10016	16826	14275	19460	11234	14138	17672	11072	32828	27519	14613	19399	25303	11961	18309	15149	18868	18865	18006
2006	23	四 川	11224	18682	16404	21469	12839	15682	20776	12555	32229	28282	16765	19556	29754	13014	17605	16374	21205	20204	19405
2007	23	四 川	13377	21752	18906	25518	14902	17321	23420	14493	34622	33843	19928	25107	36394	15629	22115	20937	25887	23597	24960
2008	23	四 川	15231	28632	22046	30484	17746	20949	27344	16531	37462	42055	21818	26158	42806	16901	18493	23491	30020	25859	29540
2009	23	四 川	17748	31954	24448	33176	20639	24786	31675	19062	38839	43556	25408	30377	47858	19106	21319	29495	33082	28291	32314
2010	23	四 川	19980	37984	28577	39844	24036	29046	36496	22262	42615	52854	29995	34221	53854	20555	24029	34408	39209	32101	35015
2011	23	四 川	26476	42399	33210	45953	27500	33453	43533	26691	46954	61242	35298	38967	63235	24661	29688	39139	45922	36944	39555
2012	23	四 川	31430	46812	36243	50484	31939	38334	53841	28397	56506	69846	41813	47518	67113	28701	32815	44443	53451	43665	44117
2013	23	四 川	34437	51485	44259	66679	37421	41814	58276	30613	69552	76687	45758	48724	76610	33646	36253	49234	59159	47138	48635
2014	23	四 川	39358	59959	48770	74929	41132	46215	60631	33378	77268	84601	49713	49288	80634	36887	39203	52357	63188	51728	52062
2015	23	四 川	47729	61715	52110	79732	45255	50188	65981	36807	82883	86084	53610	52818	86498	40665	44212	63311	73704	58860	63704
2016	23	四 川	52813	64895	56439	86951	48088	51824	69490	38381	88800	87119	59135	55754	91309	44041	47806	69737	82150	64885	71074
2017	23	四 川	59159	76135	60149	90113	49461	56788	76738	40539	95805	91529	59954	60467	101514	48945	47591	75988	89706	71769	79636
2018	23	四 川	65412	94172	69810	99110	55134	66831	85101	43904	110548	96629	65676	59053	124631	55119	49167	83030	98306	80152	90039
2019	23	四 川	64875	103207	73407	108932	59331	72470	98084	47076	125696	94818	72432	57667	133828	62968	52735	90160	109055	86139	95421
2003	24	贵 州	8263	11556	10291	18801	8942	8630	13280	8581	18426	16121	10396	11884	14090	8724	8455	10597	12120	11437	11472
2004	24	贵 州	9245	14231	11552	22243	10307	9256	16181	9854	17399	21081	9503	11879	14999	9688	9729	11720	13210	11412	12521
2005	24	贵 州	10450	17175	13471	26326	11152	10209	17812	9982	23228	25051	9770	13676	18086	12040	9055	13957	14575	12975	14202
2006	24	贵 州	12361	18067	15734	29359	12008	13131	19975	9672	22464	28612	11980	15626	20308	12781	10484	16316	18346	17954	17469
2007	24	贵 州	15274	20367	17918	35814	14531	15595	21657	11122	29653	38124	13924	17605	23656	14774	15228	21693	22867	21206	22711
2008	24	贵 州	16890	24487	22224	42457	16899	22698	26288	12784	34275	48292	15552	19970	25942	16074	13591	23546	25575	24699	25787
2009	24	贵 州	17249	27280	25284	40570	22744	24081	28652	17054	36015	53780	21959	20718	28087	16895	21268	28310	27370	24332	28421
2010	24	贵 州	18175	32779	29381	47822	25437	27776	32106	18935	37097	61474	22997	22036	29670	20737	21966	30466	29993	24531	29537
2011	24	贵 州	23923	40914	35200	53096	32384	34528	37864	23211	45841	75169	28038	26900	34906	25628	26772	34678	33803	29999	33992
2012	24	贵 州	30850	43113	36187	59344	36560	40325	47049	25372	53384	81630	33617	30121	39087	27779	28224	42432	44289	35937	40549
2013	24	贵 州	33490	45308	43368	64270	42874	44489	52524	29760	64260	102294	39683	35696	45749	27832	28437	47235	53103	43319	45226
2014	24	贵 州	38853	50309	47607	68675	45227	49886	58617	34416	75068	118477	44867	46156	57290	31706	34214	52713	59142	48944	50699
2015	24	贵 州	47704	49503	52027	72900	47832	57576	65506	37208	80955	123592	48331	48290	64338	36336	35528	64268	67511	57257	61370
2016	24	贵 州	53874	49909	58288	81297	53487	60617	70936	40505	79355	132964	53467	50522	72107	40230	38246	72580	73553	67427	70060
2017	24	贵 州	58198	56586	61456	93136	56266	63243	75439	40267	91063	141959	54318	52910	79826	46697	38568	79815	82248	75629	77318
2018	24	贵 州	52067	63943	74072	102967	62684	71507	86100	43862	108388	143411	62988	56455	87726	45840	43654	84484	86763	87154	79464
2019	24	贵 州	50757	71133	80284	110790	72739	79656	91525	45082	104948	132008	64267	63973	95520	50574	46821	87861	91883	86338	79535
2003	25	云 南	9212	10861	12645	18490	10475	11068	13810	8793	19343	15133	12694	14861	14827	10848	10954	13391	15094	13284	13191
2004	25	云 南	9575	13318	14898	20858	11491	13287	16575	9361	21855	20103	13789	18985	16884	11580	11008	14613	16219	13844	14381
2005	25	云 南	10513	15763	17166	26741	13316	15761	19096	10309	26434	23900	13301	19226	18901	11873	11521	15239	16731	14570	15040
2006	25	云 南	12219	18387	18837	29105	13662	17514	22443	11030	26580	27792	14142	18642	20422	12778	12380	18344	19464	16427	17800
2007	25	云 南	13088	18755	20028	32832	14098	17869	25691	11371	29288	35352	15805	16651	23564	13873	12927	20674	21103	18866	21143
2008	25	云 南	13537	23629	22681	37459	16081	22185	30067	13380	32603	42672	17896	21306	26264	15375	16459	22484	23236	20164	27478
2009	25	云 南	15011	23725	23614	40101	17629	23488	31714	14853	36687	52773	20612	22049	30110	16339	17035	29197	24484	22377	30310
2010	25	云 南	15922	27175	28550	44110	21002	26268	35897	16030	37346	60775	22236	23969	34588	17788	18340	32301	28988	24834	31650
2011	25	云 南	19612	33926	32923	48055	25233	31423	44111	19476	42088	76946	28992	27481	42284	23632	22660	36318	35618	32058	34402
2012	25	云 南	21232	38526	36574	53087	28354	34154	50069	23297	48332	88699	33562	33950	43722	26788	26146	39983	41801	35997	37580
2013	25	云 南	24290	41997	40659	64083	32598	38441	53775	26571	56193	104144	38864	35425	48879	30608	30000	45448	46400	41914	42351
2014	25	云 南	25457	42322	43160	69160	36229	42507	59701	28741	62746	110235	43732	37356	53229	32949	32696	49291	50784	46209	45221
2015	25	云 南	29794	43101	45903	73588	38557	46063	66450	31429	72496	118166	46064	41225	64270	38911	37319	62263	59543	56135	56413
2016	25	云 南	36939	45182	49643	78234	41945	49611	72296	33832	75240	121529	49441	43305	73883	46529	38581	76918	71550	63017	74017
2017	25	云 南	45363	50066	54032	86354	43966	56150	80853	36430	80497	130774	50873	45247	84202	53368	39920	93600	82232	76032	90916
2018	25	云 南	47647	59328	61857	94601	49128	59625	89006	39206	85135	137046	55289	47061	94132	55583	46139	101239	87406	83405	98123
2019	25	云 南	38748	70534	75585	102867	59815	74293	100869	43571	92629	137161	65138	55920	104725	56631	43858	98360	94059	85090	97777
2003	27	陕 西	8177	12534	10281	16218	9926	7290	14506	7654	26772	17032	10931	9853	14977	9528	9076	12598	11129	11067	11030
2004	27	陕 西	8713	16195	11894	18265	11071	8506	16647	8618	30085	19832	13048	11055	16596	10327	9922	13634	12259	12815	12070
2005	27	陕 西	10218	19912	13422	20906	11418	9452	18595	9366	33726	23128	13956	12080	20053	11099	11263	15310	14495	13429	13351
2006	27	陕 西	11016	24325	15825	22539	12570	11137	17958	9974	36618	24411	17229	14665	23486	11581	12820	16897	16187	14846	14343
2007	27	陕 西	13551	28990	17968	27417	14859	12731	23725	13390	42204	31335	26622	16982	30413	14475	21457	23089	21119	17001	19914
2008	27	陕 西	16985	33305	20910	32949	16844	15183	28960	16123	50657	39246	31592	20330	36815	19559	25160	29860	26016	21079	24980
2009	27	陕 西	20670	36289	23428	35388	22822	20034	31265	16338	38628	46122	32639	27595	39550	21832	23506	35063	30961	27119	30506
2010	27	陕 西	23934	42417	26015	39677	25357	23836	35846	18171	42498	48138	37842	28327	48734	23514	26147	39785	34809	29724	33224
2011	27	陕 西	28159	52368	33385	47667	28993	27794	41233	21626	43008	53289	31770	30804	56784	26283	24562	42176	40075	33425	37033
2012	27	陕 西	32557	57556	37833	54069	34033	33043	45982	25006	56137	57997	35213	35737	60394	30802	26762	47596	46380	38995	42698
2013	27	陕 西	36800	69904	42072	56935	39375	34561	50410	27587	69266	71987	41317	47752	65546	35276	32047	50826	50090	46364	44868
2014	27	陕 西	38418	69920	46636	62907	43454	37709	57904	28929	91423	74340	43865	43471	63478	36846	32890	51856	49447	47853	44915
2015	27	陕 西	43678	68245	51557	67945	46184	40983	63194	31506	104928	76896	47517	49740	67134	40081	36733	57225	55203	52918	50868
2016	27	陕 西	48185	73995	54348	71640	50797	43208	65955	34293	121311	82626	51205	50797	72786	41151	38405	62813	61509	55946	55589
2017	27	陕 西	50301	78103	59941	77998	54833	48791	72962	36703	130891	86024	51772	48969	79714	43375	38342	69575	66995	57597	62485
2018	27	陕 西	53301	91512	66489	96748	58710	54357	81571	38556	135541	86335	58330	51747	94877	45479	48480	75909	74814	60860	67603
2019	27	陕 西	62010	100597	72846	105701	64735	59383	89883	41146	152088	92560	64840	58692	98029	50203	52337	78636	80942	65406	73127
2003	28	甘 肃	8874	12205	11635	17544	9303	7397	14843	7461	13104	13991	11178	10345	14470	11678	10629	13534	13859	12789	13677
2004	28	甘 肃	9406	14727	13383	19786	9899	8222	16614	8412	13672	16292	9078	11692	15930	12289	10360	14481	14517	13640	14870
2005	28	甘 肃	9857	17656	14930	21398	9735	8731	17467	8398	16103	17950	11282	11149	18496	13235	10766	15983	15496	15147	16196
2006	28	甘 肃	10867	20573	16929	22326	10526	10729	22655	11120	15999	19343	12182	12366	20167	13444	20252	18545	17322	16767	17587
2007	28	甘 肃	13117	26626	21182	27022	13102	12816	25268	12079	18818	24671	13562	14234	23397	16584	17934	22379	19983	20248	21406
2008	28	甘 肃	14400	34354	24895	30370	13445	15312	27913	13961	19940	27511	14910	16682	26746	19491	21719	24897	23022	22676	25053
2009	28	甘 肃	16872	42760	25936	32685	16423	16813	30916	15163	22186	30627	17985	19705	30173	21603	19559	28608	26931	26946	27945
2010	28	甘 肃	19735	43258	28173	37624	20836	20563	30928	17588	24896	35311	22936	21608	34730	23186	21384	29725	28881	28769	30227
2011	28	甘 肃	20409	54103	36312	35797	25334	23676	37272	19653	25181	38163	26660	23143	34475	24072	22916	31635	28579	28503	29806
2012	28	甘 肃	24971	59549	41815	41118	33312	27122	43603	22865	33062	44437	31397	28884	41814	28195	24604	37631	35730	35478	34481
2013	28	甘 肃	29317	57788	46152	57778	34793	33083	51229	26817	39962	48791	37381	27057	49957	33119	27199	46495	43061	39989	41848
2014	28	甘 肃	31950	64881	49442	58916	37176	35765	56236	29387	45628	52334	40045	39915	58166	37544	32779	51241	45518	46981	45870
2015	28	甘 肃	37179	63590	50458	63245	40551	39109	61318	32698	54916	59923	44302	44895	67352	45312	41777	61396	56180	55246	55574
2016	28	甘 肃	40179	64807	53130	64084	43683	41464	64177	34914	60292	60252	46724	47145	75114	50595	38823	69690	61593	58837	63535
2017	28	甘 肃	47073	76002	59132	67961	47590	44523	70222	37114	67912	63050	48071	46416	85197	52385	44184	76850	68487	63705	69136
2018	28	甘 肃	47010	84148	68310	77781	51863	51200	81723	38162	75412	72637	50407	59299	94087	54623	57058	83981	74842	69608	74866
2019	28	甘 肃	51011	85432	73138	83511	54097	55159	84638	40319	80909	78914	49226	50130	99718	55910	44366	86761	76480	68623	76736
2003	29	青 海	10577	14930	12193	21364	10694	9986	18227	11811	24594	19235	14024	12874	21917	10930	13188	16473	17172	15071	16971
2004	29	青 海	12012	18173	12991	24040	12275	10021	18016	12214	27423	22366	12978	12394	26637	13756	14705	18657	19013	17533	18742
2005	29	青 海	11558	18476	14638	25145	15803	13142	21144	14906	29595	23940	11660	12167	31185	14599	31780	19898	20660	20124	20477
2006	29	青 海	15332	24021	17184	27047	16291	13850	24278	13133	29897	25721	12712	17468	35029	15386	48111	24173	23810	23073	23544
2007	29	青 海	18747	27600	19923	28286	15811	15257	29132	12744	26777	29131	14924	22210	40976	18481	26884	30464	27329	28782	28795
2008	29	青 海	21849	33732	23742	35955	18529	19153	33827	14389	31454	36723	24131	18651	44408	21134	45740	36426	32695	31526	34068
2009	29	青 海	24022	34890	23671	39404	24062	21175	37319	16825	35417	37456	22716	35718	45158	23562	30093	38821	35089	36700	37760
2010	29	青 海	26020	40320	28459	44721	26423	24898	43523	18574	41668	41641	21948	42784	48822	25591	32969	42447	37126	38694	40648
2011	29	青 海	30407	45311	35208	45168	32352	30059	50252	21874	47356	54446	26309	46007	55466	31582	35573	49848	41696	42506	46408
2012	29	青 海	29087	54731	42633	59026	38019	35273	57690	27613	54819	59574	33489	59427	60957	33091	38722	51359	43126	45084	47443
2013	29	青 海	32204	72764	45090	63403	40242	40200	60428	31724	49989	67182	32456	30685	59097	39286	27848	57705	48976	49730	54414
2014	29	青 海	35634	80349	51124	66310	45305	41917	66580	35311	60662	77354	36842	36173	61650	44601	33526	63981	55752	55759	59498
2015	29	青 海	40978	79332	51386	69805	48717	46356	74669	40313	72527	81359	38887	40891	69678	48241	36055	70728	58622	59077	64438
2016	29	青 海	43796	85469	54846	72928	50431	49271	78862	41809	71273	88957	40880	46666	78808	55415	37917	79151	65582	67319	72434
2017	29	青 海	51711	100823	59386	84618	57674	52477	86082	42829	79183	98911	44863	49908	87248	63194	41990	91790	75747	78577	85500
2018	29	青 海	56145	117264	63952	96507	69611	66955	95947	46842	87547	103178	49772	55791	98698	74948	46051	101131	78625	80991	93527
2019	29	青 海	53169	130239	72550	102656	69924	70163	99865	45724	107050	117992	53146	61323	100798	69544	47641	99905	92817	78602	97769
2003	30	宁 夏	8269	14573	10424	18793	10893	9268	15341	7918	26867	19532	10678	11282	13876	12007	10566	15115	14119	13910	13757
2004	30	宁 夏	8447	17299	11875	20699	12277	11365	16308	8734	27114	23443	12390	13030	16730	13589	12956	16564	14537	15426	15450
2005	30	宁 夏	9735	25827	13555	25876	11754	13172	18817	10404	33315	29232	14388	12010	18051	13633	13712	18256	18081	16287	17520
2006	30	宁 夏	11757	34339	15903	34783	13835	15909	23082	11150	33686	33365	15338	13398	22540	14959	15728	20935	18295	19337	19780
2007	30	宁 夏	13833	41556	19461	39804	17052	19275	25339	13048	33878	40358	18560	16460	26749	18081	16211	27626	22549	26142	26790
2008	30	宁 夏	16458	52281	22917	45153	19373	24147	29595	14295	33972	46484	23086	19914	31069	20550	20979	30542	27099	29963	30683
2009	30	宁 夏	19384	57106	24431	46403	23367	25553	32226	15529	38298	47745	26031	20417	34346	22362	24951	34112	28514	32279	32017
2010	30	宁 夏	20940	71685	29560	55543	25284	29497	36498	17799	42469	53674	28610	26137	36666	25155	23356	35785	31896	34118	33119
2011	30	宁 夏	24563	78338	35503	65983	29065	33774	40967	22922	52173	62587	33348	30143	46198	32260	25688	40455	35707	42154	37427
2012	30	宁 夏	28643	77581	39543	70533	38330	39124	50730	28149	59420	68814	42469	31927	49144	34281	37162	45954	43986	47805	44337
2013	30	宁 夏	32753	81809	43353	80137	39589	41684	54726	32363	65043	74026	42676	33492	57000	35624	35155	50283	44547	48919	47962
2014	30	宁 夏	35391	83893	50028	87483	40284	45770	58079	34360	69067	82011	43761	39230	63195	41362	36742	53696	50525	54120	50350
2015	30	宁 夏	38815	79347	51636	92107	44283	47364	63157	36158	77487	81019	46157	40239	71581	44768	39732	64819	60676	62941	61236
2016	30	宁 夏	41981	94718	52660	96132	46832	48648	68313	37149	80617	83872	49217	42957	76339	48789	41492	70801	71110	66563	67088
2017	30	宁 夏	44844	96498	56273	103768	47483	51265	73175	40170	90085	85861	53023	42301	78182	51446	46712	77505	83680	67913	71658
2018	30	宁 夏	55938	113661	62086	111299	52886	56104	78953	42633	102816	88083	62424	45122	91621	56530	54836	83660	94246	77093	76665
2019	30	宁 夏	42833	128875	72097	120341	58762	57625	87961	44066	104328	95062	63217	53948	93039	56335	51987	87161	102088	82955	75518
2003	31	新 疆	8984	19978	12181	17724	11619	13082	17767	10337	23338	20680	13327	12666	16201	12091	13860	15167	15327	14966	15680
2004	31	新 疆	9281	21576	13518	20402	12705	14103	20266	11405	24032	24416	14060	13502	17777	13094	14269	16403	16537	16510	16802
2005	31	新 疆	9875	23337	14871	21920	14005	15127	23634	12417	27544	25149	14517	14176	19077	13419	12159	17183	17297	16972	17661
2006	31	新 疆	11297	26701	16751	23247	15696	17122	25062	13454	28120	26146	15315	16099	21312	15022	14182	19612	19852	19154	20251
2007	31	新 疆	12976	32174	20382	28684	17865	20357	31248	15043	34764	34110	19493	16065	26571	17645	15705	23603	23265	23339	24973
2008	31	新 疆	14499	40857	24999	33229	21082	23332	36244	17136	34630	39158	19617	17931	29939	20295	16222	26536	26166	25554	28983
2009	31	新 疆	16862	42919	27400	38079	25118	26889	40249	18049	37875	45502	21389	19029	32633	22412	16022	29712	27471	28027	31217
2010	31	新 疆	20022	47805	31588	43855	28908	32343	45572	21954	43124	53127	23005	22517	38593	25575	18330	35016	32323	32609	35950
2011	31	新 疆	22678	63085	39883	50591	35558	40300	53243	28136	48034	59732	31948	27185	45501	28561	30968	40697	38552	38062	39862
2012	31	新 疆	26323	76486	47371	53796	41232	45733	62427	32468	54862	69445	36266	35016	50555	32060	27376	47187	44864	45049	45071
2013	31	新 疆	30199	79421	51673	62704	45940	49631	64997	37072	64214	74551	42100	39154	60859	36283	32441	50809	49696	50951	46636
2014	31	新 疆	33872	85241	57397	69737	51299	53353	71957	41040	70757	79653	45377	44272	65981	38981	35928	53792	53203	52299	48680
2015	31	新 疆	38070	86253	58752	70708	56238	56573	78215	43885	78238	88212	47160	44595	75478	46068	40614	69813	65463	64906	59598
2016	31	新 疆	38469	90442	60313	81908	58576	59570	83898	45899	84086	92422	49214	48110	79944	48099	42785	75080	70796	71168	63948
2017	31	新 疆	41571	105881	66523	88028	59844	66008	91702	46880	98251	95374	49079	51948	85516	49242	43116	76438	76240	80821	66710
2018	31	新 疆	29723	123329	71906	97252	62485	73238	100047	48680	105184	99892	52727	54628	89605	51437	50435	78255	85671	79840	68980
2019	31	新 疆	44477	141572	77518	103826	67447	76349	104646	50008	104606	107334	54761	54636	95077	52537	59241	82439	86131	84009	66383

## Sheet: Sheet4
	ID	地 区	Province	Employed persons in agriculture, forestry, animal husbandry and fishery sector (person)	Employed persons in mining sector (RMB)	Employed persons in manufacturing sector (person)	Employed persons in production and supply of wlectricity, heat, gas and water sector (person)	Employed persons in construction sector (person)	Employed persons in wholesale and retail trades sector (person)	Employed persons in transport, storage and post sector (person)	Employed persons in hotels and catering services sector (person)	Employed persons in information transmission, software and information technology sector (person)	Employed persons in financial intermediation sector (person)	Employed persons in real estate sector (person)	Employed persons in leasiong and business services sector (person)	Employed persons in scientific research and technical services sector (person)	Employed persons in management of water conservancy, environment and public sector (person)	Employed persons in services to households, repair and other services sector (person)	Employed persons in education sector (person)	Employed persons in health and social service sector (person)	Employed persons in culture, sports and entertainment sector (person)	Employed persons in public Management, social security and social organization sector (person)
2003	1	北 京	Beijing	29114	24602	1022112	37764	650722	376117	306787	212208	177571	140187	189309	376442	363205	60758	91688	328723	136283	119183	269554
2004	1	北 京	Beijing	29773	21608	1050836	62822	412505	422104	360906	253761	180548	154392	228464	426358	295608	68394	109361	370856	155342	134950	289707
2005	1	北 京	Beijing	28330	22183	1023655	57654	410807	387754	370551	245917	194035	158010	233468	466557	316359	70376	102725	367729	162330	140565	296942
2006	1	北 京	Beijing	26650	20969	996621	59329	342963	364807	415019	244109	213604	184587	243384	515752	335918	76875	99656	376680	172449	137295	311073
2007	1	北 京	Beijing	27113	20376	1024950	67024	328074	383644	458886	249356	291958	208440	263378	555476	354928	80678	91309	389526	177056	145071	326575
2008	1	北 京	Beijing	25983	45468	963114	66196	327597	436418	476774	259835	334102	226825	288297	628099	400982	81198	66349	399362	186822	149026	340166
2009	1	北 京	Beijing	32282	50284	994566	66111	341064	501649	500662	282761	362109	253837	301468	728774	437742	87669	76248	416743	201368	158219	399922
2010	1	北 京	Beijing	32285	45448	1005543	67987	393501	553851	510042	279558	417332	272388	315401	778074	457409	87581	74442	405595	206652	152505	410754
2011	1	北 京	Beijing	23632	67212	1077745	90182	425344	635709	574088	292292	490865	328689	351304	587037	505675	89635	73333	425964	224330	165116	430866
2012	1	北 京	Beijing	25446	68778	1079701	89378	427383	686440	578348	319643	526268	375626	370621	614032	540483	93887	86390	443758	229606	170606	447323
2013	1	北 京	Beijing	31346	67584	1034888	87189	439059	688143	592268	309947	582393	391442	405836	661746	596532	98211	90942	461041	248279	180964	454755
2014	1	北 京	Beijing	32331	61051	1000347	82010	456031	722818	602262	302501	611106	431574	410147	707537	597980	99202	88396	458032	254294	174448	466534
2015	1	北 京	Beijing	38949	52859	921913	82274	453319	770540	600266	297559	680070	471636	421574	800887	593471	101949	90237	473218	272740	182639	467348
2016	1	北 京	Beijing	36867	45330	868847	90941	459436	783688	582306	294119	692226	514163	438857	801256	689751	103131	85803	486258	285829	186619	469770
2017	1	北 京	Beijing	34116	41200	823796	90362	466160	767973	576935	311052	774400	544498	442784	882695	712481	106640	86000	505697	293252	190189	478359
2018	1	北 京	Beijing	26639	35957	744135	97386	478122	736426	601978	312119	840300	546870	472509	812969	717149	122423	113572	557763	304521	190281	481900
2019	1	北 京	Beijing	3585	31784	653864	95549	451159	596265	589525	304980	859131	644776	474197	15723	689448	123799	68324	575765	325307	186057	502400
2003	2	天 津	Tianjin	9747	69738	771367	35481	99424	118660	134642	35093	15382	52016	19043	40281	52881	33496	32492	169026	68312	21430	131652
2004	2	天 津	Tianjin	8666	76896	767918	30745	92620	116907	133305	33255	19114	50710	25911	50506	51863	39717	47747	165012	75520	20036	132677
2005	2	天 津	Tianjin	8149	73114	777223	33612	91209	117381	117669	29964	24253	51154	23225	65860	53119	36015	42997	169740	77119	17491	131923
2006	2	天 津	Tianjin	7317	74871	784782	34740	89315	110420	115790	34280	23009	51515	22255	65329	53522	35650	50829	167513	77592	18372	132869
2007	2	天 津	Tianjin	7416	77035	776771	34456	105451	127653	120138	35521	23863	55428	25049	68482	58259	35239	55174	166296	79122	18518	132370
2008	2	天 津	Tianjin	7128	70155	727081	35513	108474	135336	124723	37118	25317	61730	31113	73290	63842	35728	63031	167894	83401	17747	137514
2009	2	天 津	Tianjin	7394	92698	728962	33358	106732	118557	122863	40855	24751	66839	31173	73409	59080	35995	70052	165622	84953	17506	135702
2010	2	天 津	Tianjin	7138	89574	752956	32754	102114	123866	124988	48321	22414	69531	36104	69457	64681	35488	68646	164272	89762	17518	136948
2011	2	天 津	Tianjin	6033	104064	1126598	42114	305591	147451	114261	67342	20801	77246	41552	64120	53367	33560	68165	164584	88768	15971	140831
2012	2	天 津	Tianjin	5494	69158	1202451	43718	310989	174726	140762	69102	32678	78217	55270	54398	82728	36823	108802	163035	88333	19026	155004
2013	2	天 津	Tianjin	5346	76133	1223296	44907	310366	171697	143455	65674	35718	80907	91472	57713	107480	41373	108307	189399	93077	22681	155362
2014	2	天 津	Tianjin	5045	66381	1189999	44601	312716	172696	143421	59567	38477	89117	66674	66623	106886	40724	110436	173698	92795	20816	154440
2015	2	天 津	Tianjin	5303	64959	1107759	45238	295429	178455	150084	51796	43541	121349	73436	82003	113175	41349	109868	179695	97125	22085	165152
2016	2	天 津	Tianjin	8475	43989	994163	43475	281843	182105	146712	50668	48475	160073	79579	92762	114870	44223	93733	179583	100956	21217	173546
2017	2	天 津	Tianjin	6226	65986	782405	40786	281197	153182	145358	49280	53464	191651	81795	127149	119441	40589	64742	180238	111410	25330	174551
2018	2	天 津	Tianjin	5309	60011	689562	40350	266291	192004	132342	55546	64241	170514	103910	132164	108000	33259	46721	184332	108223	22640	184450
2019	2	天 津	Tianjin	2620	58440	673285	41725	250550	199640	149341	63306	65728	198017	107976	7185	110839	36809	65130	202407	116909	21479	176401
2003	3	河 北	Hebei	90863	281011	1267156	167531	331328	331828	270880	47659	38318	177850	24426	33907	72528	79714	27476	816267	218643	51210	663857
2004	3	河 北	Hebei	86376	278676	1215442	171407	336335	286150	256342	50449	46615	176780	29137	39980	75513	85393	22728	832502	224143	47881	679209
2005	3	河 北	Hebei	85056	275921	1203315	174403	339374	270288	255651	50559	46612	181202	29160	47333	75571	85813	20935	839606	228385	48679	697668
2006	3	河 北	Hebei	82405	276510	1213562	181156	358075	252680	257107	50138	52728	190608	28707	54441	74749	88870	20723	839490	233178	47400	709644
2007	3	河 北	Hebei	78925	266949	1222293	184323	338382	236891	250928	48853	55957	196160	29264	50068	74111	91068	21386	828680	237553	46873	726311
2008	3	河 北	Hebei	74899	280926	1163827	195040	345598	231690	256907	47748	55823	221543	32133	47630	81732	88532	21773	826673	245897	46746	745060
2009	3	河 北	Hebei	70711	270216	1169822	198460	339425	221463	254790	45261	60454	234191	32804	51344	84096	92543	19455	824768	257818	47165	755840
2010	3	河 北	Hebei	66360	277623	1196714	199376	365283	225492	251018	45294	62510	242448	41637	49195	88780	101110	20344	863053	278163	49843	771590
2011	3	河 北	Hebei	57072	284170	1.30577e+06	202074	506197	234736	243789	52683	58589	238344	48988	51101	99997	101307	20561	887923	300116	50859	809964
2012	3	河 北	Hebei	55239	287978	1453747	212466	814008	263272	243019	67824	65019	246544	68395	51580	125263	112545	21569	898513	322273	52299	837911
2013	3	河 北	Hebei	52407	282686	1503358	196189	906173	288563	275895	69333	86275	256396	91472	114896	139734	114872	14368	897280	336961	52785	853937
2014	3	河 北	Hebei	45579	272604	1477010	192078	890488	282444	289603	62678	85587	276627	105257	137689	144762	114396	15216	899082	354472	52686	863532
2015	3	河 北	Hebei	41712	246381	1408507	187123	843639	271404	291791	58072	88465	299102	109780	134382	148112	117606	17013	890717	364528	54861	863273
2016	3	河 北	Hebei	38868	227719	1.36324e+06	187943	818486	268764	286719	54220	84213	321685	121285	126147	163514	118743	25277	881037	377419	55019	875912
2017	3	河 北	Hebei	34586	198094	1.02554e+06	178587	382765	177737	242689	33612	75299	346430	63482	97656	141062	122466	22496	881687	392093	49960	886916
2018	3	河 北	Hebei	25427	180508	983734	178383	481235	189728	245802	41049	83758	361434	83213	107371	159294	122128	19646	879400	396097	51349	913821
2019	3	河 北	Hebei	26534	164847	950671	187187	432055	205701	274703	44919	101197	370462	104200	3843	163756	90527	25084	959900	453302	51821	992356
2003	4	山 西	Shanxi	41080	569349	760979	114585	208716	252993	218380	36941	26649	117168	13616	39281	54639	48814	30822	449556	135896	41415	408392
2004	4	山 西	Shanxi	39826	637339	740516	116139	200401	235636	215985	35581	35237	115117	13594	40405	56268	50272	31085	456851	137684	43604	418190
2005	4	山 西	Shanxi	36152	662856	721656	100909	207800	210110	199722	40015	40962	120673	13416	47589	58583	50314	12597	464055	138887	42689	435960
2006	4	山 西	Shanxi	35418	682438	730041	102813	201127	191708	215791	35237	38891	121073	13554	58668	60160	53243	11995	469750	142422	43221	447888
2007	4	山 西	Shanxi	35228	700119	757936	105856	203139	185864	227119	39811	43842	128110	15087	59009	59048	57402	7976	480661	146252	45194	454897
2008	4	山 西	Shanxi	34965	716699	703284	105810	198258	178634	220513	41054	45620	138977	14688	62976	58957	56189	7626	491297	149657	47890	478687
2009	4	山 西	Shanxi	25834	750272	697921	99074	225487	178844	212726	42127	42873	139896	26841	62331	58885	59540	7487	479530	152934	46073	549300
2010	4	山 西	Shanxi	32007	796138	717355	99414	225162	175876	203545	42315	41225	137879	25818	63738	59872	63814	7259	486279	160890	46327	559128
2011	4	山 西	Shanxi	32430	857000	701940	103351	251356	180713	218726	48883	49342	150372	20608	54834	60793	69644	7116	492001	167285	46070	584405
2012	4	山 西	Shanxi	28246	902565	702927	111272	387767	191635	223140	69215	52745	157731	26119	53465	59181	76288	6443	499074	171291	44620	596277
2013	4	山 西	Shanxi	21983	1030136	731369	114783	384486	212002	236392	55567	60181	156064	32293	72872	69576	88274	14823	523509	188399	46697	600979
2014	4	山 西	Shanxi	20227	985224	691336	118489	355429	190499	245916	50174	54986	156207	35868	79542	73264	93770	13606	527124	195108	48777	585400
2015	4	山 西	Shanxi	18181	953335	654168	116835	333401	174652	241216	42145	55397	168227	36116	88852	75243	95522	6490	517084	200364	45836	579601
2016	4	山 西	Shanxi	17389	910853	637631	125355	294152	170781	234470	39338	49690	178822	34821	90796	72279	97995	6249	512600	204858	45774	581672
2017	4	山 西	Shanxi	16464	893162	639914	129051	291688	148286	234515	36855	48649	185789	37591	81939	70876	101310	9693	512714	211133	44382	592791
2018	4	山 西	Shanxi	13567	883731	603351	130217	297125	157164	214169	34849	48734	208065	36494	86282	73276	90300	8653	500438	217123	46620	608089
2019	4	山 西	Shanxi	9769	815141	563525	158309	289929	136106	210564	35494	52343	299985	54959	2454	77318	79533	8444	552415	246515	44305	657877
2003	5	内蒙古	Inner Monglia	323278	168516	449714	88954	130495	84064	164931	26095	25116	75733	14585	37189	39281	53620	9284	321522	103173	31477	296498
2004	5	内蒙古	Inner Monglia	306232	170084	437067	90951	125274	80546	165755	26568	27100	76507	16354	28424	40733	57594	9264	327260	104340	31176	309471
2005	5	内蒙古	Inner Monglia	300880	174526	440048	91479	130248	74459	158951	26257	24840	80678	13962	27456	40770	59473	8094	329911	104710	31413	312213
2006	5	内蒙古	Inner Monglia	292069	171301	423852	93947	143900	73196	150514	26193	30924	83364	13895	26179	39588	58864	18517	331810	105864	31351	310653
2007	5	内蒙古	Inner Monglia	290960	173416	417716	93913	155651	72453	159154	26294	35597	85582	14784	26709	40239	63455	18683	335212	107868	31896	315567
2008	5	内蒙古	Inner Monglia	277455	172933	393337	97311	134085	68274	158522	24551	37490	90234	15067	29948	41685	65087	23748	343658	113247	32560	329096
2009	5	内蒙古	Inner Monglia	267714	178762	377575	100738	136943	65751	162429	22777	39079	99186	14467	28518	42445	68817	20562	342477	117475	32788	339773
2010	5	内蒙古	Inner Monglia	266890	184798	372494	101427	135521	67495	162826	23644	39103	101227	15442	28268	43454	72815	20455	347000	123003	33259	352793
2011	5	内蒙古	Inner Monglia	261925	205471	400111	110773	167148	75949	164026	26825	41958	104429	20054	29003	43963	77805	21234	346048	128357	32577	366270
2012	5	内蒙古	Inner Monglia	249880	214738	426678	119724	182466	79761	169479	28903	44060	107915	18434	31520	48820	78149	7260	347945	128753	32802	390408
2013	5	内蒙古	Inner Monglia	240787	215410	475162	133555	254938	113577	216843	45914	58542	110766	48378	43847	60952	81734	10038	351288	139262	34813	402583
2014	5	内蒙古	Inner Monglia	238322	203776	462809	139913	229116	105005	213081	42596	50222	113302	50271	44697	62159	82811	9229	353822	147767	35439	430180
2015	5	内蒙古	Inner Monglia	235519	179088	466873	142492	215754	96096	206365	40691	50240	115712	53951	46101	63212	80895	8715	351478	152511	34532	442433
2016	5	内蒙古	Inner Monglia	228845	165778	438517	145493	189409	89121	227777	36938	48486	117685	54800	42176	59023	82743	8340	350763	157028	35319	454180
2017	5	内蒙古	Inner Monglia	219661	141488	363066	136272	164265	86590	210957	36365	48245	117488	56294	53221	60063	83514	8674	352080	163356	37306	467406
2018	5	内蒙古	Inner Monglia	182322	135570	325414	139932	134117	83015	200954	31020	48823	145312	50355	50278	56278	82172	7498	342409	178291	32546	497998
2019	5	内蒙古	Inner Monglia	86179	144562	307896	146253	129394	82533	199034	28506	46988	206547	56656	922	70176	38688	7663	379095	192406	31843	583788
2003	6	辽 宁	Liaoning	267643	307408	1511188	170382	308744	196994	336682	61038	48470	187659	61981	81862	90560	105076	18578	523210	219669	55353	449111
2004	6	辽 宁	Liaoning	289175	311089	1504831	170610	308854	181910	332141	63409	50911	182710	63232	97000	94288	107124	20980	517811	212384	52297	465486
2005	6	辽 宁	Liaoning	287828	304953	1503547	169270	283012	168857	330240	61168	51156	182306	61825	94864	91304	108298	21308	513245	218725	52084	467462
2006	6	辽 宁	Liaoning	289231	301785	1472688	166276	294844	160892	338440	59478	51012	186951	64330	104092	96237	111149	21683	510585	225940	50901	473686
2007	6	辽 宁	Liaoning	299052	299930	1.45719e+06	170342	276492	142337	338364	64231	55969	196076	59824	99594	97547	116293	19651	509883	225530	49346	477364
2008	6	辽 宁	Liaoning	312985	335633	1469581	169502	284473	154789	337793	65386	61269	206469	65443	120212	101749	114203	20112	502781	242847	49874	492799
2009	6	辽 宁	Liaoning	276091	354627	1460104	162517	294679	171450	317787	67091	60775	201945	74586	100812	108198	114662	23744	508584	245118	54047	498662
2010	6	辽 宁	Liaoning	279344	351886	1.44823e+06	165861	311940	169184	302229	63793	70266	206506	88233	122209	119638	128253	28700	522950	256478	51052	494712
2011	6	辽 宁	Liaoning	265356	330724	1.67572e+06	170988	478874	220302	329403	73019	84659	224191	115356	125691	138620	142243	29956	551252	281221	52392	505789
2012	6	辽 宁	Liaoning	251729	325541	1683199	164475	609206	210939	328067	72453	90064	225181	123697	102079	158368	155501	26698	577745	304061	50533	527736
2013	6	辽 宁	Liaoning	233243	340321	1794581	164508	1120518	277169	376584	80807	127133	232089	140409	132564	168951	158882	27964	590603	333831	55375	535168
2014	6	辽 宁	Liaoning	231340	312939	1669224	158588	1023163	267409	375739	73650	129648	244410	145229	127876	169029	161113	28236	598762	344699	52506	538173
2015	6	辽 宁	Liaoning	224708	287466	1506278	145850	836715	257685	361120	67539	132887	260117	132944	118469	159093	158973	25620	579817	336683	50967	541018
2016	6	辽 宁	Liaoning	226549	247401	1.31733e+06	146877	646126	226351	351628	62184	125846	270029	119708	118773	138379	143686	24087	537140	313038	50434	538317
2017	6	辽 宁	Liaoning	214709	236861	1177764	139638	502194	204377	355545	58277	129036	283071	103637	115021	120652	132179	22826	503089	306642	46742	542544
2018	6	辽 宁	Liaoning	194652	216343	1121030	163492	377755	202133	329713	56057	128051	284729	104816	119744	104080	100455	32538	490428	311467	40605	638179
2019	6	辽 宁	Liaoning	171776	196287	1103992	157557	323985	188089	329225	50737	136899	335277	106964	3058	98107	74397	22809	509774	315333	45307	698927
2003	7	吉 林	Jilin	209069	149916	739370	81342	165404	146905	256349	28142	26061	95569	28285	33893	59863	64781	11662	359281	139182	44555	278931
2004	7	吉 林	Jilin	209734	148719	664020	80163	155411	152044	245268	31861	27500	92867	29135	38702	62625	64115	10284	366660	140204	42493	285816
2005	7	吉 林	Jilin	203166	134597	603770	79998	135004	95845	178745	30747	30921	92692	28373	32416	58311	69479	10043	368288	142537	37302	287000
2006	7	吉 林	Jilin	188010	168240	597256	81612	144516	93712	178280	29320	33063	89450	32609	29879	60594	67605	11940	376869	145617	37224	293293
2007	7	吉 林	Jilin	179649	176460	580098	79932	137659	87322	159437	29301	33574	91148	34731	34015	62017	71469	11461	372244	146530	38347	295429
2008	7	吉 林	Jilin	166065	176101	569681	80836	137452	84454	157337	29396	36413	93082	33685	35898	62589	74957	12731	376996	145591	37240	309728
2009	7	吉 林	Jilin	162252	182677	590414	80878	129397	82292	153194	31386	50929	98575	33516	40984	64424	77506	10650	370771	150225	36724	305804
2010	7	吉 林	Jilin	166900	155909	607685	81981	134348	89413	145051	30288	52094	102438	35819	44540	66694	81438	10998	366907	153156	37055	313535
2011	7	吉 林	Jilin	162662	147843	649457	89537	133745	93824	142939	31427	57888	105249	52924	43950	67857	84877	9003	368331	174508	37222	325315
2012	7	吉 林	Jilin	157076	166393	648257	88996	176383	95296	159175	30147	47340	109330	51316	48576	75965	81613	8769	372010	162699	36415	339025
2013	7	吉 林	Jilin	136648	153963	884034	140322	338694	128701	171587	32884	67365	110171	57257	54646	80272	83034	13236	370820	174007	35956	350820
2014	7	吉 林	Jilin	133150	142788	866905	134514	331902	125417	164287	30126	65783	114768	63078	57830	78792	81597	17057	366065	179470	34867	355766
2015	7	吉 林	Jilin	128394	140798	842307	129966	292636	113612	165889	29519	65502	118287	60067	49737	75372	83108	22497	361221	181289	35699	354720
2016	7	吉 林	Jilin	124934	130708	818555	123472	273170	116447	160708	28363	64105	120865	67708	57648	76412	85471	25393	361559	187229	35368	363348
2017	7	吉 林	Jilin	114313	122392	709399	118834	236805	114147	162482	27868	62903	121523	69040	67916	76755	84516	26152	360897	195881	36563	362182
2018	7	吉 林	Jilin	97037	94305	568936	101901	185207	112427	148656	23435	58228	134325	60579	66474	72945	71694	19786	359483	199091	36888	381836
2019	7	吉 林	Jilin	70077	86412	508180	103665	149271	104203	163199	23217	56054	174926	60516	1789	78456	67759	18181	371826	212478	33031	427548
2003	8	黑龙江	Heilongjiang	896888	386961	1136586	156309	405633	314098	325849	47579	39833	116501	44189	49006	87997	76223	36903	443677	170422	37194	380858
2004	8	黑龙江	Heilongjiang	894423	427977	1086961	154960	379913	279133	311849	38527	43531	113243	44575	48759	89745	75229	50335	429386	165318	37533	390638
2005	8	黑龙江	Heilongjiang	889003	451055	1025364	153690	362170	215531	278569	37716	41206	114617	42773	45943	93769	79002	50032	425042	170033	35952	392310
2006	8	黑龙江	Heilongjiang	905260	487905	994242	152375	361343	225545	276077	38681	44089	115411	49193	43775	97280	79986	51516	432926	174399	37532	397895
2007	8	黑龙江	Heilongjiang	956910	488384	987024	149560	351855	213436	273327	36920	51211	116241	51189	43003	104078	82370	62012	440853	178791	37820	400068
2008	8	黑龙江	Heilongjiang	944111	439966	843675	145959	301221	193119	260091	31890	55013	121792	43625	42409	112379	85469	57876	442704	182677	38209	408471
2009	8	黑龙江	Heilongjiang	928932	428056	786306	147709	299135	183445	261497	32713	53257	134821	42734	41660	114405	92396	58915	451575	185067	38809	409169
2010	8	黑龙江	Heilongjiang	929199	422324	667652	143476	270259	177025	251840	36667	55829	141723	49179	59256	120058	97157	65029	461453	196615	39458	415747
2011	8	黑龙江	Heilongjiang	939292	434887	656688	146002	305816	163855	256259	37843	61206	146744	56163	50485	121715	101860	51023	458708	203964	41067	428410
2012	8	黑龙江	Heilongjiang	932627	413269	633458	157331	356205	159010	256089	45601	61105	160117	58534	48877	118926	102162	43857	469553	209837	42390	440886
2013	8	黑龙江	Heilongjiang	798991	384127	649885	182837	372165	197209	280785	48516	71042	159235	60459	59292	111528	101630	46702	452220	223008	45747	432532
2014	8	黑龙江	Heilongjiang	710984	359280	613082	180958	338497	187443	277461	45246	76385	169005	60346	62055	115422	101503	42642	453708	225950	40981	447880
2015	8	黑龙江	Heilongjiang	655137	318638	573524	180621	311202	182075	274955	41511	73769	187020	59870	62900	111809	108794	43100	442622	223709	39965	443930
2016	8	黑龙江	Heilongjiang	667985	279101	519865	176015	284420	186170	271327	40433	72891	213468	61337	68933	111223	111348	39937	430329	229192	39209	445531
2017	8	黑龙江	Heilongjiang	677202	255592	456676	168343	247003	177763	270041	36859	81555	226548	62550	79775	106923	109521	39102	417976	231389	38244	447074
2018	8	黑龙江	Heilongjiang	656214	268514	386097	136521	214861	156808	250300	32438	79656	217173	64203	108374	91742	103924	42349	409036	229921	35017	443412
2019	8	黑龙江	Heilongjiang	407217	234219	301119	144566	174291	111888	257628	14195	88156	234283	57983	616	86370	67099	28329	396144	249073	28254	479504
2003	9	上 海	Shanghai	16686		1270417	56388	141015	266985	348139	85191	42267	148430	83268	149673	103111	55055	41339	250091	143281	48239	171241
2004	9	上 海	Shanghai	17018	601	1202269	55914	129767	256877	343244	85294	39546	134634	84676	141780	112849	49970	38022	252764	149302	46427	170541
2005	9	上 海	Shanghai	14753	563	1186823	54464	132682	244275	328091	77532	42369	158334	81995	149091	132096	50805	39822	256504	154681	44511	182846
2006	9	上 海	Shanghai	12994		1177079	53539	128585	219972	321882	76773	44296	171376	78557	171950	141123	53163	37257	257704	157250	44684	176529
2007	9	上 海	Shanghai	13401	697	1420853	54115	126550	228460	331253	82389	51840	193211	95501	178620	156299	53823	37318	262327	161416	44308	180232
2008	9	上 海	Shanghai	12148	837	1.43037e+06	55062	110804	241116	340486	98469	56254	206546	106638	183420	181302	57101	40314	271035	159653	43933	176744
2009	9	上 海	Shanghai	13261	897	1407073	55589	110132	254025	356329	108191	65150	217125	114816	180026	209104	62115	38569	267447	166032	45675	182518
2010	9	上 海	Shanghai	15361	866	1413166	54099	113395	264288	363014	116677	67134	236320	111507	186433	232486	58657	32955	261381	167159	47142	186685
2011	9	上 海	Shanghai	14023	535	1868255	61079	367537	475247	410319	167080	82032	277838	154854	184489	123615	62650	23978	277345	176761	51590	194011
2012	9	上 海	Shanghai	12254	542	2187271	58306	488552	598371	379549	201344	85528	294556	152019	172215	122304	61745	33034	279905	173800	51057	204944
2013	9	上 海	Shanghai	13418	526	2117904	52418	371768	668956	491586	210544	216511	300312	240280	420924	203890	81138	51049	295015	188422	58854	204859
2014	9	上 海	Shanghai	23664	594	2060958	45872	372836	780104	513694	243925	247810	330296	255863	489161	225405	85721	66462	294243	190277	56664	205210
2015	9	上 海	Shanghai	24828	615	1929316	42756	351496	782158	514541	240034	254422	337397	262148	519981	225200	83318	64942	290946	188934	56115	203181
2016	9	上 海	Shanghai	24796	523	1810460	43719	329297	783592	510827	242978	267844	355147	253806	521972	231873	85936	63045	296841	189476	60328	205302
2017	9	上 海	Shanghai	27646	545	1720932	41367	312508	800561	511430	255494	307312	341780	267351	554411	245506	86987	74547	308006	191078	64103	211526
2018	9	上 海	Shanghai	30995	662	1.61723e+06	39946	304748	844687	505838	304811	355812	333912	265978	578744	268938	92639	71308	318756	193579	58636	219438
2019	9	上 海	Shanghai	76301	1186	1434850	34752	323785	989864	504331	299079	417680	378824	301223	21508	362050	106200	109277	400520	283931	75051	297702
2003	10	江 苏	Jiangsu	181408	165596	2254737	127061	263755	379023	344743	78914	57177	215092	66979	80676	83947	107361	19667	800490	286999	54105	517396
2004	10	江 苏	Jiangsu	164816	149777	2315379	138365	243377	316571	332725	84248	60196	229354	63350	81884	88448	98232	15394	805080	293265	51087	536939
2005	10	江 苏	Jiangsu	154554	149100	2515686	140527	269962	288869	329808	86140	64625	222283	57886	91372	92422	99573	12051	817836	298771	50095	546672
2006	10	江 苏	Jiangsu	146328	146998	2908478	130166	372339	273008	327445	87702	67894	229014	58774	89198	92161	102136	11621	833641	305913	50016	560894
2007	10	江 苏	Jiangsu	139008	135306	3102738	133245	382241	265704	324183	91484	70404	235140	60532	88373	91976	106807	11671	842335	318464	51263	575961
2008	10	江 苏	Jiangsu	121573	135854	3073609	126598	383523	272603	319672	98820	72688	250466	59640	110073	93868	111745	10806	843124	329619	53883	608249
2009	10	江 苏	Jiangsu	105061	136706	3082048	128501	460405	277179	306981	104732	73279	266215	64900	114637	98455	114587	11872	845617	344183	55827	622262
2010	10	江 苏	Jiangsu	99310	125681	3.35465e+06	129007	523463	290309	312346	106410	86533	269023	73098	120431	108597	122790	10449	854818	363225	56732	630662
2011	10	江 苏	Jiangsu	93509	128508	3536940	132141	651904	320915	313515	117271	99224	289413	79312	111760	119582	129930	11097	870790	396637	60238	650067
2012	10	江 苏	Jiangsu	86041	128306	3596736	128678	695026	334759	306102	119385	107862	293585	82260	123202	127822	132693	12609	888493	411158	60722	673930
2013	10	江 苏	Jiangsu	66017	136190	5554442	181362	4205275	613948	484064	191980	304579	307892	211881	318584	192155	140325	35732	894699	438712	77194	677469
2014	10	江 苏	Jiangsu	63023	117656	6123192	181179	4501977	593568	497774	197569	290372	333209	221396	312336	215073	149608	37532	946157	466714	77718	697969
2015	10	江 苏	Jiangsu	58330	106039	5951956	173926	4173319	586032	492318	173429	282597	350513	226451	313181	217656	154540	33472	959780	479324	77700	710217
2016	10	江 苏	Jiangsu	56166	85487	5674230	145111	3967734	561091	496425	168972	273185	380797	222448	294356	218060	154435	32066	949661	494518	78676	719622
2017	10	江 苏	Jiangsu	50713	73175	5432118	147947	4.06977e+06	538513	481339	165628	279156	403481	230320	302471	220376	148761	34594	939600	512162	80008	735841
2018	10	江 苏	Jiangsu	38572	64954	4975454	141915	4340438	555806	460396	180358	320043	394001	253675	335011	218056	122058	37073	921218	499874	78856	788144
2019	10	江 苏	Jiangsu	27116	40259	4537372	142893	2700651	604790	483382	191693	324252	388932	290991	10373	272684	132263	49492	1103491	593721	92305	885474
2003	11	浙 江	Zhejiang	26974	17159	1114933	90239	518550	206594	197247	88419	48027	183401	50269	103463	70638	53394	8730	496793	224007	45305	383917
2004	11	浙 江	Zhejiang	24374	16719	1.5425e+06	94688	696200	197308	194399	91746	49173	186856	55479	109429	69437	55437	8681	504110	229759	47012	392382
2005	11	浙 江	Zhejiang	18331	18101	2033937	100658	825433	192372	193389	98288	49316	191036	61736	142401	74210	58921	9775	515347	239318	46066	442561
2006	11	浙 江	Zhejiang	16778	16816	2455019	109788	1012690	202938	198409	107838	63304	202510	70038	176958	83807	63122	10394	534805	252385	48321	482521
2007	11	浙 江	Zhejiang	15801	14963	2847324	110273	1057705	210014	205085	114090	72385	224000	83160	170421	89097	68067	10228	549868	265872	52981	505554
2008	11	浙 江	Zhejiang	15751	15876	3192328	121723	1217263	246828	220742	143125	88726	254760	93059	204153	95745	73527	12533	559483	280639	51696	524000
2009	11	浙 江	Zhejiang	14865	16593	3330811	124685	1558483	280892	239385	149333	100300	279838	103919	239592	104800	83033	15821	578354	298085	59083	561439
2010	11	浙 江	Zhejiang	14444	17399	3.51699e+06	125864	1801993	310371	252133	156029	111581	294164	136451	260081	140155	109052	16298	611068	324320	62055	575474
2011	11	浙 江	Zhejiang	14911	15575	3767476	138782	2367182	378794	274113	181447	125558	318802	152819	277104	154818	119080	16840	635116	353443	65956	598861
2012	11	浙 江	Zhejiang	8183	13956	3724790	132999	2940726	392572	293640	163226	140702	363777	174563	292128	174846	129023	19990	662361	373721	67442	632582
2013	11	浙 江	Zhejiang	7534	9722	3.57949e+06	135425	3032323	401941	313698	147032	153530	363239	179474	288068	159922	116694	21928	684004	394496	71604	656007
2014	11	浙 江	Zhejiang	5613	8562	3505533	134227	3294524	417255	326864	138387	164351	379631	197468	284101	161018	116840	26210	700763	416306	72087	677017
2015	11	浙 江	Zhejiang	4743	6999	3305956	109841	3.23417e+06	421016	319560	134950	170607	423045	200523	279102	161471	115551	24795	709447	437271	74117	700914
2016	11	浙 江	Zhejiang	4262	6039	3159131	119614	3101168	376337	315270	134500	186104	463846	208787	289528	186126	106459	22543	714036	442875	68156	704676
2017	11	浙 江	Zhejiang	4633	4707	3150247	123410	2883413	382562	317777	140195	230198	484530	216161	301544	189584	102643	25767	743304	460479	66870	717013
2018	11	浙 江	Zhejiang	4325	4194	2893362	122063	2799243	368224	301129	137956	218467	449714	224209	290834	166441	101088	23981	752545	474175	71104	732270
2019	11	浙 江	Zhejiang	5171	4490	2867839	110641	2123613	396667	312307	145986	243579	475622	267975	7305	180276	112703	36820	876427	512784	80038	764297
2003	12	安 徽	Anhui	121655	295648	794706	86848	291515	226637	171202	35855	27363	118977	24893	35126	51079	61555	11578	558529	168077	43268	421199
2004	12	安 徽	Anhui	106024	304244	709124	90998	268545	199512	170641	33978	29427	118593	31173	36360	51171	59248	12156	564436	172772	35175	420840
2005	12	安 徽	Anhui	94027	284654	683153	93056	276957	174750	161033	26654	31926	112238	31896	42553	52911	57330	4648	574949	176617	41789	432189
2006	12	安 徽	Anhui	81314	298571	690034	95552	313248	152332	150773	26437	36128	115846	30839	42543	51904	60482	4289	582570	181523	34988	433409
2007	12	安 徽	Anhui	81418	288320	703270	95278	327121	151027	152067	30849	35065	120098	30237	52938	53267	61989	4418	584282	187371	35396	437668
2008	12	安 徽	Anhui	74597	292540	673032	98228	342104	137617	147974	30971	34686	130866	33345	51577	56334	63494	4714	586766	196000	35360	446969
2009	12	安 徽	Anhui	62454	303042	706086	94288	406961	134576	147374	37369	37374	145353	43543	43270	60046	65458	5711	595637	215372	33199	461455
2010	12	安 徽	Anhui	61393	321148	760144	95966	421286	139711	151386	36886	38045	146894	48812	46287	66790	63752	5305	604859	219857	33973	466882
2011	12	安 徽	Anhui	59674	340343	855255	97528	584263	155140	167013	39370	43665	160433	61461	48457	75487	72045	4589	616223	231028	32891	470652
2012	12	安 徽	Anhui	53814	346114	909353	98776	699418	159247	163223	43362	45481	168299	69098	36761	82104	80841	5635	632551	253210	35859	485145
2013	12	安 徽	Anhui	49105	331031	1204329	119807	996751	225593	220051	57923	62069	172355	93760	70975	83257	77550	8954	636541	271532	33778	481337
2014	12	安 徽	Anhui	45149	313318	1226224	108415	970835	234400	217155	59848	73792	176627	103962	60156	95837	81613	9458	647092	281553	33561	478391
2015	12	安 徽	Anhui	43724	270442	1209481	103486	926497	236454	222641	59516	76545	191154	104170	62514	91748	81562	8709	643548	290713	32428	482603
2016	12	安 徽	Anhui	42426	230563	1223624	104472	917769	231913	229305	59484	80122	222630	104582	66317	90792	77947	9521	645533	305457	33637	494437
2017	12	安 徽	Anhui	37994	202600	1197691	101956	932566	227220	242102	54129	81924	236855	111925	73576	88962	70178	10032	636051	314635	31916	509791
2018	12	安 徽	Anhui	31171	190349	1395231	102702	1393958	230068	245180	63520	93312	240999	146706	87703	93251	61224	13149	640925	324585	33279	535987
2019	12	安 徽	Anhui	31548	142775	1276915	104110	1110593	269985	237028	57873	92564	232291	176204	7554	106239	83198	21977	694866	355789	37389	595834
2003	13	福 建	Fujian	77502	35773	1538910	80725	264008	123842	141942	41632	36745	94607	35472	36230	37495	32473	12990	425026	113211	30993	286717
2004	13	福 建	Fujian	74943	39592	1.83231e+06	82334	272602	114261	150635	47365	36195	95640	43764	41687	37959	37230	12598	422659	117578	31716	285715
2005	13	福 建	Fujian	75103	42159	2001744	80793	305938	110468	149953	48557	34741	98821	51117	49111	39362	38274	11978	423181	122393	32036	284932
2006	13	福 建	Fujian	69957	44536	2177208	81930	362624	114883	151496	48568	41457	99472	59513	57472	41365	39266	12612	425404	127650	33341	285534
2007	13	福 建	Fujian	69756	45884	2277162	80205	443282	118649	147863	56170	41386	99922	69181	63777	42735	41783	13270	436678	135506	34017	287669
2008	13	福 建	Fujian	66667	48231	2237690	94560	450131	123383	159167	56266	38575	109572	72352	109969	45428	41886	14902	442982	142133	37564	295470
2009	13	福 建	Fujian	68444	51007	2264122	96043	519644	131197	161943	61131	40923	121587	87748	104289	47867	44403	15055	437276	152273	36643	298010
2010	13	福 建	Fujian	66839	47920	2412046	92339	624024	138617	166591	75834	46460	129221	90291	122881	54304	44317	14312	447065	157454	36928	303952
2011	13	福 建	Fujian	60972	69121	2.82984e+06	95320	999451	201270	178677	87380	54282	135976	91057	66038	57105	47316	13135	460544	171383	37982	306486
2012	13	福 建	Fujian	48172	53174	2.92378e+06	94754	1216984	242500	186432	94038	53301	147544	101843	59998	65357	50016	13882	466851	181116	35522	343289
2013	13	福 建	Fujian	45443	27679	2525538	88735	1461936	263668	243483	98117	69597	151274	126067	114253	77321	54794	13550	482251	197517	39663	359371
2014	13	福 建	Fujian	45228	25258	2452890	90840	1547528	269955	240407	99258	70972	164797	143210	117123	84804	57716	14909	500916	209681	40496	370418
2015	13	福 建	Fujian	44826	25034	2354738	90304	1629349	283603	245012	97973	89967	178754	152905	125623	85735	55336	17775	503291	215596	43091	391878
2016	13	福 建	Fujian	43384	20674	2282819	90596	1685408	278203	234009	97672	91104	195733	156043	144909	87225	56246	27023	521430	228475	42166	405138
2017	13	福 建	Fujian	42353	19870	2131199	87224	1767182	287293	239153	99713	108489	208204	156379	162753	77990	58391	37932	530724	239755	43439	426796
2018	13	福 建	Fujian	35783	13254	2136479	115061	1970155	295491	230380	110633	122669	200338	171106	186322	77208	56992	31426	546744	237633	43410	472484
2019	13	福 建	Fujian	14847	13991	1707936	113779	1636852	247294	228697	91868	107821	251568	173543	1895	78782	69203	34723	607427	257549	41867	519142
2003	14	江 西	Jiangxi	165955	98465	607054	93414	181401	136572	162946	21521	24903	86346	19919	16870	49443	41766	9530	430516	129894	33073	367291
2004	14	江 西	Jiangxi	160759	88436	626956	93230	205436	113667	165672	21556	27213	89369	24126	16834	52460	45519	7324	446947	134846	31652	361540
2005	14	江 西	Jiangxi	148188	88268	640240	94797	223987	101967	160792	23849	29327	86838	23926	25226	55166	43359	5665	457229	140612	32597	373517
2006	14	江 西	Jiangxi	147773	95556	679790	94713	219836	101351	160288	24807	31031	88245	26573	21942	55428	49518	6003	464855	145505	34687	379648
2007	14	江 西	Jiangxi	147707	89227	702638	95174	253563	88751	163159	18808	30658	85343	24810	21740	54819	48012	5790	467331	149145	36917	384121
2008	14	江 西	Jiangxi	137350	100909	701868	87328	252495	88640	163269	19046	29312	89035	20766	44701	49344	51095	4877	451331	151560	32722	416677
2009	14	江 西	Jiangxi	126940	84838	680148	95753	274292	83340	156240	18004	36140	99777	20257	27224	49582	51135	4836	467047	160294	31703	428709
2010	14	江 西	Jiangxi	120860	89831	715888	94785	294090	78752	152611	16188	33218	105030	21075	29199	50556	55932	5015	476499	167768	31678	435020
2011	14	江 西	Jiangxi	108456	89664	877764	102643	495304	130583	139630	33249	32151	108882	36015	34524	55156	53769	4995	477854	173707	28610	461028
2012	14	江 西	Jiangxi	116386	101209	1020243	105199	666329	166946	128752	42521	43445	106257	44548	29438	54343	58985	5891	442133	211067	38742	475500
2013	14	江 西	Jiangxi	55802	83298	1258497	131941	913309	155961	212442	46930	63475	112662	54294	55354	56714	73794	5679	457603	196605	33092	482617
2014	14	江 西	Jiangxi	51562	77688	1335144	142956	944074	176041	207779	40841	71548	121773	57252	47074	55378	71048	8160	509344	215115	30291	489548
2015	14	江 西	Jiangxi	49010	72117	1382370	141223	919151	181054	211666	44210	67028	125759	63593	52008	57064	76877	9795	557972	245125	37789	511136
2016	14	江 西	Jiangxi	44573	57787	1.41754e+06	93092	903979	173184	202987	42621	55967	130064	67068	53511	61517	71270	9908	519625	247726	42201	520102
2017	14	江 西	Jiangxi	42538	45907	1309710	92428	876903	178055	205494	42415	62728	132636	71111	64680	62268	76784	11028	534426	258525	34043	533730
2018	14	江 西	Jiangxi	37538	31404	1064654	90128	869585	151613	189897	33111	55363	143764	79940	57802	61402	58010	7090	556342	261154	29236	579398
2019	14	江 西	Jiangxi	21353	30402	1075153	94250	834108	159695	183204	35608	54661	202209	94151	2000	63819	50664	8830	600572	280304	30167	625537
2003	15	山 东	Shandong	93708	607939	2720306	205455	387290	431156	307797	91790	58472	254284	52254	78923	74886	104828	12163	1045715	349142	54620	854199
2004	15	山 东	Shandong	88415	607422	2818189	209928	437354	389713	307018	87604	55829	250816	53482	81992	73970	107608	11546	1057302	346984	58583	877469
2005	15	山 东	Shandong	65142	615758	3366946	202320	682219	397962	294570	117980	57984	246104	85452	108028	81390	114205	30916	1044783	354123	56939	987019
2006	15	山 东	Shandong	57062	622056	3451372	198499	692063	361762	295376	112983	54302	248396	81513	106075	80640	108351	32024	1054050	359296	58634	1001323
2007	15	山 东	Shandong	56007	603963	3463227	198712	710453	356633	309240	111555	53893	264288	86225	108320	87569	111914	30370	1070794	377011	57803	988303
2008	15	山 东	Shandong	52225	620742	3401231	198750	657091	365769	307275	115263	57695	293492	84107	112591	88917	113461	34548	1058407	387790	60068	1005043
2009	15	山 东	Shandong	51682	630909	3372251	205132	704565	404239	332476	116516	62031	328027	93545	117330	100386	111361	33499	1059537	403966	64063	1031073
2010	15	山 东	Shandong	50501	667808	3463537	203573	802723	382277	346895	110249	65508	332428	113859	119025	109649	116100	35321	1091020	434664	66728	1050155
2011	15	山 东	Shandong	47830	734199	3722442	208032	1219431	482089	356610	136045	83677	346174	133691	103427	107541	119883	35835	1079198	464129	65891	1058309
2012	15	山 东	Shandong	27503	788229	3.94977e+06	210364	1368363	489339	373826	152025	91302	327436	158165	115348	124222	125086	39446	1098223	496009	68831	1098219
2013	15	山 东	Shandong	17962	746032	4371586	238516	1886478	672577	506405	192581	175437	347552	236862	208205	168827	149280	32774	1200518	561548	72039	1120817
2014	15	山 东	Shandong	16527	711535	4257505	237192	1775076	628241	497497	155794	169694	388285	255766	215537	184178	167510	31405	1203473	586860	71350	1109967
2015	15	山 东	Shandong	16817	645096	4175431	234703	1636800	598943	483949	140370	174352	415604	260826	214938	179784	182523	31072	1171801	606898	69688	1127558
2016	15	山 东	Shandong	15625	573810	4032137	230937	1603341	570855	493858	142149	182471	454491	267530	206966	177964	175967	32264	1171795	624603	70043	1127754
2017	15	山 东	Shandong	13845	513391	3832194	260819	1.59947e+06	526874	476881	140614	188821	461369	260729	218321	183236	180512	31342	1166027	642063	71174	1161762
2018	15	山 东	Shandong	7136	402933	3.41863e+06	256284	1590959	498933	475862	123434	180143	464620	253243	176609	172828	204415	29144	1129595	657289	70962	1176523
2019	15	山 东	Shandong	12003	297468	2717305	279260	1504759	467200	446500	116374	173099	556364	259873	5861	181539	178065	33423	1213782	705907	68575	1279931
2003	16	河 南	Henan	96324	487152	1599172	231431	617075	589237	329390	98017	53134	211082	45617	83354	107296	103727	15596	1.03837e+06	317984	69984	922977
2004	16	河 南	Henan	90608	486222	1520735	219749	642232	532368	333419	94946	51231	211898	45908	93026	110891	104512	17180	1.04752e+06	329731	69391	957490
2005	16	河 南	Henan	95336	492319	1552407	216847	647974	481787	329044	109989	48391	209167	54584	102735	110856	105779	14835	1072214	330894	59736	970733
2006	16	河 南	Henan	88051	492862	1590850	219274	712438	460318	315045	106537	50569	207198	59262	103596	114068	113372	17175	1096008	341185	70214	954543
2007	16	河 南	Henan	86895	504024	1571067	211526	777798	431061	309578	100403	45788	223224	69447	104493	115580	116973	17998	1115982	352410	71715	965848
2008	16	河 南	Henan	79420	503340	1536464	204282	806406	410099	294190	90713	39947	214906	69193	123821	119469	116049	16674	1097802	361694	71637	988053
2009	16	河 南	Henan	69663	533243	1547755	206703	873204	388816	287767	95304	52037	220203	85703	120514	110772	115365	17706	1125064	388513	71015	1037958
2010	16	河 南	Henan	71223	526480	1588235	210900	936620	381887	291456	99471	48658	225973	89734	112886	114937	122182	19387	1141093	408455	69958	1057238
2011	16	河 南	Henan	72511	636690	1938204	214574	1160597	427339	302415	105343	58671	238102	116381	111354	122544	128887	19221	1173951	432114	70920	1061064
2012	16	河 南	Henan	58276	630007	2182526	224991	1255783	425923	308906	101005	63358	233242	131032	112912	131169	131293	15968	1189032	461225	71197	1083981
2013	16	河 南	Henan	51860	625749	3126681	245582	1894751	526618	436185	118169	94622	241291	157641	124877	148175	124356	19926	1169195	484395	85062	1084731
2014	16	河 南	Henan	50902	563443	3371025	255263	1.89609e+06	532606	444852	112450	97236	239776	183979	150673	163859	131980	23911	1190488	500183	74701	1105521
2015	16	河 南	Henan	25258	516407	3528840	253207	1.78829e+06	549146	452694	112724	104292	243547	211651	161105	171527	135179	27051	1249991	552176	78237	1097200
2016	16	河 南	Henan	20827	451781	3.63257e+06	261791	1733718	561294	458357	109991	121649	299962	231375	181284	177763	130455	31206	1245544	584493	77922	1137940
2017	16	河 南	Henan	18260	402855	3532353	257234	1703341	513540	451730	103916	132086	296542	268183	195668	171205	135705	33926	1245243	599141	77473	1155082
2018	16	河 南	Henan	13526	342128	2333621	244761	1694384	367302	392692	79100	128302	281913	234795	163675	139643	134124	22172	1195289	626353	71146	1208515
2019	16	河 南	Henan	20638	296008	2220790	235358	1530621	368204	411917	77918	166283	295124	280112	6961	175704	135669	27419	1214592	660548	67773	1230933
2003	17	湖 北	Hubei	304805	112073	1491187	127255	301104	294830	317975	100974	37013	133150	44084	85412	98193	86849	12578	636920	247475	59399	532676
2004	17	湖 北	Hubei	326656	123268	1503141	123399	352027	274609	300686	94622	37589	129081	50283	74256	96476	89626	13829	641726	251310	62701	553786
2005	17	湖 北	Hubei	306739	129837	1460195	130438	441496	275569	293331	65875	45303	131053	59424	64263	95025	94243	14202	648037	257632	55483	549825
2006	17	湖 北	Hubei	291618	130705	1.52198e+06	128510	517594	230361	276803	79003	58347	130112	57177	61399	98413	96257	13782	652512	261379	48789	547818
2007	17	湖 北	Hubei	208828	96356	1154326	122741	587605	182569	306666	46455	42809	147921	38851	49552	95083	91345	13131	644246	260633	50017	525413
2008	17	湖 北	Hubei	177224	100720	1124508	123635	617230	192328	322127	63152	41152	141385	46976	47899	100693	84246	14836	645106	267252	48509	543564
2009	17	湖 北	Hubei	157880	88073	1185083	119904	698228	201409	318290	66029	46199	158556	57341	45963	106541	83904	12384	646470	278232	50981	549359
2010	17	湖 北	Hubei	138358	98602	1385297	118585	724781	214645	254154	76740	45379	161069	65850	51349	108268	89392	12007	657018	300924	50673	549510
2011	17	湖 北	Hubei	93796	129826	1682169	178160	1.03139e+06	273513	255756	81947	56440	157610	81105	44646	116088	89894	15259	659129	313491	53513	546798
2012	17	湖 北	Hubei	97064	119741	1605899	181825	970679	301322	243822	92495	56419	163344	99606	61644	134697	97879	14820	718458	342216	63476	614628
2013	17	湖 北	Hubei	90963	89496	1908595	181323	1403952	417166	331914	121907	90969	173200	119695	89918	151167	93377	16674	681454	372202	55686	575463
2014	17	湖 北	Hubei	92630	77842	1933310	166121	1441509	402905	344273	106062	105357	179869	123581	93731	151705	103565	15851	693559	385985	56928	593173
2015	17	湖 北	Hubei	92051	70793	1.89421e+06	163051	1385035	393599	344077	99496	114659	194686	131236	89727	162804	113521	15578	738720	418036	63056	638997
2016	17	湖 北	Hubei	102999	64931	1860597	163792	1403585	397230	349680	93548	123274	209698	148977	105136	158489	114037	14343	729414	434794	64532	654107
2017	17	湖 北	Hubei	103399	55124	1.68395e+06	157154	1337790	390629	353677	93575	127373	215371	161531	109955	154173	111550	15115	713927	443352	71928	650603
2018	17	湖 北	Hubei	97245	45221	1400839	150985	1245703	367713	348065	82964	135036	199345	163790	134471	157673	115391	16508	692991	438088	67431	674036
2019	17	湖 北	Hubei	89990	40208	1342883	146028	1196865	369327	309869	88370	180833	202045	177026	4268	169692	117521	25269	705748	416712	58967	722885
2003	18	湖 南	Hunan	181408	121555	799984	113836	312460	195381	255213	54663	47575	141064	32358	56504	67774	69461	7145	656509	229716	64680	609081
2004	18	湖 南	Hunan	109473	113275	784526	114754	330607	185750	237798	59697	42696	146232	38784	61018	63034	72177	5443	676883	231647	41250	620776
2005	18	湖 南	Hunan	85457	108069	811036	105704	531338	138723	223855	70030	41678	136924	56083	45150	59245	66153	6658	662414	234974	39501	639975
2006	18	湖 南	Hunan	85282	109533	816318	107420	584759	123580	219595	70171	43967	139720	61933	48561	62667	71475	6978	670665	242631	42447	647582
2007	18	湖 南	Hunan	78246	112342	870261	105365	670743	126654	228012	72268	44915	149824	67258	51391	64358	73303	10638	676269	254196	43748	653734
2008	18	湖 南	Hunan	91436	132099	911491	115208	669178	150026	223652	79119	51944	163597	77499	57340	68027	79626	11298	683180	264685	43870	673643
2009	18	湖 南	Hunan	51569	150109	987284	115935	716541	158584	217596	82786	49390	172812	82745	72505	75822	82019	13259	683491	290442	43034	764250
2010	18	湖 南	Hunan	52909	153521	1062435	121841	755701	162542	210287	90403	56700	186436	96974	83830	83325	86746	14916	701544	310625	45782	780474
2011	18	湖 南	Hunan	53817	153472	1290418	143111	873375	173261	231570	90557	68597	203600	92819	86753	84832	89388	16697	714677	328535	52171	766685
2012	18	湖 南	Hunan	24170	151897	1281843	156673	946016	187470	236033	95143	70520	207382	99429	87608	94727	96655	15144	719767	347902	49510	806970
2013	18	湖 南	Hunan	22820	154984	1342319	166432	1073926	233409	245341	95422	73190	212003	111602	89867	123505	95553	18860	721568	363808	50505	814798
2014	18	湖 南	Hunan	22389	125879	1306525	165349	1079229	206987	251949	84960	76234	223754	119510	90611	129240	94958	17631	736690	381088	52653	813409
2015	18	湖 南	Hunan	23780	102625	1217533	173191	1062766	212626	244052	83430	72408	240419	123570	98431	115434	83879	16648	672486	374996	54695	818482
2016	18	湖 南	Hunan	21088	81486	1092880	166248	1087414	202351	239892	74396	74037	253367	121540	98775	117432	81784	16950	677330	393986	56584	826528
2017	18	湖 南	Hunan	25374	71491	1090427	157411	1102074	193409	234487	68249	69322	267211	126582	103256	114194	73344	15048	669407	403019	56603	816542
2018	18	湖 南	Hunan	21663	53397	952652	148630	1068197	202375	218832	62689	67925	276451	124597	98002	111786	82604	14763	676239	410861	55125	815947
2019	18	湖 南	Hunan	13519	49950	943008	151016	1050239	216982	259488	62874	81410	356776	140727	2100	133530	95226	23016	840888	459319	61982	888041
2003	19	广 东	Guangdong	132348	40198	2837913	195846	546082	408542	437376	198513	117411	281826	144964	155554	92988	112397	29650	924415	346001	70121	739221
2004	19	广 东	Guangdong	120254	38772	3.18146e+06	197276	550657	394731	450525	210300	126286	291168	174635	168078	106878	110852	34414	953184	357994	73322	766438
2005	19	广 东	Guangdong	106417	32523	3599821	195534	585929	405613	473122	221535	140288	298905	208857	234864	123190	119148	41596	983624	382443	81996	807272
2006	19	广 东	Guangdong	102688	33405	3910713	202399	603628	398188	482778	230702	149034	304590	228523	255734	130848	124291	45029	1.0123e+06	401035	87674	840832
2007	19	广 东	Guangdong	98916	33970	4229840	194120	601338	404642	487730	239101	158217	323535	238582	263673	142256	129323	51275	1031724	418219	87605	880567
2008	19	广 东	Guangdong	98922	34321	4164723	185354	595859	408375	492708	241281	162076	354830	240886	269402	150784	132664	54404	1057211	440303	89057	905545
2009	19	广 东	Guangdong	91964	33348	4434591	185085	631542	407583	535351	237172	167264	374885	260846	285329	154053	136053	59424	1090172	462753	89515	913392
2010	19	广 东	Guangdong	88150	33930	4766581	187585	643889	426028	560969	252327	175707	411676	290336	300637	180596	140123	64015	1123191	502531	94467	942475
2011	19	广 东	Guangdong	82179	32113	5189655	198558	926834	555792	618479	289944	197352	460858	333786	317292	185838	143759	68332	1161225	538938	91995	989298
2012	19	广 东	Guangdong	72251	34437	5409380	200800	1075838	649729	617985	322825	185936	475908	348584	370268	212508	143060	58402	1176919	561089	94666	1029262
2013	19	广 东	Guangdong	61724	29402	10202491	321821	1622781	955253	833076	393419	332575	433282	524731	557825	295214	162777	72523	1186341	559297	108650	1.01663e+06
2014	19	广 东	Guangdong	56702	29903	10151605	308037	1.49406e+06	958407	853999	370551	346340	431507	558406	606066	319277	172821	74861	1244966	596787	115244	1043254
2015	19	广 东	Guangdong	52841	30225	9810051	307096	1415548	968168	827938	371189	353120	460716	590938	646839	347323	174054	74388	1255092	613293	116093	1065482
2016	19	广 东	Guangdong	47749	27882	9596959	312727	1432627	1027835	811332	370486	435099	518184	618253	711755	322682	168570	77464	1256021	634840	117919	1087303
2017	19	广 东	Guangdong	45941	24535	9293607	299182	1542107	1026534	833312	365200	498638	488928	663147	761055	338641	172419	89551	1274604	658223	114500	1140892
2018	19	广 东	Guangdong	41200	21791	8824778	279553	1690284	1078159	864093	406566	607831	612993	770681	787959	378310	186335	106778	1301440	678780	105332	1198506
2019	19	广 东	Guangdong	23974	17478	8358409	257061	1327743	1147228	825844	406078	662368	843755	859619	24104	472907	180497	129351	1623588	829139	134073	1421251
2003	20	广 西	Guangxi	140544	47509	575832	82958	168081	149086	174543	50863	27023	80444	23491	49658	44825	46313	7160	542976	154598	29542	321916
2004	20	广 西	Guangxi	138796	48445	573125	82281	192646	144451	168619	46019	33540	78143	24165	55464	47488	48560	6730	546290	159507	33964	333788
2005	20	广 西	Guangxi	136726	51901	566824	79874	225666	136684	174213	47820	35650	79077	31383	58929	53488	51673	7205	548860	169959	32749	346856
2006	20	广 西	Guangxi	134910	49509	566151	80608	213854	128106	174720	48474	37718	78970	32744	61191	54196	53323	7515	551658	175430	32171	353685
2007	20	广 西	Guangxi	131627	51423	576183	81579	218475	120893	181051	44976	33807	85433	33511	66525	55846	60970	7323	551635	185272	31255	363204
2008	20	广 西	Guangxi	121342	54231	584381	85147	235635	118160	174922	44627	33099	87855	35888	70345	59597	63993	6714	557955	193487	30879	369834
2009	20	广 西	Guangxi	109642	43386	592296	88110	275516	115863	175170	44798	35333	93953	37307	82906	63988	68850	7110	561241	208482	31185	379016
2010	20	广 西	Guangxi	107910	43827	625095	89565	305035	119119	180035	42942	35717	97751	42685	88648	69755	74266	8305	580604	229408	31999	394098
2011	20	广 西	Guangxi	108302	47463	677898	92084	387018	128162	184347	43156	42085	110066	49458	93370	76324	80985	8174	602100	247300	33362	404681
2012	20	广 西	Guangxi	99260	52832	718610	98378	425239	128422	184799	47600	44284	116635	53961	89188	93480	88400	7400	608406	260128	32862	429945
2013	20	广 西	Guangxi	91409	43566	808122	147388	608630	140750	212419	54101	52360	115919	77624	98458	93828	96035	5732	618283	280245	33188	451886
2014	20	广 西	Guangxi	82798	37971	781960	140576	609645	132932	209094	50128	44580	117620	79528	110740	97686	95895	8167	618583	298874	33603	464204
2015	20	广 西	Guangxi	81813	29982	762085	138609	651566	133996	200340	47820	43516	132711	79300	112055	95401	93280	7798	620345	307328	33718	482445
2016	20	广 西	Guangxi	78057	31114	724268	137440	648694	135124	194274	45976	42259	142951	79589	99695	88998	85160	7417	618322	316696	32498	505363
2017	20	广 西	Guangxi	72575	34253	668708	117905	651386	127344	190175	44410	40165	146658	78815	107708	83177	79014	7067	624407	333140	33127	540226
2018	20	广 西	Guangxi	58941	29697	529696	101641	667752	124536	188005	44239	49399	155830	78301	117887	70960	70581	6958	631442	334868	31611	575452
2019	20	广 西	Guangxi	54293	13677	499975	100094	718537	129596	190555	43678	45243	195976	90944	2118	73981	73613	9913	687030	353294	31996	616051
2003	21	海 南	Hainan	204669	11505	69623	20344	44523	33548	36131	30895	6331	19013	10688	10386	14254	16174		84225	28564	11925	82225
2004	21	海 南	Hainan	189814	11182	72589	19787	52191	28851	41651	32129	7090	18543	14091	12211	14614	19555	630	86583	28825	12206	83259
2005	21	海 南	Hainan	184278	10912	71789	19471	52942	28603	41910	31161	9348	18161	13981	13616	14686	20723	702	88849	29673	12392	84000
2006	21	海 南	Hainan	184917	8346	68796	20696	55749	27648	41254	34007	8251	17199	15788	14477	16046	19404	776	87749	31898	12376	90052
2007	21	海 南	Hainan	179814	8699	73919	19990	51017	28912	41436	37213	8155	18941	17670	20287	16838	21431	1015	93641	33847	12422	86261
2008	21	海 南	Hainan	167203	8983	72975	18215	49441	28362	41683	38045	6345	19433	22014	19823	14947	20465	1142	101916	34848	11705	90345
2009	21	海 南	Hainan	145680	8965	75417	18900	62396	31896	42353	39964	6886	19616	24282	20568	15525	20148	1752	111839	38248	13709	95058
2010	21	海 南	Hainan	122717	8993	80444	19513	67549	35177	43013	43658	7274	21078	31805	21798	16727	22252	3127	117600	41365	11889	97150
2011	21	海 南	Hainan	118336	9974	83665	19819	55839	44003	46314	51949	9748	24010	34864	23542	16100	21679	3906	124778	44528	12265	105950
2012	21	海 南	Hainan	119028	9792	94934	21191	59515	53711	45144	62179	9968	27660	42436	19762	17311	25650	2180	122746	48455	11226	107902
2013	21	海 南	Hainan	47698	7946	106098	22146	76903	128096	54404	67659	12996	27838	58401	20019	20294	30572	3651	124559	53092	12624	112584
2014	21	海 南	Hainan	103624	6955	97031	22669	73155	59403	54286	64923	15648	34324	73708	24874	21900	27954	4309	129181	57227	12352	131687
2015	21	海 南	Hainan	88088	6362	88127	23918	69072	56181	65287	59528	15329	40956	76967	21137	21598	29481	5252	129682	59293	11639	135668
2016	21	海 南	Hainan	75956	5326	81172	23360	71041	57960	69683	60095	16216	42603	83545	19421	21153	30949	4397	130932	62500	12513	143002
2017	21	海 南	Hainan	55792	5008	77959	21496	62559	57344	70685	58930	19239	47517	91608	20033	20470	33548	5141	131934	66688	13106	149580
2018	21	海 南	Hainan	39491	4552	72113	21594	57255	54788	76296	60546	21986	49974	85894	20155	20101	36373	4099	131020	68783	13509	157268
2019	21	海 南	Hainan	29276	4560	72665	21938	61500	56217	72898	55370	21825	51360	81636	1323	21407	35760	7316	143988	73125	13417	166756
2003	22	重 庆	Chongqing	24646	70538	549374	57952	310358	103184	146220	25137	18988	65603	30671	18049	59383	23342	3820	299109	84637	16621	194531
2004	22	重 庆	Chongqing	23615	84959	530675	56640	348676	94631	145940	25622	22552	69672	28839	14558	58733	22594	4643	309912	85530	15662	192502
2005	22	重 庆	Chongqing	21436	86105	540879	58003	343158	92281	138628	30620	24071	71641	31401	17828	50573	26700	5722	312354	88171	17973	197926
2006	22	重 庆	Chongqing	21354	87437	530752	59058	364778	99698	131791	31535	24095	68480	31662	18769	49880	28048	6065	320847	92648	19780	210715
2007	22	重 庆	Chongqing	18133	88799	554145	60826	375036	100647	126944	35849	24966	80378	42231	36148	51515	31639	5812	325363	98149	22968	217236
2008	22	重 庆	Chongqing	18319	92029	559674	64738	411448	111188	138384	36640	26926	90800	46134	41508	52914	31371	7210	334005	103076	23871	227114
2009	22	重 庆	Chongqing	17084	95343	574146	64215	433209	111757	134554	42483	25462	97491	48761	43005	53852	33766	7735	337812	108879	24353	233597
2010	22	重 庆	Chongqing	18693	94170	624629	66151	479505	111448	143128	42606	28598	106572	55865	52905	54617	37234	9087	350075	116235	25990	246070
2011	22	重 庆	Chongqing	15911	104023	796169	68967	828172	163942	151498	71242	39394	114984	72546	57052	51159	41576	8755	366004	128491	26129	265991
2012	22	重 庆	Chongqing	12924	103873	822507	74994	851617	198069	157561	71293	39429	130264	78198	61238	56553	46405	9336	370584	135236	26375	285420
2013	22	重 庆	Chongqing	11396	101350	864299	69789	1036407	220882	260834	70802	48920	131173	101117	108525	63594	50051	13378	390685	161980	26175	288857
2014	22	重 庆	Chongqing	11762	89860	892655	70237	1038066	228250	272819	67529	46500	132123	123851	120644	76595	54971	14771	407212	178272	26203	292410
2015	22	重 庆	Chongqing	11738	73480	901939	66811	1015098	221155	271210	63368	46672	132803	125159	121601	79574	63996	14722	412237	189601	28794	316131
2016	22	重 庆	Chongqing	11016	56272	892939	64303	1001775	206607	264857	63535	45809	139834	130140	125698	80907	65275	15380	418335	197187	29130	319824
2017	22	重 庆	Chongqing	11669	40503	837781	64709	977401	194727	270137	60656	47844	143960	138819	133035	82186	68184	14264	417137	202619	31754	326484
2018	22	重 庆	Chongqing	8708	41270	798603	60683	888782	194456	225476	59833	48845	140797	145905	143484	82143	58273	14865	419888	203456	28488	348078
2019	22	重 庆	Chongqing	6719	30832	645231	61662	786599	222986	214978	44703	47360	206355	137469	1780	75870	40584	9957	455633	209404	27473	377446
2003	23	四 川	Sichuan	112681	191906	1194494	156184	723558	206529	225183	45546	46547	161165	42104	33548	110407	71442	24488	778393	261354	51066	620197
2004	23	四 川	Sichuan	102319	186419	1159788	151668	723963	197362	219438	47472	51169	162170	42156	33771	125262	70462	13099	788477	255535	45054	625839
2005	23	四 川	Sichuan	93167	205088	1177767	153111	766749	191409	227940	51934	51227	171761	42945	60051	111594	71717	19516	793394	263595	49437	624120
2006	23	四 川	Sichuan	90515	220137	1186911	150546	804546	179286	230299	49423	50671	163700	48001	58484	114904	78681	19858	807017	270370	43776	638459
2007	23	四 川	Sichuan	83891	232981	1203673	152825	902648	186127	240946	51085	50248	168466	53171	59301	116419	80588	20510	813399	279366	43024	655247
2008	23	四 川	Sichuan	71193	231926	1238586	153793	937875	182072	232188	49861	51795	179433	50918	62669	124890	82680	11721	815886	292373	43375	696251
2009	23	四 川	Sichuan	51304	219114	1230931	154171	996475	174865	237505	52269	59161	203809	53468	60096	131317	91569	10117	821215	312925	43992	739491
2010	23	四 川	Sichuan	50291	204116	1242032	152647	999073	171332	230645	54698	63230	213085	54011	59089	136480	97691	9502	819528	329923	44393	774082
2011	23	四 川	Sichuan	45620	213090	1416225	162750	1118038	178479	225911	61348	64655	214458	64730	63716	146245	100973	10078	850867	365882	44124	793036
2012	23	四 川	Sichuan	40286	244752	1444877	176251	1160870	184898	235581	76382	59859	229727	65708	52201	162010	106302	11124	893974	392690	44975	826419
2013	23	四 川	Sichuan	37407	231977	2045781	271619	1.77836e+06	332283	393912	124573	156216	241172	157346	122099	198608	121165	17005	908523	426578	59205	838624
2014	23	四 川	Sichuan	32317	235147	1754253	267016	1555581	323151	413341	115124	162872	242150	176850	127091	210600	131648	17923	945620	451425	62772	862586
2015	23	四 川	Sichuan	29007	195542	1596566	261437	1538576	308947	407058	105604	182515	258694	186265	141984	210101	128486	19378	948026	467646	60994	907851
2016	23	四 川	Sichuan	28280	185898	1.4833e+06	231708	1514775	305054	404335	96916	184098	303938	198387	155671	210659	129658	22187	943555	484813	60750	931337
2017	23	四 川	Sichuan	24949	170163	1472818	221100	1.45523e+06	302422	389107	93406	201350	316956	215380	167870	218540	126936	26602	960469	514429	62597	981779
2018	23	四 川	Sichuan	21352	134995	1272929	223864	1.60386e+06	275170	373905	95603	193338	323970	218961	184974	203586	114476	18293	961354	513542	55416	1016794
2019	23	四 川	Sichuan	14285	128733	1238169	209088	1516530	281296	319899	125106	200094	326992	251557	2838	152866	97675	27545	1044491	570591	54651	1075719
2003	24	贵 州	Guizhou	44030	89981	424431	59656	186229	116640	99557	24494	11023	48769	25058	32614	27587	22929	4598	358883	87594	20118	290316
2004	24	贵 州	Guizhou	44122	91960	425781	61420	194729	123474	88459	23655	21605	49158	29851	27954	31808	24822	4999	368373	86684	19749	306406
2005	24	贵 州	Guizhou	29618	108624	417190	65367	238522	120644	87371	27455	16410	48666	38240	24486	36088	25209	7800	380138	88767	20299	324989
2006	24	贵 州	Guizhou	29573	106983	410642	65850	227361	119898	84881	28279	14741	49921	39365	25572	36463	27326	7610	387309	93181	18981	331340
2007	24	贵 州	Guizhou	27494	108144	424536	66091	234271	117537	85958	27109	20689	53176	45394	31131	38942	26826	8623	388365	96193	20531	345064
2008	24	贵 州	Guizhou	27369	108270	376133	69842	217414	97988	90089	23360	24686	56765	32193	31514	38227	29351	7481	406082	102619	19011	351916
2009	24	贵 州	Guizhou	19753	115399	373132	66018	220156	99619	91411	26693	23822	59365	36979	40832	45888	29193	10673	413469	110702	18516	385392
2010	24	贵 州	Guizhou	20905	118050	369420	69803	232870	102978	94925	25655	27144	64278	38581	33105	42956	33323	10150	419133	118576	18264	403153
2011	24	贵 州	Guizhou	18663	135445	398782	83107	282707	106332	96691	29414	26787	71546	42834	31271	46388	38289	12799	425384	130764	19489	413790
2012	24	贵 州	Guizhou	16169	181719	476220	84348	348660	131690	91459	39394	24640	73829	54316	29628	54272	41628	9668	441638	146060	16416	433216
2013	24	贵 州	Guizhou	15760	184167	463646	134952	394542	139627	113449	41181	33507	80420	68690	46203	65250	46239	12986	475598	167463	19172	464293
2014	24	贵 州	Guizhou	15331	175868	440823	129544	428082	139440	110875	38936	32921	83538	78813	45021	76551	49535	12916	510554	181438	19921	477363
2015	24	贵 州	Guizhou	11478	154672	424960	128112	428178	123903	116431	29014	32588	86467	87494	45743	76858	49620	12394	536554	199067	20704	510507
2016	24	贵 州	Guizhou	10863	134127	401975	122146	457131	123912	119890	27738	35983	90315	87896	50478	73220	51883	13571	542636	205050	22983	532977
2017	24	贵 州	Guizhou	10242	129692	391242	90799	452285	127350	121651	29272	38037	91727	95552	72064	72049	52620	17249	544169	226834	24103	565299
2018	24	贵 州	Guizhou	7733	113662	315439	91331	450687	119591	118800	25981	34704	88311	86418	74269	67468	51474	14441	552752	220309	23503	628534
2019	24	贵 州	Guizhou	7120	117717	295720	94512	433561	111028	131662	27911	39940	145226	106758	1533	47983	43230	15982	538691	249559	22815	699748
2003	25	云 南	Yunnan	175983	58696	469231	70722	173378	154579	145805	42280	31005	71466	16777	22097	61605	38138	6824	461879	122570	39702	369797
2004	25	云 南	Yunnan	165677	55219	453934	66949	159704	130058	130757	38517	32334	71833	18298	25159	61562	37905	6414	463358	124356	37339	380081
2005	25	云 南	Yunnan	162972	60467	445382	69861	185090	113828	131483	38580	29449	70608	20065	25035	55572	39849	5146	469688	125502	34239	387516
2006	25	云 南	Yunnan	161899	72982	462394	70378	201190	115792	129355	43492	33313	72094	22369	35809	58670	43447	5286	489743	132090	33374	408613
2007	25	云 南	Yunnan	165548	128649	561305	76298	325729	139214	124830	58284	37425	74515	30931	48669	57437	45025	6026	492036	136911	34308	419671
2008	25	云 南	Yunnan	142975	115233	565778	79597	360089	139040	136562	58051	38072	84059	33063	49976	60920	46815	6065	506440	142027	31517	438758
2009	25	云 南	Yunnan	85068	145514	608339	79561	362867	146872	142520	58639	40521	88466	36616	57865	64162	51296	7385	507329	150104	34830	452443
2010	25	云 南	Yunnan	144926	151612	588358	84928	376134	155697	134067	58115	35102	90275	41347	71754	62391	52959	7728	517788	157594	35530	461426
2011	25	云 南	Yunnan	110142	184063	632443	94887	481151	193644	135889	73795	40738	97341	53681	67421	64310	54524	7380	528925	175720	34364	470247
2012	25	云 南	Yunnan	91999	222721	705302	97205	664383	235155	135612	85081	43075	98463	72810	61996	77777	57191	8149	549145	193633	33617	493421
2013	25	云 南	Yunnan	71087	229195	739954	103013	736778	255150	167968	95535	66460	98997	100707	93650	91924	78403	13539	579952	221897	34743	502352
2014	25	云 南	Yunnan	66798	173411	720798	103127	676077	259611	171080	86955	52474	101059	111260	93105	101145	75793	14232	598768	245628	33735	510617
2015	25	云 南	Yunnan	65426	152778	674528	105971	680247	250372	171272	84253	48898	99499	109252	95803	100402	74964	13704	600020	256765	34853	527593
2016	25	云 南	Yunnan	62772	135973	662611	106896	716871	247961	173100	81924	49974	103574	112214	104176	101106	74652	15734	598231	263162	36325	542586
2017	25	云 南	Yunnan	57683	122880	645006	103266	737167	233792	178598	81109	52120	104727	123679	112141	103683	70113	21839	594323	272533	36844	572602
2018	25	云 南	Yunnan	47370	115121	626772	103286	738505	236486	171192	80438	48813	105403	139036	122870	98604	71898	24658	606669	281004	37910	614238
2019	25	云 南	Yunnan	35203	66380	421395	120762	389169	158138	162998	54402	53321	118991	103781	2565	93538	60876	15930	633713	301683	37673	728282
2003	27	陕 西	Gansu	65538	173366	885985	84538	203811	212439	204219	46894	28978	98457	15243	29100	117619	49266	17509	478886	132371	49603	409116
2004	27	陕 西	Gansu	65976	176618	858637	88207	215177	208323	202439	43949	28852	97995	19204	31092	119584	53202	15874	496879	136895	39547	417367
2005	27	陕 西	Gansu	64234	182432	861828	92411	195797	200041	204452	47684	35112	99466	23976	28403	125206	52755	20452	510688	140120	38621	418197
2006	27	陕 西	Gansu	64701	195493	843496	96661	204395	182666	197233	50721	33342	99762	25838	28908	125696	53845	20907	511263	148037	38277	426480
2007	27	陕 西	Gansu	62605	240394	853912	99586	204514	181545	198350	48195	34940	101021	26527	28557	124399	58392	17698	518903	151335	37961	431152
2008	27	陕 西	Gansu	63719	237434	850642	100806	206314	181945	195621	48021	37137	105675	29514	29992	115400	59853	18123	517688	156514	42005	447498
2009	27	陕 西	Gansu	41484	232030	821814	99729	240787	122736	192057	56946	61895	128648	45090	31316	127894	71944	16200	535882	178688	44133	474579
2010	27	陕 西	Gansu	43633	246629	810080	110181	252309	124128	191082	63084	70856	141411	51443	35003	128218	78919	17201	551262	192276	46419	493922
2011	27	陕 西	Gansu	42404	289171	851291	96576	346119	149298	196734	74107	77179	140494	62935	41039	143522	84816	13816	566549	206047	49288	505576
2012	27	陕 西	Gansu	36369	299886	862145	95723	428073	178351	183423	74893	78126	146178	66265	44698	143775	89264	15027	568677	219122	50098	532144
2013	27	陕 西	Gansu	26097	363122	1079059	122036	721432	259513	250381	125634	94705	150381	87012	75546	167400	89339	19660	585108	234149	45719	557034
2014	27	陕 西	Gansu	23587	360986	1061298	126775	709790	263715	287338	117718	103733	160669	106751	84993	177691	97752	17161	596054	254779	45262	569110
2015	27	陕 西	Gansu	22313	353696	1044393	136672	643716	258011	279930	110675	102252	180004	111196	109373	183158	96078	16894	579275	261522	49790	579407
2016	27	陕 西	Gansu	23905	349466	1019902	136706	611293	257810	283123	105890	111536	203485	114716	108886	182434	96135	15697	580567	266543	49785	595999
2017	27	陕 西	Gansu	22314	347153	1002236	127576	603581	266355	279550	101078	115752	224008	117534	89853	187137	98808	15124	556297	281222	56049	612254
2018	27	陕 西	Gansu	17657	337945	917743	121519	611984	227171	272829	95735	127107	216191	118577	85105	170445	102176	15835	550520	278353	55731	609032
2019	27	陕 西	Gansu	13471	338186	803849	135027	586876	226534	271497	92580	133833	277888	138234	3787	129391	103472	18598	614329	315951	57443	645818
2003	28	甘 肃	Qinghai	86691	78225	480550	71398	156288	94514	125303	19137	19955	52708	12521	17122	47679	35319	3289	277106	75089	38342	262999
2004	28	甘 肃	Qinghai	88545	78600	474652	70614	148852	85845	123754	24022	21325	56272	10113	19136	48965	37090	5256	292339	74939	28967	247132
2005	28	甘 肃	Qinghai	84096	93758	441574	68257	137613	84892	117049	24967	22068	58859	11487	20570	47753	38839	6050	308425	76205	27332	272786
2006	28	甘 肃	Qinghai	65568	130108	431808	67837	144421	75385	110463	21543	17037	58394	14846	24949	49236	41174	6441	298379	79012	22379	286233
2007	28	甘 肃	Qinghai	58585	111160	397645	68003	145043	71291	98950	21462	16915	63006	19343	23087	49811	35224	3539	314380	85920	22112	344267
2008	28	甘 肃	Qinghai	58988	85764	369429	65212	163133	60310	102223	19582	15450	66859	14429	19162	48600	36159	3510	336840	89009	24454	346347
2009	28	甘 肃	Qinghai	52687	88126	386117	67351	140510	55500	103072	19951	22355	66131	17113	19745	49570	33679	3441	335777	91757	25017	351922
2010	28	甘 肃	Qinghai	52776	91018	352602	68085	153922	56547	101369	18889	17716	68059	17277	18516	51779	33914	2287	342117	99826	28354	367873
2011	28	甘 肃	Qinghai	52197	96916	338608	70493	190546	56003	103980	18577	18043	69015	16364	18710	49891	39811	3706	351824	109716	24684	363848
2012	28	甘 肃	Qinghai	55471	96645	338144	72169	229867	60073	103610	19290	20373	71862	18849	17090	56127	51900	3999	368351	116930	25672	386887
2013	28	甘 肃	Qinghai	52254	105772	391870	100410	460595	76774	126629	35232	30607	72118	38869	27206	68695	54249	3309	365206	127819	25097	403743
2014	28	甘 肃	Qinghai	50176	126048	374693	129246	456938	81849	124382	33622	27561	72280	44845	31261	70397	59353	2990	380510	137156	25251	418890
2015	28	甘 肃	Qinghai	49721	118592	356230	120637	438157	81736	125717	33416	27300	74747	44879	29939	69689	59366	3067	388827	142804	25146	427593
2016	28	甘 肃	Qinghai	49634	106657	335818	121906	436959	81249	127973	32314	27494	76216	51748	35983	68895	59106	3267	386669	145362	27213	435120
2017	28	甘 肃	Qinghai	42172	92149	315050	125533	405211	77425	133029	31654	28994	84387	52697	52836	71186	64201	2684	382369	153816	28297	448480
2018	28	甘 肃	Qinghai	39851	83794	291478	120490	355949	69900	145818	26607	29766	76886	45306	34106	64987	64094	3956	355928	166358	26672	464885
2019	28	甘 肃	Qinghai	19804	76683	281307	113119	345873	78385	131580	28030	37413	95629	54447	1966	66032	59999	5226	391520	170374	27926	508681
2003	29	青 海	Ningxia	22930	18713	68410	17277	29407	18138	29067	5216	7029	15034	1648	4897	19295	11840	2291	61072	21903	5767	66824
2004	29	青 海	Ningxia	22520	17948	67430	17424	28486	17083	34636	4156	7295	14294	1256	5247	20003	7847	1965	61132	22032	5581	68877
2005	29	青 海	Ningxia	22621	15848	66764	17388	29133	16551	33910	4461	7857	14021	1979	5900	18432	7607	2459	61672	24406	6415	68938
2006	29	青 海	Ningxia	22939	16769	67114	17395	29006	15476	32957	4116	8064	14530	1975	6962	17811	7701	2922	62753	25120	6457	71990
2007	29	青 海	Ningxia	22247	16124	71291	19055	34879	14635	33065	3970	8715	15269	2729	8011	16645	8054	6326	63971	25726	7007	76184
2008	29	青 海	Ningxia	23193	17850	79513	14281	35131	15859	32239	3801	8225	16240	5870	5208	17337	9345	5785	68033	26714	6582	78958
2009	29	青 海	Ningxia	19786	19303	87203	13043	39972	18049	32761	4771	8210	18156	6812	9076	21039	9866	3271	73385	29567	6649	85335
2010	29	青 海	Ningxia	17453	20022	97600	12350	40593	17408	32740	4749	7827	19648	6322	8304	23101	11328	3048	75170	31984	7331	89064
2011	29	青 海	Ningxia	17909	26027	120868	14535	66314	22652	34290	7632	8844	20035	9530	8409	26515	10114	2868	75901	33954	7222	92288
2012	29	青 海	Ningxia	15669	25860	116883	19845	73524	23542	34008	6789	9275	21912	7536	7939	28209	10216	3366	75788	36704	7766	92040
2013	29	青 海	Ningxia	14207	44155	118359	18548	73223	23644	47567	6058	10001	21601	8252	7046	23425	10366	557	76453	36797	8147	93540
2014	29	青 海	Ningxia	13700	42065	112628	18887	75510	23220	40890	5977	9330	22377	7831	7942	22894	10169	828	73928	37567	8504	97614
2015	29	青 海	Ningxia	13504	39282	108846	19568	70078	22866	42732	5920	8184	22545	8519	7882	22045	10389	872	75774	38067	8524	101539
2016	29	青 海	Ningxia	13726	34848	105546	21583	66790	23425	42837	6138	8907	23772	9411	8583	22060	10636	866	77348	40850	8054	105546
2017	29	青 海	Ningxia	14459	31226	101341	23690	64791	22094	46890	6166	9000	22680	10399	7581	22549	12001	824	76373	43216	8622	109594
2018	29	青 海	Ningxia	12207	30387	89896	23717	57536	20479	45725	4895	8515	23071	9497	6731	22292	11121	543	77623	47563	8227	127193
2019	29	青 海	Ningxia	5549	31343	89094	20809	45538	23679	51946	5752	9480	28961	13751	1716	18078	9545	1372	86212	53559	8242	151326
2003	30	宁 夏	Xinjiang	44268	61652	120411	31450	43821	24695	32055	8063	6019	23027	6485	6232	12410	16782		75007	25533	7932	70151
2004	30	宁 夏	Xinjiang	41653	59715	119936	29529	41830	21906	32112	6770	5979	22660	6398	6504	11714	17611	561	74924	25803	8001	70535
2005	30	宁 夏	Xinjiang	40319	55649	112768	35517	39699	20821	31373	7349	5392	23645	6812	6803	10927	17808	600	72552	26608	8540	73658
2006	30	宁 夏	Xinjiang	30397	56611	110300	36728	36829	18919	29015	6537	5067	25300	5856	9152	11418	18504	602	75828	26931	8298	74415
2007	30	宁 夏	Xinjiang	34189	49684	112130	36289	30526	18497	28069	5931	5123	25607	9335	8704	12112	18756		75831	27312	8807	75027
2008	30	宁 夏	Xinjiang	30931	50069	106515	38957	24138	17375	28153	5597	6427	26383	7453	8191	11917	19069		77302	27894	8411	76090
2009	30	宁 夏	Xinjiang	24900	55518	105240	41616	24290	16477	30366	4894	6804	26529	8103	10840	12431	18004		78435	29135	8837	78169
2010	30	宁 夏	Xinjiang	26339	57620	105891	36833	30200	15437	28744	4211	6423	26700	8063	13971	11979	17849		79023	33006	7645	82848
2011	30	宁 夏	Xinjiang	27479	60090	107515	35453	26478	16016	31649	4034	5973	28026	10667	14453	12583	18144		82475	36072	7265	83778
2012	30	宁 夏	Xinjiang	23789	65632	107791	41126	43860	27832	35667	6208	6304	29628	11392	17502	11864	20151		84352	40376	7227	93051
2013	30	宁 夏	Xinjiang	20069	66016	125706	34416	62389	27450	40421	6482	8267	30610	14410	19752	13975	21093	933	88043	40831	8067	92829
2014	30	宁 夏	Xinjiang	15496	63298	129449	37018	60228	27010	39414	6574	8431	34059	15147	19287	14059	21326	747	88753	43006	8661	100527
2015	30	宁 夏	Xinjiang	14197	59676	128195	35146	53337	24713	37757	6772	8023	37667	16538	19539	15449	22654	841	92901	44639	10532	102652
2016	30	宁 夏	Xinjiang	13273	52761	122084	34575	43591	24303	36718	6282	7782	40356	15117	18209	15587	23359	750	88625	45892	10154	107528
2017	30	宁 夏	Xinjiang	12109	50282	124881	34083	41493	24109	37452	5852	8121	40090	14972	18365	15076	22707	581	88755	48527	9983	113935
2018	30	宁 夏	Xinjiang	8178	55574	98957	34769	35045	23760	38656	5272	7510	40604	13747	17639	13246	19902	278	89988	46977	9027	120559
2019	30	宁 夏	Xinjiang	7313	56075	89078	34672	34102	23334	38387	4632	7947	39427	14397	44	14111	16542	312	95746	52373	8156	133328
2003	31	新 疆		652100	139387	269113	55544	164957	80929	110560	27765	15337	60811	21783	36935	40572	41180	17165	306787	104883	25789	275177
2004	31	新 疆		625345	153773	258257	55380	157309	79355	115628	27608	16748	67334	23499	36070	46052	41982	3822	310603	104981	23818	287570
2005	31	新 疆		615396	159744	247204	56371	160628	75801	116471	27674	21717	57819	23341	40281	43973	42642	2953	319876	108298	24542	302365
2006	31	新 疆		613878	174930	237084	57895	141335	76495	110921	28192	19021	59700	20041	48941	44324	43203	3486	327701	112718	24725	306838
2007	31	新 疆		602447	184319	250165	59900	143293	69671	110373	26530	18222	60376	26415	50534	45220	44656	2868	330775	115993	24952	311600
2008	31	新 疆		599523	177488	250300	59585	138386	65935	108388	27964	18927	64290	20491	52375	45852	45674	3944	332545	122085	24195	323780
2009	31	新 疆		579529	176178	253778	59973	143294	64198	108969	24200	19650	66930	21435	48734	46726	47860	4637	331574	130244	25737	340541
2010	31	新 疆		583455	175200	259793	60548	150092	64019	111062	23059	18463	71346	22975	48344	47903	50980	5776	338625	138321	26580	353025
2011	31	新 疆		579367	187089	300715	75924	206389	85038	123005	28885	24953	80947	27712	53260	49873	52984	16149	339488	148038	32161	381865
2012	31	新 疆		562081	188505	305850	75908	223839	82209	125981	28012	26395	81278	31876	53533	60677	54227	5974	359779	157753	29474	434359
2013	31	新 疆		549072	197095	336975	83170	262547	82750	174876	27791	28794	87380	39746	59437	64686	54584	7073	370336	167324	29615	471835
2014	31	新 疆		529489	192024	360261	94940	254343	82516	173796	23952	27698	88797	45106	74397	65664	56112	7087	379485	175425	29818	505568
2015	31	新 疆		517464	178515	348394	89279	247312	82386	167098	24060	28662	90236	50588	85118	64250	58597	7125	383961	180220	29783	539435
2016	31	新 疆		487830	160268	358374	96476	249814	89174	166127	22756	29006	94438	54074	80439	63669	57067	7092	391308	185627	29810	581485
2017	31	新 疆		496787	156764	355692	99396	263818	90383	166862	22228	28466	98061	56080	86189	63426	57074	10057	400471	189225	29274	679821
2018	31	新 疆		102046	147033	325260	95819	217682	87363	166598	22819	31479	95267	51528	100133	64687	59425	5537	460913	197599	26524	794601
2019	31	新 疆		32053	140957	324398	101732	203655	103521	166577	25148	36214	112328	60180	1623	66049	58305	5153	518929	226338	25515	872100
